# Supplementary material for: Effect of Site and Phenological Status on the Potato Bacterial Rhizomicrobiota
Source: MDPI journal article supplement (doi:10.3390/microorganisms10091743), 2022-08-29

# Effect of site and phenological status on the potato bacterial rhizomicrobiota

Lisa Cangioli<sup>1</sup>, Ada Daniela Baldi<sup>2,\*</sup>, Camilla Fagorzi<sup>1</sup>, Marco Mancini<sup>2</sup>, Simone Orlandini<sup>2</sup>, Francesca Vaccaro<sup>1</sup>, Alessio Mengoni<sup>1,\*</sup>

<sup>1</sup> Department of Biology, University of Florence, via Madonna del Piano 6, 50019 Sesto Fiorentino, Italy

<sup>2</sup> Department of Agriculture, Food, Environment and Forestry (DAGRI), University of Florence, Piazzale delle Cascine 18, 50144 Firenze, Italy

\* correspondence: A.D.B., [ada.baldi@unifi.it](mailto:ada.baldi@unifi.it); A.M., [alessio.mengoni@unifi.it](mailto:alessio.mengoni@unifi.it)

## Supplementary information file

**Dataset S1:** Table reporting the amplicon sequence variants (ASVs) detected, their taxonomic assignment and occurrence; .csv file.

**Table S1:** Table containing, sample codes, locality, phenological stage, fast1 file name, the number of total input reads from fastq files and the number of reads that passed the filtering parameters; .xlsx file.

**Table S2:** Table containing the physicochemical features of soil samples; .xlsx file.

**Table S3:** Table of Good's coverage values. Good's coverage was estimated on the amplicon sequence variant (ASV) table for each sample after removing chimeras; .csv file.

**Table S4:** List of richness, diversity and evenness indices; .csv file.

**Table S5:** Results of Permutational Multivariate Analysis of Variance (PERMANOVA) test performed on alpha diversity indices; .csv file.

**Table S6:** List of p values calculated through a Permutational Multivariate Analysis of Variance (PERMANOVA) test performed on the phyloseq object after a centered log ratio (CLR) transformation; .csv file.

**Table S7:** Results of DeSeq2 on ASVs mostly differing among localities; .csv file.

**Table S8:** List of all identified metabolic pathways present in the taxa retrieved in the bacterial community; .xlsx file.

**Figure S1:** Climatic conditions. The cumulated growing degree days (GDD; °C) (top row) and the cumulated precipitation (mm) (bottom row) are reported. Results were calculated on a monthly basis (April-August) (left panel) and for the entire growing season (from sowing to maturity) (right panel).

**Figure S2:** Rarefaction curve of all soil samples. The x axis indicates the number of sequences found for each sample, while the y axis indicates the species richness.

**Figure S1.** Climatic conditions. The cumulated growing degree days (GDD; °C) (top row) and the cumulated precipitation (mm) (bottom row) are reported. Results were calculated on a monthly basis (April-August) (left panel) and for the entire growing season (from sowing to maturity) (right panel).

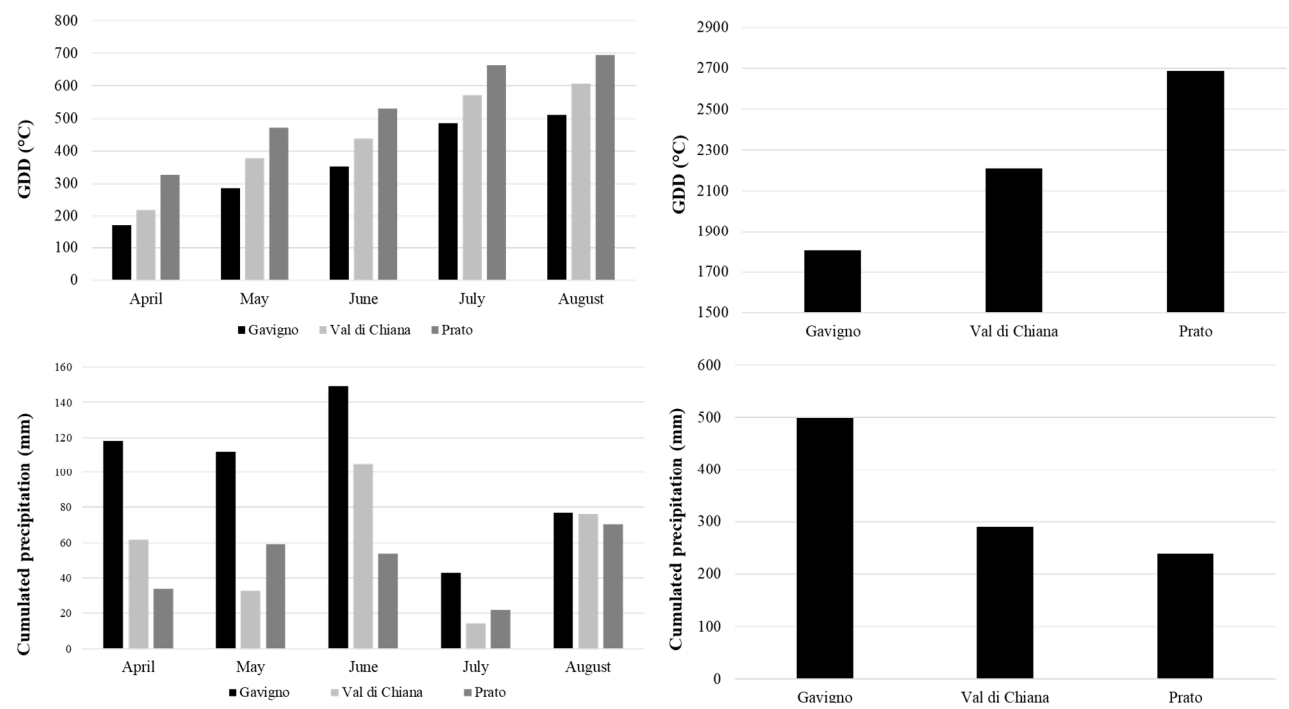

**Figure S2:** Rarefaction curve of all soil samples. The x axis indicates the number of sequences found for each sample, while the y axis indicates the species richness.

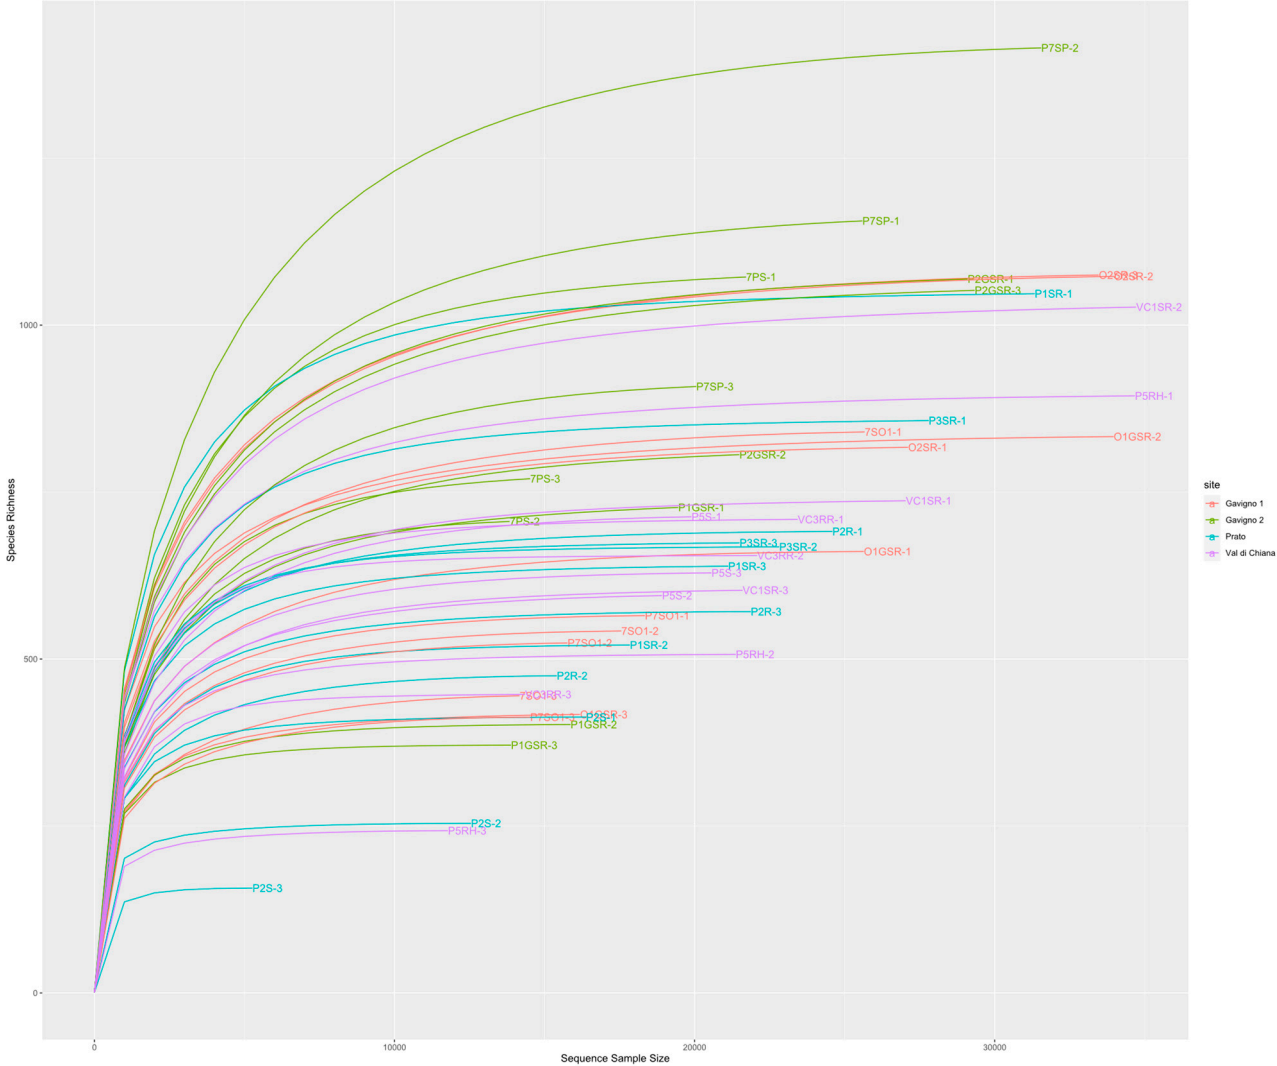

Supplement: s1 [file s1]
