# Supplementary material for: Effect of Site and Phenological Status on the Potato Bacterial Rhizomicrobiota
Source: Microorganisms. 2022 Aug 29;10(9):1743. doi: 10.3390/microorganisms10091743 (PMC9501399; doi:10.3390/microorganisms10091743)
Supplement: Supplementary file 1 [file microorganisms-10-01743-s001.zip]

Archive with 11 entries (11 files):
- Cangioli_patata_Suppl_Info_submitted.pdf
- Dataset S1 - ASVs and occurence.csv
- Table S1_samples and metadata.xlsx
- Table S2 - Soil composition_Ada.xlsx
- Table S3 - Goodscoverage.csv
- Table S4 - diversity indices.csv
- Table S5 - alphadiv_permanova.xlsx
- Table S6 - betadiv_permanova.xlsx
- Table S6 - betadiv_permanova_final.xlsx
- Table S7 - deseq_locality.xlsx
- Table S8 - Identified metabolic pathways.xlsx
