# Supplementary material for: Effect of Site and Phenological Status on the Potato Bacterial Rhizomicrobiota
Source: Microorganisms. 2022 Aug 29;10(9):1743. doi: 10.3390/microorganisms10091743 (PMC9501399; doi:10.3390/microorganisms10091743)
Supplement: Supplementary file 1 [file microorganisms-10-01743-s001.zip › Table S1_samples and metadata.xlsx]

## Sheet: Foglio1
Sample code	Phenological stage	Locality	Fastq file name	reads input	reads output (after filtering)
7PS-1	flowering stage	Gavigno 2	7PS-1_R1.fastq	87076	62517
7PS-2	flowering stage	Gavigno 2	7PS-2_R1.fastq	53945	40436
7PS-3	flowering stage	Gavigno 2	7PS-3_R1.fastq	60874	45031
7SO1-1	flowering stage	Gavigno 1	7SO1-1_R1.fastq	110269	79658
7SO1-2	flowering stage	Gavigno 1	7SO1-2_R1.fastq	69757	52154
7SO1-3	flowering stage	Gavigno 1	7SO1-3_R1.fastq	63067	47450
O1GSR-1	harvesting time	Gavigno 1	O1GSR-1_R1.fastq	99132	71702
O1GSR-2	harvesting time	Gavigno 1	O1GSR-2_R1.fastq	125741	89830
O1GSR-3	harvesting time	Gavigno 1	O1GSR-3_R1.fastq	68740	47824
O2SR-1	harvesting time	Gavigno 1	O2SR-1_R1.fastq	100426	72901
O2SR-2	harvesting time	Gavigno 1	O2SR-2_R1.fastq	121870	88417
O2SR-3	harvesting time	Gavigno 1	O2SR-3_R1.fastq	124531	88382
P1GSR-1	harvesting time	Gavigno 2	P1GSR-1_R1.fastq	61857	45489
P1GSR-2	harvesting time	Gavigno 2	P1GSR-2_R1.fastq	50007	37993
P1GSR-3	harvesting time	Gavigno 2	P1GSR-3_R1.fastq	52043	34681
P1SR-1	harvesting time	Prato	P1SR-1_R1.fastq	108935	79808
P1SR-2	harvesting time	Prato	P1SR-2_R1.fastq	59910	44558
P1SR-3	harvesting time	Prato	P1SR-3_R1.fastq	68363	51041
P2GSR-1	harvesting time	Gavigno 2	P2GSR-1_R1.fastq	93506	68162
P2GSR-2	harvesting time	Gavigno 2	P2GSR-2_R1.fastq	71924	51877
P2GSR-3	harvesting time	Gavigno 2	P2GSR-3_R1.fastq	93462	66563
P2R-1	flowering stage	Prato	P2R-1_R1.fastq	85402	61903
P2R-2	flowering stage	Prato	P2R-2_R1.fastq	51905	39469
P2R-3	flowering stage	Prato	P2R-3_R1.fastq	71593	53181
P2S-1	flowering stage	Prato	P2S-1_R1.fastq	56145	39993
P2S-2	flowering stage	Prato	P2S-2_R1.fastq	42816	31703
P2S-3	flowering stage	Prato	P2S-3_R1.fastq	27976	20281
P3SR-1	harvesting time	Prato	P3SR-1_R1.fastq	84775	61005
P3SR-2	harvesting time	Prato	P3SR-2_R1.fastq	73201	50110
P3SR-3	harvesting time	Prato	P3SR-3_R1.fastq	65272	49215
P5RH-1	flowering stage	Val di Chiana	P5RH-1_R1.fastq	112680	80566
P5RH-2	flowering stage	Val di Chiana	P5RH-2_R1.fastq	71910	53419
P5RH-3	flowering stage	Val di Chiana	P5RH-3_R1.fastq	38798	28789
P5S-1	flowering stage	Val di Chiana	P5S-1_R1.fastq	81651	57216
P5S-2	flowering stage	Val di Chiana	P5S-2_R1.fastq	68968	51214
P5S-3	flowering stage	Val di Chiana	P5S-3_R1.fastq	73131	53229
P7SO1-1	flowering stage	Gavigno 1	P7SO1-1_R1.fastq	88735	62625
P7SO1-2	flowering stage	Gavigno 1	P7SO1-2_R1.fastq	73688	55243
P7SO1-3	flowering stage	Gavigno 1	P7SO1-3_R1.fastq	64129	47697
P7SP-1	flowering stage	Gavigno 2	P7SP-1_R1.fastq	106944	77794
P7SP-2	flowering stage	Gavigno 2	P7SP-2_R1.fastq	117828	89742
P7SP-3	flowering stage	Gavigno 2	P7SP-3_R1.fastq	81792	61310
VC1SR-1	harvesting time	Val di Chiana	VC1SR-1_R1.fastq	87588	61142
VC1SR-2	harvesting time	Val di Chiana	VC1SR-2_R1.fastq	112025	77882
VC1SR-3	harvesting time	Val di Chiana	VC1SR-3_R1.fastq	69935	47816
VC3RR-1	harvesting time	Val di Chiana	VC3RR-1_R1.fastq	83207	57687
VC3RR-2	harvesting time	Val di Chiana	VC3RR-2_R1.fastq	73132	51182
VC3RR-3	harvesting time	Val di Chiana	VC3RR-3_R1.fastq	49985	33361
