# Supplementary material for: Effect of Site and Phenological Status on the Potato Bacterial Rhizomicrobiota
Source: Microorganisms. 2022 Aug 29;10(9):1743. doi: 10.3390/microorganisms10091743 (PMC9501399; doi:10.3390/microorganisms10091743)
Supplement: Supplementary file 1 [file microorganisms-10-01743-s001.zip › Table S2 - Soil composition_Ada.xlsx]

## Sheet: Foglio1
Properties	Measure Unit	Gavigno 1	Gavigno 2	Val di Chiana	Prato
Clay	%	16.8	16	15.9	12.6
Silt	%	56.4	49.1	55.8	51.7
Sand	%	26.8	34.9	28.4	35.7
Organic matter	%	2.48	2.68	1.45	1.24
Total nitrogen	N g kg-1	1.5	1.8	0.95	1
Available phosphorous	mg kg−1	90	146	56	108
Exchangeable potassium	mg kg−1	453	972	557	91
Exchangeable calcium	mg kg−1	1363	1075	1537	1689
Exchangeable magnesium	mg kg−1	112	163	297.5	105
pH		5.5	4.6	6.6	6.9
Cation Exchange Capacity	cmol kg−1	15.2	16.2	11.5	9.7
E.C.	mS cm-1	0.51	2.07	0.48	0.43
C/N		9.9	8.5	8.9	7.6
Active limestone	%	<0,1	<0,1	<0,1	<0,1
