# Supplementary material for: Effect of Site and Phenological Status on the Potato Bacterial Rhizomicrobiota
Source: Microorganisms. 2022 Aug 29;10(9):1743. doi: 10.3390/microorganisms10091743 (PMC9501399; doi:10.3390/microorganisms10091743)
Supplement: Supplementary file 1 [file microorganisms-10-01743-s001.zip › Table S3 - Goodscoverage.csv]

	no.sing	no.seqs	goods
7PS-1	45	21715	99.7927699746719
7PS-2	25	13836	99.819311939867
7PS-3	38	14520	99.7382920110193
7SO1-1	19	25668	99.9259778712794
7SO1-2	7	17556	99.9601275917065
7SO1-3	12	14168	99.9153020892151
O1GSR-1	7	25637	99.972695713227
O1GSR-2	14	33962	99.958777457158
O1GSR-3	7	16180	99.9567367119901
O2SR-1	18	27113	99.9336111828274
O2SR-2	25	33978	99.926422979575
O2SR-3	24	33467	99.9282875668569
P1GSR-1	37	19457	99.8098370766305
P1GSR-2	3	15866	99.981091642506
P1GSR-3	1	13883	99.9927969459051
P1SR-1	16	31334	99.9489372566541
P1SR-2	6	17843	99.9663733677072
P1SR-3	8	21119	99.9621194185331
P2GSR-1	43	29098	99.8522235205169
P2GSR-2	38	21493	99.8231982505932
P2GSR-3	38	29332	99.8704486567571
P2R-1	6	24591	99.9756008295718
P2R-2	5	15408	99.967549325026
P2R-3	3	21873	99.9862844602935
P2S-1	0	16385	100
P2S-2	1	12547	99.9920299673229
P2S-3	0	5266	100
P3SR-1	12	27799	99.9568329796036
P3SR-2	5	22818	99.9780874748006
P3SR-3	8	21496	99.9627837737253
P5RH-1	13	34671	99.9625046869141
P5RH-2	4	21373	99.9812847985776
P5RH-3	1	11780	99.9915110356536
P5S-1	16	19898	99.9195899085335
P5S-2	15	18915	99.9206978588422
P5S-3	9	20563	99.9562320673054
P7SO1-1	8	18346	99.9563937643083
P7SO1-2	8	15765	99.9492546780844
P7SO1-3	2	14523	99.9862287406183
P7SP-1	52	25591	99.7968035637529
P7SP-2	38	31550	99.8795562599049
P7SP-3	38	20055	99.8105210670656
VC1SR-1	15	27037	99.9445204719459
VC1SR-2	33	34713	99.9049347506698
VC1SR-3	15	21600	99.9305555555556
VC3RR-1	6	23437	99.974399453855
VC3RR-2	3	22086	99.986416734583
VC3RR-3	4	14350	99.9721254355401
