# Supplementary material for: Effect of Site and Phenological Status on the Potato Bacterial Rhizomicrobiota
Source: Microorganisms. 2022 Aug 29;10(9):1743. doi: 10.3390/microorganisms10091743 (PMC9501399; doi:10.3390/microorganisms10091743)
Supplement: Supplementary file 1 [file microorganisms-10-01743-s001.zip › Table S4 - diversity indices.csv]

	inverse_simpson	gini_simpson	shannon	fisher	coverage	observed	chao1	camargo	pielou	simpson	evar	bulla
7PS-1	331,6016718577	0,9969843337	6,2698401556	236,642056095	119	1072	1086,8897058824	0,8099704964	0,8986079031	0,3093299178	0,3970682656	0,5100529244
7PS-2	217,6905536793	0,9954063234	5,838900375	157,302704977	76	706	711,2083333333	0,8039751578	0,8901284852	0,3083435605	0,397593518	0,5030406853
7PS-3	251,8292012862	0,9960290546	5,963615317	173,4526119342	88	770	781,1076923077	0,856186183	0,8972712788	0,3270509108	0,3969477977	0,5158214131
7SO1-1	329,9652448974	0,9969693778	6,1133159586	166,5236057275	118	840	842,2012195122	0,8456645109	0,9079089674	0,3928157677	0,3319982501	0,527769373
7SO1-2	215,4336280217	0,9953581991	5,6944006442	105,9350936325	79	542	542,4537037037	0,8707410929	0,9045528248	0,3974790185	0,3336639061	0,5433374227
7SO1-3	183,8661793667	0,9945612619	5,4872985125	87,3389907633	67	445	446,3333333333	0,8778757637	0,8998412054	0,4131824255	0,2946005776	0,5336861777
O1GSR-1	261,2106032491	0,9961716715	5,8699249857	123,8374881277	97	661	661,4711538462	0,8260339854	0,9039340157	0,3951748915	0,3118485901	0,5261534879
O1GSR-2	365,1585170495	0,9972614633	6,1887784442	154,2979994296	133	833	835,1777777778	0,8241920406	0,920259849	0,4383655667	0,3409851338	0,5672586414
O1GSR-3	182,0040211681	0,9945056159	5,4880331374	78,1171217805	67	417	417,7903225806	0,8129629794	0,9096560095	0,4364604824	0,3340332046	0,5585419737
O2SR-1	313,7462880219	0,9968127113	6,0802830378	158,7569177104	114	817	820,1764705882	0,8167785118	0,9067417664	0,3840223844	0,3401696202	0,52459053
O2SR-2	397,4389416357	0,9974838902	6,3312036511	210,8715200314	145	1073	1076,6337209302	0,7893388283	0,9072814168	0,3703997592	0,3362140397	0,5155950338
O2SR-3	389,8608104011	0,997434982	6,314801402	212,1410840094	140	1075	1078,1304347826	0,7773609686	0,9046894985	0,362661219	0,3326172994	0,5128422734
P1GSR-1	284,3773959786	0,9964835461	5,9638647828	148,9827257456	104	727	745,0131578947	0,8857837609	0,9051345167	0,3911656066	0,3357022142	0,518106325
P1GSR-2	192,8657777151	0,994815047	5,5195650841	75,0144115905	72	402	402,25	0,9066367708	0,9204718061	0,4797656162	0,3687580914	0,5928919036
P1GSR-3	184,9279948495	0,9945924899	5,4788491374	70,0821552198	69	371	371,0454545455	0,906152942	0,9260753908	0,4984582071	0,4162433921	0,6125251377
P1SR-1	448,8026633243	0,9977718492	6,4283342186	208,6258963513	156	1047	1051,9230769231	0,8536152587	0,9244501222	0,4286558389	0,4281964884	0,5671962941
P1SR-2	216,2538871647	0,9953758057	5,6778618719	100,4821189325	77	521	522,0588235294	0,8803339385	0,9076228804	0,4150746395	0,3683445662	0,5386862549
P1SR-3	276,6802507176	0,9963857196	5,933524329	124,2906957051	99	639	640,28	0,8722419591	0,9185158033	0,4329894377	0,3966306062	0,5695055976
P2GSR-1	363,217583862	0,9972468293	6,2665204662	218,1269482076	129	1069	1081,8402777778	0,7955908619	0,898492998	0,3397732309	0,3381100681	0,4932343768
P2GSR-2	251,8011211292	0,9960286118	5,9369973548	165,3255891275	92	806	820,1568627451	0,7812422972	0,8871672237	0,3124083389	0,3274907671	0,4806397461
P2GSR-3	332,1369489453	0,9969891938	6,2317081872	213,356346181	127	1052	1061,7567567568	0,7885330987	0,8955600207	0,3157195332	0,3361981689	0,4930261297
P2R-1	281,7459648394	0,9964507034	5,9706434649	132,0673162377	103	691	691,5625	0,8275706036	0,9132021685	0,4077365627	0,3715708013	0,5539532255
P2R-2	183,8649814126	0,9945612264	5,5683725149	92,8075502277	71	475	475,2976190476	0,8532997213	0,9034704038	0,3870841714	0,3419713901	0,5452037902
P2R-3	242,4361623153	0,9958752028	5,8015621822	107,281532341	88	571	571,15	0,8224048185	0,9140076322	0,4245817203	0,3656779345	0,5629324305
P2S-1	203,0633481356	0,9950754284	5,5863869609	76,9758919631	75	413	413	0,9114861006	0,9274401204	0,491678809	0,4247826762	0,6176493418
P2S-2	120,1509710016	0,9916771376	5,0858944307	45,0998689848	47	254	254,0454545455	0,871029496	0,918473436	0,4730353189	0,3814771283	0,6237344423
P2S-3	74,3320377628	0,9865468507	4,5877311502	30,4301670537	29	157	157	0,9282647243	0,9073394227	0,4734524698	0,4034952397	0,5989268359
P3SR-1	336,8322229588	0,9970311629	6,1781891755	167,4447067296	121	857	859,7692307692	0,8350139187	0,9148213473	0,3930364329	0,4014430125	0,5518379939
P3SR-2	275,0501455915	0,9963642993	5,9866832298	128,9126407441	103	668	669,5625	0,873645491	0,92042097	0,411751715	0,445200405	0,5791944943
P3SR-3	288,7998429994	0,9965373942	5,9829041747	132,2289463496	103	674	675,3333333333	0,8753358571	0,9185771227	0,4284864139	0,4115006194	0,5624636755
P5RH-1	379,3530025477	0,9973639328	6,246758238	167,4929966775	143	894	896,0119047619	0,8483359108	0,919221409	0,4243322176	0,3536814952	0,559464889
P5RH-2	218,3104020776	0,9954193662	5,7005150971	93,2089826022	78	507	507,5	0,8767936209	0,9152291926	0,430592509	0,3874730863	0,5737741404
P5RH-3	119,1365952829	0,9916062735	5,0264985673	43,321915609	43	243	243,0277777778	0,8959155156	0,9150632337	0,4902740547	0,3482370317	0,6030360325
P5S-1	253,8015410256	0,9960599136	5,8923681199	144,5706147671	91	713	714,9393939394	0,8695788916	0,8969304794	0,3559628906	0,341951023	0,5055572041
P5S-2	242,5287673833	0,9958767778	5,7993751541	116,8220699068	89	595	597,25	0,8488407893	0,9077748159	0,4076113738	0,334125859	0,5401196741
P5S-3	244,7691359676	0,9959145176	5,8320612573	122,666421349	89	629	629,987804878	0,8743109605	0,9050190049	0,3891401208	0,3476500645	0,5316382836
P7SO1-1	225,5987350545	0,995567351	5,7315086852	110,3651363271	81	565	565,6956521739	0,8527405844	0,9044762991	0,3992897966	0,3431481222	0,5277185666
P7SO1-2	201,0508372156	0,9950261336	5,6425828156	104,2766922736	74	524	524,5245901639	0,814288706	0,9011563219	0,3836848038	0,336506203	0,5305507092
P7SO1-3	168,7987068645	0,994075784	5,4280284461	79,156772748	63	413	413,037037037	0,8330146437	0,9011497755	0,4087135759	0,3123665783	0,5452763578
P7SP-1	330,6535076625	0,9969756861	6,2573030624	249,0234707075	115	1156	1167,2666666667	0,7283280008	0,8872182834	0,2860324461	0,3552419643	0,4747111615
P7SP-2	398,1887139345	0,997488628	6,4702289906	304,2253942357	141	1415	1420,3880597015	0,7159889121	0,8918444827	0,2814054515	0,3771171907	0,4810664019
P7SP-3	254,7486482019	0,9960745621	5,9922482954	195,721075141	89	908	915,3673469388	0,763186809	0,8797582295	0,2805601852	0,3516160312	0,4652283948
VC1SR-1	293,5456323304	0,9965933746	5,9950138497	139,862487832	108	737	741,3269230769	0,862904892	0,9079794086	0,3982980086	0,3393300383	0,5301044784
VC1SR-2	362,2815793532	0,9972397161	6,2615347695	198,6911813073	131	1027	1038,8369565217	0,7667953025	0,9029674217	0,3527571367	0,3357384888	0,5117051159
VC1SR-3	210,2506189541	0,9952437714	5,7225719412	115,0718265574	79	603	607,6875	0,7863515755	0,8938840921	0,3486743266	0,3283086493	0,5116722038
VC3RR-1	263,3681389996	0,9962030335	5,9698047584	137,8999247088	91	709	709,7826086957	0,8245699406	0,9094966722	0,3714642299	0,429087202	0,5448768896
VC3RR-2	251,5672410147	0,9960249196	5,9277760805	126,7939877671	91	655	656,125	0,7866534221	0,9141263718	0,3840721237	0,4740678171	0,5561852874
VC3RR-3	160,1268588705	0,9937549515	5,4976362997	87,5558816471	57	447	448	0,8231798517	0,9008739883	0,3582256351	0,4506374966	0,5387834565
