# Supplementary material for: Effect of Site and Phenological Status on the Potato Bacterial Rhizomicrobiota
Source: Microorganisms. 2022 Aug 29;10(9):1743. doi: 10.3390/microorganisms10091743 (PMC9501399; doi:10.3390/microorganisms10091743)
Supplement: Supplementary file 1 [file microorganisms-10-01743-s001.zip › Table S5 - alphadiv_permanova.xlsx]

## Sheet: Foglio1
shannon	Df	SumOfSqs	R2	F	Pr(>F)
site	3	0,003911	0,07587	15064	0,228				Signif. Codes	0(***)	0.001(**)	0.01(*)	0.05 (.)	0.1 ( )
stage	1	0,004511	0,08752	52131	0,018	*
site:stage	3	0,008511	0,16511	32784	0,03	*
Residual	40	0,034616	0,67151
Total	47	0,051549	1
simpson	Df	SumOfSqs	R2	F	Pr(>F)
site	3	0,08671	0,3619	11,9274	0,001	***
stage	1	0,001103	0,0046	0,4555	0,519
site:stage	3	0,054932	0,22927	7,5625	0,002	**
Residual	40	0,096851	0,40422
Total	47	0,239596	1
pielou	Df	SumOfSqs	R2	F	Pr(>F)
site	3	0,00043581	0,24742	6,2539	0,004	**
stage	1	0,00006387	0,03626	2,7498	0,097	.
site:stage	3	0,00033261	0,18883	4,7729	0,008	**
Residual	40	0,000929	0,52749
Total	47	0,00176	1
camargo	Df	SumOfSqs	R2	F	Pr(>F)
site	3	0,006834	0,17867	4,4182	0,011	*
stage	1	0,000359	0,00939	0,6968	0,431
site:stage	3	0,010432	0,27274	6,7443	0,001	***
Residual	40	0,020624	0,5392
Total	47	0,03825	1
