# Supplementary material for: Effect of Site and Phenological Status on the Potato Bacterial Rhizomicrobiota
Source: Microorganisms. 2022 Aug 29;10(9):1743. doi: 10.3390/microorganisms10091743 (PMC9501399; doi:10.3390/microorganisms10091743)
Supplement: Supplementary file 1 [file microorganisms-10-01743-s001.zip › Table S6 - betadiv_permanova.xlsx]

## Sheet: Foglio1
site	Df	SumOfSqs	F	R2	p.value	p.adjusted
Gavigno 2 vs Gavigno 1	1	0,576	1,298	0,055	0,003	0,018	.
Gavigno 2 vs Prato	1	0,943	2,114	0,087	0,001	0,006	*
Gavigno 2 vs Val di Chiana	1	0,709	1,597	0,067	0,001	0,006	*
Gavigno 1 vs Prato	1	0,811	1,763	0,074	0,001	0,006	*
Gavigno 1 vs Val di Chiana	1	0,648	1,418	0,06	0,001	0,006	*
Prato vs Val di Chiana	1	0,693	1,508	0,064	0,001	0,006	*
phenologicalstage	Df	SumOfSqs	F	R2	p.value	p.adjusted
flowering vs harvesting	1	0,5211748	1,112737	0,0236186	0,036	0,036	.
site:stage	Df	SumOfSqs	F	R2	p.value	p.adjusted
Gavigno 2 vs Gavigno 1	2	,9806	0,4903	1,1168	0,09486	0,005	**
Gavigno 2 vs Prato	2	1,0663	0,53315	1,2194	0,09915	0,01	**
Gavigno 2 vs Val di Chiana	2	1,0605	0,53025	1,2189	0,10129	0,001	***
Gavigno 1 vs Prato	2	1,0513	0,52563	1,1599	0,09622	0,005	**
Gavigno 1 vs Val di Chiana	2	1,0455	0,52273	1,1592	0,09758	0,003	**
Prato vs Val di Chiana	2	1,1312	0,56559	1,2592	0,10466	0,001	***
all	Df	SumOfSqs	MeanSqs	F	R2	Pr(F>)
stage	1	0,5212	0,52117	1,1736	0,02362	0,01	**
site	3	2,1906	0,73021	1,6442	0,09927	0,001	***
stage:site	3	1,5906	0,5302	1,1939	0,07208	0,001	***
Residuals	40	17,7639	0,4441		0,80502
Total	47	22,0663			1
