# Supplementary material for: Effect of Site and Phenological Status on the Potato Bacterial Rhizomicrobiota
Source: Microorganisms. 2022 Aug 29;10(9):1743. doi: 10.3390/microorganisms10091743 (PMC9501399; doi:10.3390/microorganisms10091743)
Supplement: Supplementary file 1 [file microorganisms-10-01743-s001.zip › Table S7 - deseq_locality.xlsx]

## Sheet: Foglio1
	baseMean	log2FoldChange	lfcSE	stat	pvalue	padj	domain	phylum	class	order	family	genus
ASV2	25.4411	-23.9842	2.46249	-9.7398	2.03949e-08	1.63159e-05	Bacteria	Proteobacteria	Alphaproteobacteria	Rhizobiales	Xanthobacteraceae	Rhodoplanes
ASV91	11.4237	-22.7966	2.71227	-8.40501	0.00427831	0.0171132	Bacteria	Proteobacteria	Alphaproteobacteria	Rhizobiales	Xanthobacteraceae	Rhodoplanes
ASV68	10.3242	-22.6416	2.85254	-7.93737	0.020652	55.0719	Bacteria	Verrucomicrobiota	Verrucomicrobiae	Chthoniobacterales	Chthoniobacteraceae	Candidatus Udaeobacter
ASV10	13.7752	-24.3453	3.09503	-7.86592	0.366381	7.32762	Bacteria	Actinobacteriota	Actinobacteria	Streptomycetales	Streptomycetaceae	Streptomyces
ASV8	10.3852	-17.3478	2.43583	-7.12193	106.426	17028.2	Bacteria	Verrucomicrobiota	Verrucomicrobiae	Chthoniobacterales	Chthoniobacteraceae	Candidatus Udaeobacter
ASV13	19.0846	-23.6154	3.32824	-7.09547	128.912	17188.3	Bacteria	Actinobacteriota	Actinobacteria	Micrococcales	Intrasporangiaceae	NA
ASV274	5.72271	-22.7982	3.45436	-6.59985	4115.82	470380	Bacteria	Actinobacteriota	Actinobacteria	Streptomycetales	Streptomycetaceae	Streptomyces
ASV19	8.27524	-23.3596	3.7512	-6.22723	47476.7	4.74767e+06	Bacteria	Actinobacteriota	Actinobacteria	Streptomycetales	Streptomycetaceae	Streptomyces
ASV117	3.1118	19.3268	3.38852	5.70362	1.17291e+06	1.04258e+08	Bacteria	Actinobacteriota	Actinobacteria	Propionibacteriales	Nocardioidaceae	NA
ASV201	4.27809	20.7462	3.69078	5.62107	1.89776e+06	1.51821e+08	Bacteria	Actinobacteriota	Actinobacteria	Propionibacteriales	Nocardioidaceae	NA
ASV141	3.42964	-22.5342	4.12422	-5.46388	4.65842e+06	3.38794e+08	Bacteria	Proteobacteria	Alphaproteobacteria	Reyranellales	Reyranellaceae	Reyranella
ASV184	6.98794	22.4561	4.12351	5.44588	5.15504e+06	3.4367e+08	Bacteria	Actinobacteriota	Thermoleophilia	NA	NA	NA
ASV192	3.56261	20.5375	3.94706	5.20323	1.95851e+07	1.20524e+09	Bacteria	Actinobacteriota	Actinobacteria	Streptomycetales	Streptomycetaceae	Streptomyces
ASV186	2.44568	19.376	3.90387	4.9633	6.93058e+07	3.96033e+09	Bacteria	Actinobacteriota	Actinobacteria	Streptomycetales	Streptomycetaceae	Streptomyces
ASV229	11.4043	-19.3127	4.13617	-4.66922	3.0235e+08	0.000161253	Bacteria	Firmicutes	Bacilli	Bacillales	NA	NA
