# Supplementary material for: Effect of Site and Phenological Status on the Potato Bacterial Rhizomicrobiota
Source: Microorganisms. 2022 Aug 29;10(9):1743. doi: 10.3390/microorganisms10091743 (PMC9501399; doi:10.3390/microorganisms10091743)
Supplement: Supplementary file 1 [file microorganisms-10-01743-s001.zip › Table S8 - Identified metabolic pathways.xlsx]

## Sheet: phenological stage
sample,stage,1CMET2-PWY,3-HYDROXYPHENYLACETATE-DEGRADATION-PWY,AEROBACTINSYN-PWY,ALL-CHORISMATE-PWY,ANAEROFRUCAT-PWY,ANAGLYCOLYSIS-PWY,ARG+POLYAMINE-SYN,ARGDEG-PWY,ARGORNPROST-PWY,ARGSYN-PWY,ARGSYNBSUB-PWY,ARO-PWY,ASPASN-PWY,AST-PWY,BIOTIN-BIOSYNTHESIS-PWY,BRANCHED-CHAIN-AA-SYN-PWY,CALVIN-PWY,CATECHOL-ORTHO-CLEAVAGE-PWY,CENTBENZCOA-PWY,CENTFERM-PWY,CHLOROPHYLL-SYN,COA-PWY,COBALSYN-PWY,CODH-PWY,CO…
7PS.1,flowering stage,"16704,24006", 1268.93727, 0.00000, 6135.46019,"17604,0799","21988,73406", 8141.78404, 0.00000, 2105.88065,"19587,27356","21311,75263","21515,21955", 5474.98194, 343.09712,"10490,50413","30291,32584","22576,63139", 955.17337, 0.00000, 1639.97826, 27.94772,"20164,78729", 7877.43654, 1376.23596,"16935,61981","22729,19433", 2117.32232,"18665,30554", 1803.02297, 7346.74031, 48.9…
7PS.2,flowering stage,"10676,316717", 1090.250823, 0.000000, 3804.967230,"11046,557782","14036,670916", 5530.341069, 0.000000, 1444.571508,"12624,383462","13683,181779","13840,490033", 4056.887835, 188.493372, 6529.107790,"19529,437934","14603,870723", 513.077595, 0.000000, 1643.179557, 92.464274,"12847,602601", 4714.293949, 663.516913,"11022,044214","14635,341435", 1417.832785,"12103,919926", 12…
7PS.3,flowering stage,"11314,089297", 1165.668646, 0.000000, 3813.398349,"11944,186546","15079,154544", 5946.922954, 0.000000, 1425.550684,"13448,302116","14566,2377","14721,301327", 4713.440690, 423.859287, 6807.374415,"20793,801666","15680,323944", 765.081086, 0.000000, 1833.340381, 9.325392,"13831,022786", 5190.414932, 832.092408,"11820,725249","15564,532186", 1595.725078,"13195,546776", 1220.…
7SO1.1,flowering stage,"19953,947856", 2577.462876, 25.217307, 7338.546935,"20089,937691","26549,60436","10306,442043", 0.000000, 5773.101682,"23897,721554","25968,4109","25919,783584", 6998.874124, 852.876511,"11751,304801","37114,273803","26868,197332", 1072.692615, 0.000000, 2602.057783, 20.104276,"24319,380585","11557,004881", 2348.887421,"20332,532456","27265,082816", 1001.479400,"22739,3910…
7SO1.2,flowering stage,"13667,790333", 1573.500870, 17.267627, 4668.359031,"13539,427469","18119,167793", 6666.658127, 0.000000, 3343.198634,"16307,314717","17679,822484","17498,028374", 4836.299911, 552.902758, 7355.306023,"25594,089045","18402,468712", 845.917759, 0.000000, 1609.814139, 44.983011,"16519,004978", 7653.854291, 1485.950654,"14667,505182","18413,320165", 704.203701,"15340,402557", …
7SO1.3,flowering stage,"11572,815941", 1300.810533, 0.000000, 4418.893475,"11631,740624","15008,368239", 6049.072388, 0.000000, 3149.941062,"13453,08841","14586,167559","14571,116138", 3978.533195, 379.218405, 6511.290266,"20901,749183","15440,079442", 522.220448, 0.000000, 1468.210668, 0.000000,"13690,977696", 6507.342837, 1360.707511,"11783,292163","15340,269674", 850.906219,"12851,527855", 690…
O1GSR.1,harvesting time,"19562,04831", 1357.410966, 90.503262, 7254.500419,"19735,399595","26005,42027", 9321.343029, 35.829006, 3218.393461,"23846,321771","25943,741382","25888,331752", 6730.723026, 644.823066,"10045,372539","36824,817475","26587,366435", 1041.428500, 0.000000, 1164.673636, 86.673655,"24782,945792","10417,133874", 2341.292894,"20266,642201","27298,575866", 1425.655825,"21948,928…
O1GSR.2,harvesting time,"25648,425461", 1989.156172, 129.164920,"10941,834473","25436,520068","34239,666695","11757,472085", 78.983524, 5170.995669,"31191,896625","33929,038601","33912,843757", 7906.527997, 949.396815,"12601,265035","48599,239955","34320,818413", 985.592809, 0.000000, 1292.453819, 439.823542,"32561,539711","14086,78441", 3063.030018,"26740,744179","35782,982015", 1331.539860,"285…
O1GSR.3,harvesting time,"12842,462734", 688.148703, 5.311260, 4974.353830,"12675,421456","16263,582867", 5206.202863, 0.000000, 3213.293551,"15039,106397","16224,716468","15943,772395", 3964.744074, 521.070067, 6144.986864,"22824,949799","16350,402251", 905.256698, 0.000000, 427.755241, 319.871461,"15395,263857", 6050.551174, 1553.430357,"12280,537976","16783,127001", 1191.813842,"13626,778674", …
O2SR.1,harvesting time,1.986917e+04,1.524369e+03,1.373241e+02,7.739248e+03,2.038015e+04,2.669251e+04,9.360956e+03,3.009632e+02,3.345812e+03,2.425223e+04,2.633541e+04,2.626628e+04,7.644218e+03,8.350571e+02,1.005819e+04,3.800907e+04,2.666821e+04,1.415566e+03,0.000000e+00,1.921681e+03,1.225389e+02,2.499960e+04,1.102133e+04,2.116038e+03,2.169107e+04,2.766767e+04,1.531305e+03,2.288507e+04,1.263158e+03…
O2SR.2,harvesting time,2.459337e+04,2.038696e+03,1.681844e+02,1.013097e+04,2.602561e+04,3.399837e+04,1.200746e+04,4.064584e+02,4.637492e+03,3.064703e+04,3.321360e+04,3.348596e+04,9.746494e+03,8.803549e+02,1.358559e+04,4.797468e+04,3.416105e+04,1.585057e+03,0.000000e+00,1.609052e+03,5.276690e+02,3.151058e+04,1.314511e+04,3.053196e+03,2.704750e+04,3.528892e+04,1.706851e+03,2.927945e+04,1.708627e+03…
O2SR.3,harvesting time,"24236,430754", 1961.807044, 6.654183, 8753.119321,"26168,295053","33606,196585","11284,374902", 0.000000, 4890.638390,"30710,928169","33361,912906","33182,592297", 8656.471653, 542.950071,"11950,916184","47110,501105","33791,802621", 1347.915400, 0.000000, 1687.491952, 233.302596,"31234,274299","13814,611791", 3098.777433,"25862,746121","34904,12393", 1881.964988,"28739,37…
P1GSR.1,harvesting time,"16433,371494", 1142.587228, 104.453842, 4951.573721,"14861,232994","19823,258645", 6181.178836, 0.000000, 2262.774287,"17899,342685","19442,417228","20011,606946", 6341.652792, 1138.388313, 9519.524323,"27942,299304","20095,910162", 1753.620605, 0.000000, 282.986766, 260.592004,"18507,57947", 7333.642267, 995.666122,"16264,037764","21031,080612", 1258.892592,"17739,378749…
P1GSR.2,harvesting time,1.273659e+04,1.128626e+03,1.076718e+02,4.063469e+03,1.124887e+04,1.597453e+04,5.046933e+03,0.000000e+00,1.938039e+03,1.464045e+04,1.586824e+04,1.640536e+04,5.258901e+03,7.085282e+02,6.963233e+03,2.311497e+04,1.611115e+04,1.302899e+03,0.000000e+00,2.360173e+02,1.983983e+02,1.494741e+04,5.893599e+03,1.116770e+03,1.360802e+04,1.725500e+04,7.689851e+02,1.423486e+04,8.092104e+0…
P1GSR.3,harvesting time,"11859,192851", 874.236656, 106.652542, 3276.317202,"10206,620492","14036,861857", 3721.152637, 0.000000, 1371.604329,"12961,037556","14002,00467","14421,778237", 4693.499321, 785.041437, 5943.808206,"20355,774027","14250,115945", 1242.057527, 0.000000, 0.000000, 0.000000,"13283,425035", 5267.972228, 736.788412,"11956,522641","15158,36681", 844.239858,"12759,462172", 697.1…
P1SR.1,harvesting time,"23754,381608", 2310.875060, 729.323503,"11733,742376","28124,436868","32595,373087","11639,686793", 1539.668764, 9468.600809,"28527,975166","30879,318317","31051,53813", 8783.152478, 1765.441386,"11137,340473","43869,349668","33012,80393", 1606.247881, 0.000000, 1962.357360, 756.680474,"28816,724097","13042,08476", 4362.936969,"20980,094622","32704,266252", 3801.576714,"27…
P1SR.2,harvesting time,"12363,09237", 1271.51029, 418.38388, 5879.12845,"14821,77261","16803,5367", 6252.36293, 876.89708, 4937.82573,"14843,55492","15925,90058","16172,83448", 4019.08741, 951.99812, 5370.77582,"22914,14147","17234,9802", 650.45196, 0.00000, 988.07464, 419.84684,"14903,32666", 6096.14498, 2554.06710,"11415,28244","17065,11806", 2036.68952,"14194,16853", 619.81723, 4439.20285, 0.0…
P1SR.3,harvesting time,"15527,98593", 1593.714640, 516.803586, 7585.194889,"18356,67896","21162,485984", 7707.824527, 1033.716290, 6041.435021,"18505,433808","20008,667659","20062,22093", 5997.331657, 1382.289828, 7002.790283,"27982,992691","21546,134275", 837.635114, 0.000000, 1546.286071, 536.816120,"18937,349761", 8146.158017, 2519.439855,"14132,813379","21161,695054", 2444.507276,"17821,41658…
P2GSR.1,harvesting time,"20383,01631", 1419.37694, 0.00000, 7975.28463,"21104,82976","28399,40819", 9993.28804, 84.99348, 2927.18168,"26292,35168","28623,72529","28066,48479", 7628.76468, 954.98760,"10031,54747","40565,88248","28607,74067", 1772.01382, 11.50000, 1025.30278, 513.95511,"26555,33475","11802,56522", 1712.86351,"22337,01487","29592,24052", 1675.41022,"23669,92559", 1272.77482, 7535.23…
P2GSR.2,harvesting time,"15561,35554", 1066.54624, 0.00000, 5249.35779,"16140,71558","21116,29986", 7460.82648, 36.03687, 2502.79290,"19751,55745","21527,96738","21067,43656", 5394.61901, 745.60925, 7258.82073,"30300,24439","21474,38299", 1587.97372, 0.00000, 1035.94878, 401.93005,"19696,57009", 9121.68228, 1010.99512,"16844,13936","22178,80624", 1248.21261,"17728,82514", 831.76776, 6036.80745, 2…
P2GSR.3,harvesting time,"20212,928087", 1096.529302, 16.059607, 7040.118804,"20881,966098","28348,37143", 9388.997540, 88.741873, 3310.818333,"26430,210205","28822,965929","28150,168886", 7211.800486, 913.779717, 9937.508944,"40807,513588","28693,897636", 1711.523331, 0.000000, 1143.917117, 525.531250,"26725,808764","12383,111818", 2159.688106,"21758,318811","29669,093019", 1517.850165,"23899,965…
P2R.1,flowering stage,"18131,45417", 1525.92102, 88.24074, 6054.87409,"20507,83674","25658,84336", 9062.64746, 0.00000, 4614.88808,"22500,53591","24647,70842","24705,8533", 6784.66627, 1327.75641, 8919.41269,"34529,75988","25973,94109", 986.36379, 36.29859, 2391.35922, 326.81359,"23591,57123", 9458.62387, 3777.70837,"18983,69804","26154,68522", 2210.89067,"20133,90195", 2080.10877, 8908.66537, 56…
P2R.2,flowering stage,"11757,312506", 1097.554514, 60.895027, 4255.238147,"13045,313556","16263,062139", 5699.904075, 0.000000, 2641.278875,"13935,171142","15317,446838","15736,185948", 4817.213268, 963.573728, 5901.366568,"21385,595857","16533,634389", 679.280250, 0.000000, 1726.651844, 485.088847,"14762,890701", 5355.099282, 2026.209115,"11841,769453","16662,594612", 1976.903938,"12485,412031",…
P2R.3,flowering stage,"16492,32445", 1431.42926, 68.09796, 5578.27769,"18274,95319","22575,88452", 8867.94571, 0.00000, 3920.20160,"19496,61263","21359,52003","21898,74516", 5904.23186, 1216.07122, 8094.15924,"30524,08788","22885,89925", 956.28743, 0.00000, 2365.37575, 481.10750,"20720,98556", 7553.93160, 3804.86600,"16656,9292","23208,14393", 2080.88790,"17864,40446", 2165.99146, 7364.75735, 211…
P2S.1,flowering stage,"12436,507053", 1073.261619, 26.448493, 3600.395573,"13590,415883","17271,269258", 6400.512894, 0.000000, 3601.403780,"15470,776776","16711,481958","16660,610027", 3532.395181, 578.994092, 5534.591341,"23371,217668","17173,346045", 467.463889, 0.000000, 2044.317595, 538.294788,"16033,831717", 6383.469971, 2581.115339,"11832,241865","17619,788356", 471.386663,"13954,566095", …
P2S.2,flowering stage, 9698.384347, 531.133946, 0.000000, 2716.692791, 9885.558811,"12980,691018", 5042.965998, 0.000000, 2368.400197,"11319,427925","12379,841482","12876,098119", 2758.475803, 731.807191, 4635.055539,"17622,05147","12855,967086", 179.391271, 0.000000, 1647.273196, 4.664266,"12038,628666", 4662.787049, 2117.355646,"10033,096692","13642,669959", 202.594154,"10178,494851", 830.69971…
P2S.3,flowering stage, 4156.664174, 117.189764, 14.481224, 841.457906, 4315.588505, 5562.498566, 1848.379174, 0.000000, 755.108516, 4839.637425, 5220.860744, 5549.619771, 1763.654067, 86.705187, 1624.118754, 7341.545748, 5748.836319, 28.392513, 0.000000, 935.208767, 175.270251, 5096.800684, 1536.781777, 822.540616, 4143.036066, 5873.388954, 507.520498, 4000.460841, 429.211584, 2029.090002, 0.0000…
P3SR.1,harvesting time,"21276,70122", 1420.58042, 0.00000, 9452.62940,"22988,53054","28544,35285","11368,02285", 0.00000, 4557.03086,"24477,22816","27006,83855","27219,53756", 8134.40124, 1571.75584, 9707.61656,"38779,49825","28936,84084", 1238.25981, 0.00000, 1709.19201, 202.65249,"26414,88361","10933,10161", 3379.85334,"20473,53742","28800,49027", 2950.68700,"24054,75928", 2476.34744, 4107.9468…
P3SR.2,harvesting time,"17749,33993", 1117.64336, 39.51549, 7929.56500,"19676,31903","23804,85333", 9614.92829, 0.00000, 3996.35696,20043847,"22102,1516","22649,49366", 7148.76597, 1166.93213, 7900.95749,"32125,60702","24279,61189", 1122.89828, 0.00000, 1985.14325, 336.34151,"21804,99225", 8840.35109, 3113.10974,"17338,36127","24002,25845", 2772.58831,"19842,06234", 2128.40672, 4119.89010, 0.0000…
P3SR.3,harvesting time,"16628,63309", 1175.79790, 25.38719, 7513.95819,"17765,57234","21979,00643", 8273.17426, 0.00000, 3567.38719,"18436,1985","20063,97121","20860,52249", 6896.08952, 1502.29524, 6958.06046,"29572,58925","22290,63696", 763.14890, 0.00000, 1727.62278, 63.18846,"20363,47169", 7425.65517, 2890.82194,"15734,96804","22109,48699", 2835.83670,"18370,19755", 2125.68229, 4719.51215, 29.…
P5RH.1,flowering stage,2.665354e+04,1.568641e+03,4.115577e+01,1.241902e+04,2.719598e+04,3.608938e+04,1.153973e+04,0.000000e+00,5.629542e+03,3.204304e+04,3.508607e+04,3.543525e+04,7.686591e+03,1.681557e+03,1.335712e+04,5.009039e+04,3.597036e+04,2.467296e+03,4.250000e+00,7.182209e+02,3.618469e+02,3.419053e+04,1.410669e+04,3.705560e+03,2.863888e+04,3.745224e+04,2.002820e+03,3.037818e+04,2.632064e+03…
P5RH.2,flowering stage,"16210,7968", 1387.00912, 0.00000, 7387.51280,"16974,15659","22463,93129", 6918.93582, 0.00000, 3503.74371,"19973,12088","21821,7222","22078,85656", 4278.25434, 948.82850, 8000.24500,"31792,33872","22593,49214", 1706.31524, 0.00000, 494.62153, 166.87442,"21135,97411", 8779.60829, 2204.44137,"18344,31648","23324,66119", 1085.79700,"19224,43715", 1468.26919, 4830.61412, 280.7…
P5RH.3,flowering stage, 9559.600252, 922.824234, 0.000000, 3910.057054, 9988.741298,"12479,703162", 3861.428710, 0.000000, 2248.556248,"11206,166151","12187,159359","12294,416292", 2164.540883, 659.340082, 4468.827678,"17562,805215","12486,395856", 1138.135240, 0.000000, 301.004036, 283.244117,"11609,610094", 4957.868778, 1433.717720, 9704.819241,"12946,498461", 868.773182,"10769,418048", 877.618…
P5S.1,flowering stage,"13859,121411", 1214.765401, 79.100771, 5037.013288,"14984,012129","19955,578579", 7151.198037, 41.559527, 2179.545012,"17989,628674","19646,488374","19417,4775", 5349.684919, 631.297611, 6252.458090,"27300,787475","20607,324998", 420.441660, 0.000000, 796.211968, 117.335019,"18647,99951", 7471.405593, 2653.474814,"15396,167428","20553,438995", 2030.734975,"15934,905251", 12…
P5S.2,flowering stage,"13056,473438", 832.926355, 4.780457, 5089.298775,"13991,487256","18992,951262", 6225.378238, 21.069500, 2079.789230,"16800,49807","18395,44575","18282,209724", 4930.617050, 401.281769, 6264.299949,"25674,072517","19329,841587", 394.671025, 0.000000, 959.464815, 238.117062,"17624,839668", 6377.974874, 2655.121855,"14437,653314","19349,910613", 1922.670168,"14935,802386", 108…
P5S.3,flowering stage,"14763,176501", 993.195082, 108.731830, 5859.913452,"16037,511606","21004,992452", 7407.332076, 0.000000, 2320.460148,"18908,552559","20866,073395","20554,470195", 5595.576138, 690.880631, 7736.781128,"28745,875679","21702,680153", 769.637649, 0.000000, 1085.650518, 143.956273,"19868,003207", 7991.392172, 2838.142087,"15760,482864","21747,488757", 1973.397043,"17185,186306",…
P7SO1.1,flowering stage,"14834,021599", 1433.734149, 138.232502, 5548.651993,"16120,402577","19308,875311", 8498.446718, 0.000000, 4487.465939,"17084,541239","18588,497857","18479,528956", 5050.206324, 761.171154, 7567.450921,"26245,944755","19569,993365", 627.556224, 0.000000, 1933.723664, 118.029052,"17818,258664", 8464.104833, 2209.103598,"14159,563073","19470,933831", 1287.584757,"16708,97137…
P7SO1.2,flowering stage,"12969,6985", 888.64105, 0.00000, 5050.51575,"13841,80894","16389,03656", 6658.52996, 0.00000, 3708.69920,"14692,72257","15902,09583","15818,53222", 4380.02559, 982.78221, 6591.90012,"22663,91875","16846,27311", 920.04435, 15.21805, 1551.60599, 233.47854,"15401,87796", 7231.70160, 1842.55163,"11825,29784","16637,65019", 1289.40151,"14215,41793", 1555.92810, 6367.91743, 0.0…
P7SO1.3,flowering stage,"11548,872576", 1280.682819, 11.953073, 4074.018821,"12355,788085","14930,058176", 6050.456184, 0.000000, 3463.230577,"13405,899538","14513,339315","14428,613105", 3923.432085, 494.356938, 5943.552274,"20594,322167","15247,415242", 516.270934, 0.000000, 1289.827627, 46.471369,"13818,374099", 6308.755052, 1547.803656,"10794,046622","15201,124695", 1157.723993,"12980,531634"…
P7SP.1,flowering stage,"18166,721612", 1171.046512, 0.000000, 6832.012231,"19796,824656","25572,206306", 8043.709960, 0.000000, 2452.678900,"23149,179711","25373,626519","25033,713154", 7322.223761, 734.264223, 9077.334479,"35841,274061","26280,616769", 1319.861059, 0.000000, 1293.508130, 779.329941,"23664,164376", 9823.893655, 2030.968191,"19811,139327","26387,868371", 2312.853492,"21308,227898"…
P7SP.2,flowering stage,"22132,391505", 1810.717440, 0.000000, 7897.207385,"24763,47237","31769,319839","10671,393685", 0.000000, 4519.383785,"28938,221722","31474,628406","30933,35149", 8738.711106, 733.043210, 9674.910140,43857743,"32251,555254", 1258.272392, 0.000000, 2163.784736, 680.562029,"28915,905683","13670,334331", 2519.983338,"23656,020795","32526,549136", 2987.892249,"26069,917169", 12…
P7SP.3,flowering stage,"14339,993006", 899.178017, 0.000000, 5607.727412,"15803,039891","20197,756036", 6392.305279, 0.000000, 2400.368470,"18279,131264","19830,320418","19508,574614", 6227.040418, 583.860639, 6144.908482,"28170,524757","20551,510623", 925.980550, 0.000000, 1539.701818, 449.496795,"18521,707645", 7962.006530, 1565.099578,"15636,431447","20551,868656", 2144.380711,"16843,669099", …
VC1SR.1,harvesting time,"17144,59523", 1243.93386, 0.00000, 5224.80380,"21112,22084","28368,16676", 8283.50560, 0.00000, 4438.17216,"25629,02655","27804,49164","26821,54641", 5397.01168, 783.94199, 5965.47149,"38659,44604","28434,99011", 824.80359, 0.00000, 1305.64996, 116.70642,"25896,19994","11722,18775", 3591.48011,"18746,93471","28383,52301", 2223.87557,"24089,13111", 1174.68811, 3433.85815, …
VC1SR.2,harvesting time, 22045.23500, 1853.86997, 0.00000, 7656.45768, 27397.86700, 35877.75310, 10927.57010, 0.00000, 6188.53560, 32333.24875, 35141.55718, 34072.17760, 6711.28469, 749.85945, 8307.81603, 49714.55780, 35957.93043, 1141.10656, 0.00000, 1549.17023, 184.35637, 32697.80688, 15815.99564, 4545.89593, 24145.09137, 36021.12291, 2722.39371, 30783.38313, 1467.49498, 5539.76055, 54.12350, 3…
VC1SR.3,harvesting time,"14159,743052", 946.815685, 0.000000, 4933.263368,"17469,25761","22622,422482", 6870.769445, 0.000000, 3905.713587,"20308,90321","22110,25827","21116,830911", 3666.514557, 729.338513, 4799.842036,"31096,34195","22565,275164", 908.033535, 16.508178, 811.361974, 133.227051,"20595,041357","10103,827477", 2889.090620,"14694,89492","22347,419107", 1759.315095,"19608,383791", 99…
VC3RR.1,harvesting time,"18344,536539", 1238.765911, 0.000000, 7077.994642,"22136,233893","24190,787979", 7532.600751, 41.310369, 4835.210077,"20789,686471","22936,428686","22547,505701", 7107.875335, 1176.162758, 7626.880147,"32878,921726","25847,068659", 1315.136500, 0.000000, 1853.031375, 948.633385,"21415,598246","10244,37913", 4306.239228,"13230,104118","23744,236156", 5775.575232,"20262,056…
VC3RR.2,harvesting time,"17071,16637", 791.35204, 96.16527, 5323.19571,"21141,12247","22600,33087", 6687.94352, 0.00000, 4490.42285,"19618,53177",21881422,"21374,34112", 6799.85176, 893.37484, 6815.48501,"31098,76502","24476,34935", 1250.92299, 0.00000, 1910.55377, 481.13225,"20104,51614", 9987.44795, 4307.78106,"12464,88787","22472,08912", 5842.47218,"19222,14985", 1449.64566, 4341.02344, 0.0000…
VC3RR.3,harvesting time,"11177,122733", 979.760582, 0.000000, 3374.651131,"13702,978487","14339,162891", 4758.380834, 0.000000, 2442.495307,"12245,396785","13720,222344","13650,049502", 4838.912155, 590.697474, 4766.496454,"19813,870875","15660,691622", 613.878819, 0.000000, 1569.400737, 204.268979,"12739,906085", 6175.856065, 2777.467869, 8383.857403,"14363,840997", 4061.133225,"12277,220946", 1…

## Sheet: locality
,"pathway","X7PS.1","X7PS.2","X7PS.3","X7SO1.1","X7SO1.2","X7SO1.3","O1GSR.1","O1GSR.2","O1GSR.3","O2SR.1","O2SR.2","O2SR.3","P1GSR.1","P1GSR.2","P1GSR.3","P1SR.1","P1SR.2","P1SR.3","P2GSR.1","P2GSR.2","P2GSR.3","P2R.1","P2R.2","P2R.3","P2S.1","P2S.2","P2S.3","P3SR.1","P3SR.2","P3SR.3","P5RH.1","P5RH.2","P5RH.3","P5S.1","P5S.2","P5S.3","P7SO1.1","P7SO1.2","P7SO1.3","P7SP.1","P7SP.2","P7SP.3","VC1…
1,"1CMET2-PWY",16704.2400567525,10676.3167170026,11314.0892968417,19953.9478563417,13667.7903330964,11572.8159411463,19562.0483101373,25648.4254605948,12842.4627343458,19869.1740768643,24593.3726336885,24236.4307542947,16433.3714936188,12736.5911523573,11859.1928505859,23754.3816075025,12363.0923710373,15527.9859295202,20383.0163139167,15561.3555435644,20212.9280869073,18131.4541664321,11757.3125…
2,"3-HYDROXYPHENYLACETATE-DEGRADATION-PWY",1268.93726673049,1090.25082347378,1165.66864632705,2577.46287623959,1573.50086973257,1300.8105329044,1357.41096602341,1989.15617160598,688.148702614392,1524.36925807285,2038.6963913236,1961.80704386929,1142.58722805176,1128.62589459093,874.236656256726,2310.8750599359,1271.51029205338,1593.71464003744,1419.37693787952,1066.54624144406,1096.52930196046,15…
3,"AEROBACTINSYN-PWY",0,0,0,25.2173074605279,17.267626990144,0,90.5032618018315,129.164919956837,5.31125964861453,137.3241440923,168.184409188164,6.65418250594558,104.453841737461,107.671756942136,106.652541512384,729.323502519012,418.383882465948,516.803586314577,0,0,16.0596072642278,88.2407384200345,60.8950269525392,68.0979574494331,26.4484933770771,0,14.481223922114,0,39.5154862700922,25.38719…
4,"ALL-CHORISMATE-PWY",6135.46018700426,3804.96722993298,3813.39834858907,7338.54693545028,4668.35903142304,4418.89347547825,7254.50041895756,10941.8344732184,4974.35382985977,7739.24767022873,10130.9711464608,8753.11932079882,4951.57372111841,4063.46870187616,3276.31720157968,11733.7423763482,5879.12844733379,7585.19488883365,7975.28462535239,5249.35779006308,7040.11880415629,6054.87409280725,42…
5,"ANAEROFRUCAT-PWY",17604.0798985843,11046.5577816227,11944.1865455853,20089.937690812,13539.4274689531,11631.7406235266,19735.3995953244,25436.5200683472,12675.421456462,20380.1543501919,26025.6141918724,26168.2950525956,14861.2329936458,11248.8681363082,10206.620491597,28124.436868021,14821.7726120448,18356.6789599967,21104.8297640977,16140.7155778628,20881.9660979971,20507.8367386603,13045.31…
6,"ANAGLYCOLYSIS-PWY",21988.7340573479,14036.6709163635,15079.154544359,26549.6043600208,18119.1677928393,15008.3682392403,26005.4202695159,34239.6666946615,16263.5828665774,26692.5061497498,33998.3725485732,33606.196584839,19823.2586445257,15974.529995161,14036.8618574003,32595.3730872715,16803.5367016699,21162.4859841873,28399.4081926848,21116.2998570659,28348.3714304621,25658.8433582504,16263.…
7,"ARG+POLYAMINE-SYN",8141.78403501594,5530.34106901817,5946.92295363448,10306.4420433705,6666.65812739497,6049.07238835023,9321.34302869643,11757.4720845347,5206.20286251597,9360.9556827219,12007.4619030948,11284.3749024155,6181.17883584529,5046.93302498845,3721.15263689778,11639.6867926729,6252.36292818301,7707.8245272849,9993.28804105003,7460.82648132595,9388.99754047798,9062.64746133065,5699.…
8,"ARGDEG-PWY",0,0,0,0,0,0,35.8290061587738,78.9835243220581,0,300.963188801499,406.458421643828,0,0,0,0,1539.66876373533,876.897076864782,1033.71628995906,84.9934829582033,36.0368655618035,88.7418734763794,0,0,0,0,0,0,0,0,0,0,0,0,41.5595273755246,21.0695000783078,0,0,0,0,0,0,0,0,0,0,41.3103691651095,0,0
9,"ARGORNPROST-PWY",2105.88065350665,1444.57150801425,1425.55068432848,5773.10168161684,3343.19863438203,3149.94106183459,3218.39346060869,5170.99566862803,3213.29355066497,3345.81210363443,4637.49184037528,4890.63839038792,2262.77428737035,1938.03898674388,1371.60432941682,9468.6008093267,4937.82573289518,6041.43502063287,2927.18168027042,2502.79289937908,3310.81833306972,4614.88808449121,2641.2…
10,"ARGSYN-PWY",19587.2735605797,12624.3834624218,13448.3021156939,23897.7215542031,16307.3147172785,13453.0884099824,23846.3217711814,31191.8966254131,15039.1063967811,24252.2264013058,30647.0305234691,30710.9281692115,17899.3426845571,14640.4454591268,12961.0375558261,28527.9751660539,14843.5549211936,18505.4338077585,26292.3516797183,19751.5574499386,26430.2102047228,22500.5359092009,13935.171…
11,"ARGSYNBSUB-PWY",21311.7526329505,13683.1817785437,14566.237700452,25968.410899599,17679.8224835495,14586.1675590241,25943.7413818179,33929.0386006541,16224.7164681559,26335.4074858388,33213.5977980219,33361.9129060108,19442.4172275775,15868.2441805516,14002.004669809,30879.318316509,15925.9005780358,20008.6676587401,28623.7252944308,21527.9673820641,28822.9659289442,24647.7084235882,15317.446…
12,"ARO-PWY",21515.2195483364,13840.4900334173,14721.301326619,25919.7835839416,17498.0283742932,14571.1161377965,25888.3317520918,33912.8437568719,15943.7723947446,26266.2822888971,33485.9558096382,33182.5922967595,20011.6069461174,16405.3574263775,14421.7782370926,31051.5381304532,16172.8344798747,20062.2209302682,28066.4847855687,21067.4365572589,28150.1688859167,24705.8532960286,15736.1859477…
13,"ASPASN-PWY",5474.98194123123,4056.88783467524,4713.4406901085,6998.87412381085,4836.29991147814,3978.53319466202,6730.72302585104,7906.5279972394,3964.74407350308,7644.21814744039,9746.4937671958,8656.47165285514,6341.65279237412,5258.90112788454,4693.49932101961,8783.15247847485,4019.08740987169,5997.33165727795,7628.76468017762,5394.61900881305,7211.80048633707,6784.6662749684,4817.21326813…
14,"AST-PWY",343.097124674762,188.493372189404,423.85928699988,852.876510743984,552.902757906815,379.218405472325,644.823066266286,949.39681457645,521.07006741007,835.057061567624,880.354881720466,542.950071496667,1138.38831286482,708.528221149284,785.041437214177,1765.44138646551,951.998123908451,1382.2898280276,954.987595799772,745.60925183538,913.779717291636,1327.75641038159,963.573727959207,…
15,"BIOTIN-BIOSYNTHESIS-PWY",10490.5041298083,6529.10779046492,6807.3744150608,11751.3048008971,7355.30602338531,6511.2902663793,10045.3725390472,12601.2650353529,6144.98686391169,10058.1884545693,13585.5861564368,11950.9161839525,9519.52432313716,6963.23314705831,5943.80820593474,11137.340473399,5370.77581626261,7002.79028293439,10031.5474745713,7258.82072880671,9937.50894381005,8919.41268513931…
16,"BRANCHED-CHAIN-AA-SYN-PWY",30291.3258419932,19529.4379344537,20793.8016656107,37114.2738028438,25594.0890452264,20901.7491832775,36824.817475324,48599.2399547063,22824.9497988824,38009.0693866033,47974.680871075,47110.5011049045,27942.299304137,23114.9733207645,20355.7740270362,43869.3496679656,22914.1414743409,27982.9926913521,40565.8824761258,30300.2443889565,40807.5135882474,34529.75988128…
17,"CALVIN-PWY",22576.6313883341,14603.8707234836,15680.3239442069,26868.1973317401,18402.4687121669,15440.0794417533,26587.3664346512,34320.8184134084,16350.4022505355,26668.2104161557,34161.0517010303,33791.8026206376,20095.9101623145,16111.1490745701,14250.1159445116,33012.8039299743,17234.9801975856,21546.1342747393,28607.7406717617,21474.3829916147,28693.8976364425,25973.9410905424,16533.634…
18,"CATECHOL-ORTHO-CLEAVAGE-PWY",955.173371572587,513.077594711414,765.081085503646,1072.69261460222,845.917759256292,522.220448090903,1041.42850028477,985.592808629537,905.256697766483,1415.56568043207,1585.05712710754,1347.91539963849,1753.62060536854,1302.89926127536,1242.05752702754,1606.24788091118,650.45196422494,837.635114197583,1772.01381523642,1587.97371781858,1711.52333097364,986.363788…
19,"CENTBENZCOA-PWY",0,0,0,0,0,0,0,0,0,0,0,0,0,0,0,0,0,0,11.5,0,0,36.2985946340573,0,0,0,0,0,0,0,0,4.25,0,0,0,0,0,0,15.218045112782,0,0,0,0,0,0,16.5081780144542,0,0,0
20,"CENTFERM-PWY",1639.97825654741,1643.17955710634,1833.34038127419,2602.0577826944,1609.81413862126,1468.21066770289,1164.67363646375,1292.45381938097,427.755240586572,1921.68094240591,1609.05231352607,1687.49195176144,282.986765823482,236.01725243987,0,1962.35736024978,988.074637612522,1546.2860713523,1025.30277684422,1035.94877866828,1143.91711680678,2391.35922051538,1726.65184416291,2365.375…
21,"CHLOROPHYLL-SYN",27.9477237212967,92.4642744730895,9.32539213278922,20.1042759838159,44.9830111019762,0,86.6736550586189,439.823542317016,319.871461251854,122.538927922174,527.668953206612,233.302595510022,260.592004461341,198.398302183135,0,756.680473504131,419.84684173536,536.816120272557,513.955114061827,401.930050243376,525.531249636512,326.813592781404,485.088847107242,481.107496054105,5…
22,"COA-PWY",20164.7872928697,12847.6026011301,13831.0227856825,24319.380584923,16519.0049777548,13690.9776956212,24782.945791679,32561.5397108921,15395.2638573056,24999.5962149849,31510.5810604076,31234.2742991838,18507.5794702858,14947.4116257989,13283.4250348066,28816.7240968147,14903.3266641536,18937.3497605896,26555.3347460465,19696.5700918777,26725.8087635849,23591.5712322257,14762.89070060…
23,"COBALSYN-PWY",7877.43654487955,4714.2939493789,5190.41493241916,11557.0048813663,7653.85429079939,6507.34283695478,10417.1338739994,14086.7844101166,6050.55117426844,11021.3304423387,13145.1132922411,13814.6117909909,7333.64226690522,5893.59908725647,5267.97222808337,13042.0847602225,6096.14497709296,8146.15801682134,11802.5652205154,9121.68227809315,12383.1118182581,9458.62386899126,5355.099…
24,"CODH-PWY",1376.23596238726,663.516912954457,832.092408284506,2348.88742100283,1485.95065421152,1360.70751067683,2341.29289396785,3063.03001758153,1553.43035736887,2116.03829223166,3053.19616825742,3098.77743259034,995.666121947076,1116.77037302498,736.788411817215,4362.93696870769,2554.06710328209,2519.43985454362,1712.86350982945,1010.9951202808,2159.68810583912,3777.70836812361,2026.2091152…
25,"COLANSYN-PWY",16935.6198082608,11022.0442135588,11820.7252493687,20332.5324564842,14667.5051818477,11783.2921631102,20266.6422007901,26740.744178587,12280.5379755179,21691.0693475564,27047.5048621352,25862.7461207112,16264.037764035,13608.0163924367,11956.522640654,20980.0946223772,11415.2824386576,14132.8133789798,22337.0148722442,16844.1393554852,21758.3188110007,18983.698042506,11841.76945…
26,"COMPLETE-ARO-PWY",22729.1943336157,14635.3414349273,15564.5321858527,27265.0828160588,18413.3201647564,15340.2696742457,27298.5758656532,35782.9820151642,16783.1270006364,27667.6670515818,35288.9234384562,34904.1239304548,21031.0806124897,17255.003273621,15158.366809969,32704.2662524711,17065.1180622595,21161.6950538413,29592.2405161239,22178.8062366056,29669.093019359,26154.6852227543,16662.…
27,"CRNFORCAT-PWY",2117.32232442704,1417.8327854722,1595.72507796291,1001.47940045697,704.203701304178,850.906219423139,1425.65582463095,1331.53986033483,1191.8138420787,1531.30549416291,1706.85097851694,1881.96498773485,1258.89259225012,768.985105242151,844.239858332958,3801.57671396724,2036.68952011717,2444.50727601962,1675.41022068609,1248.21260664576,1517.85016456989,2210.89067292181,1976.903…
28,"DAPLYSINESYN-PWY",18665.3055399974,12103.9199262396,13195.5467760559,22739.3910205067,15340.4025574744,12851.527854505,21948.9285009315,28583.2763660999,13626.7786740775,22885.0675615146,29279.4517991429,28739.3735628459,17739.3787490926,14234.8612764388,12759.4621717222,27584.4018024582,14194.1685324254,17821.4165891607,23669.9255869524,17728.8251423201,23899.9650383864,20133.9019527332,1248…
29,"DENITRIFICATION-PWY",1803.02297172974,1208.07058477969,1220.03817668419,1527.27675164515,933.916319477188,690.324193928903,1540.55190512563,2257.66578830439,1013.39952119108,1263.15780872532,1708.627250724,1466.83758940996,1167.11652828785,809.210394218353,697.133699563164,1934.82070956549,619.817231281961,1362.47474610321,1272.77482355254,831.767759217431,1169.66420617418,2080.10876520542,17…
30,"DENOVOPURINE2-PWY",7346.74031327448,6350.91956782963,6056.16060742018,9898.38531694945,5490.32396873926,5071.139003082,5996.84920761574,8706.67807180505,5265.83941331776,9918.77146203524,13513.2205433896,12254.152618044,9587.67034180132,7394.06377525822,6031.6320656993,8650.45522790829,4439.20284776248,7371.91426051988,7535.23506453018,6036.80745420997,9531.40424069974,8908.66537355384,6559.8…
31,"DHGLUCONATE-PYR-CAT-PWY",48.9943403214335,0,0,369.484693600657,232.194885267017,178.168881972605,184.381057180593,214.27534251094,0,93.776328400112,0,4.99611080993694,835.913447448401,501.174346988783,563.583960573533,0,0,0,303.67027481351,286.574591546288,199.291099019888,56.815138424533,0,211.944350373792,0,0,0,0,0,29.7628362272381,350.778830133047,280.735822217794,193.443501690574,0,4.9942…
32,"DTDPRHAMSYN-PWY",19622.1020420342,12253.7157016031,13070.6322791762,24694.5777050492,16600.0006022286,13528.6805722208,24235.3388697067,33408.636717026,15343.0774085308,25069.1571505517,31726.4813441886,30999.7778597568,19433.0386480321,16231.891294928,14187.5097561779,29883.8312697726,15493.5423325708,18997.8952271689,27492.715070129,20192.8585846702,27051.5824421045,24928.0228281623,15663.5…
33,"ECASYN-PWY",0,0,0,0,0,0,0,0,0,177.282923695334,268.009786799692,0,20.5856936880705,33.116594614915,0,1014.17797091429,586.254854525401,705.878583326523,48.3662930893866,33.3843939564402,51.8532139242094,0,0,0,0,0,0,0,0,0,115.19475122152,72.609088600376,0,33.0995054095414,17.4823683547629,0,0,0,0,0,0,0,0,0,0,0,0,0
34,"ENTBACSYN-PWY",2905.41973243014,1427.36860292564,1323.38810018758,4553.82800255116,2342.85481952083,2716.16438511326,4905.09745395451,7741.98278198324,3234.7374425393,6193.82684530413,7751.60023522939,7188.06632120071,2995.16774072555,2845.29561380186,2737.77281251419,8943.03692185707,3733.27567890698,4943.65893955004,6326.55244069954,4810.94600845904,6170.06130626645,2493.74975532697,1894.48…
35,"FAO-PWY",20523.1421443836,13619.0902877131,14114.6789717796,26382.5119499194,17790.0227633847,14798.4740514434,26769.5853282642,35733.9555916567,16122.1030708981,26037.1124542799,33616.2131810619,32940.1702262876,18703.5854892655,15293.2510814537,13693.3776849058,34989.571211034,17539.5993501985,21644.0201651559,29383.8200687354,21028.4370057714,29028.7482927609,25478.0909207037,15263.8272649…
36,"FASYN-ELONG-PWY",25712.229672585,17238.6101993011,18492.0973009876,33985.1893395127,23300.2050183204,19080.1714328009,32359.2542951445,42835.3402475106,19838.236347061,33571.6823247454,41870.3655302082,40113.4324090249,25076.3639788557,20157.401333364,18030.5193143353,32511.9164554367,16594.2307388848,21089.1355906628,34118.2179115347,25682.7861330562,34388.5602315816,28078.6571959811,17324.7…
37,"FASYN-INITIAL-PWY",12086.573273207,7887.23791637495,8542.19445984777,17276.6152023525,11353.5200329188,9758.86229927382,13769.3607649213,18851.9892631562,9961.69661990221,13331.505704203,18179.7802438304,16211.7063113627,14748.5030697901,11780.812743635,9980.33470729646,13580.6991051922,5625.45083734889,7046.46219917932,12330.5976936856,9552.5342851598,12848.2473833742,9779.71267888143,6364.7…
38,"FERMENTATION-PWY",11582.6512738694,7628.2212278195,7896.53204210625,14950.7294763771,10421.2726647833,8934.58868391472,13205.3064771262,16611.0855679575,7216.81885683608,12636.5434914345,15219.9033749621,15880.1741307911,11349.5372072038,8590.32299966842,7557.0187512442,16320.0711727494,8404.89048414104,11345.0719020485,12384.003625717,10522.4425254404,12298.5523650977,13715.4094328333,9108.5…
39,"FOLSYN-PWY",16907.5192384518,10822.9681424024,11580.1523164716,19841.0124757272,13290.133847815,11463.1581095129,18798.5882527354,24371.6183726819,12362.1995821611,18954.5070370225,23189.1113398552,23465.8111033193,15799.0428570075,11910.1979193052,10914.3893987483,24256.2717007222,12387.6127040202,15924.1648396468,19678.8071433971,15183.5805622805,19672.6659268528,18680.2788815868,11876.6674…
40,"FUC-RHAMCAT-PWY",0,0,0,241.923306000481,0,6.45396204346789,41.885832754557,0,0,35.803719944129,1.61289960172931,0,93.9558972528539,110.561887066622,0,227.531473976864,61.9071536683114,34.8964114655437,128.677775951829,140.676920987358,112.488659085209,0,0,0,0,0,0,0,0,0,170.206892177833,144.384112609311,0,134.02964262985,56.4342563713135,0,51.9773548609098,0,0,73.311319213374,339.272204103492,…
41,"FUCCAT-PWY",196.169907043298,56.603974010513,39.5417005879827,223.005008463643,0,241.850541776209,518.211454989276,514.447139267452,322.003741786931,159.465937919573,287.905467856768,131.2579245656,282.501200355553,235.708265159194,231.852529355808,453.990170488092,136.66629501876,17.0764528465057,111.167396373743,169.974154184653,296.231826788649,923.897665590363,620.370387045512,561.2685208…
42,"GALACT-GLUCUROCAT-PWY",3113.96172778532,2246.95445782299,2762.0405270707,3754.08943353917,2802.25818943612,2467.08384999646,2743.35671826494,4035.74443439581,1987.92151817004,4004.60305350308,5241.1143201636,4507.61716953503,3346.33303234864,2660.22369433774,2442.69733850303,5496.91104315538,3121.9656494573,3731.48323280707,3483.60098241104,2705.79443031944,3545.30973322579,3672.40854118873,2…
43,"GALACTARDEG-PWY",962.201029492537,558.689883195348,565.783226353919,1705.92771059239,1184.54082366988,854.484991187595,1163.18867189469,1868.86396246504,375.788817531529,1882.06624896413,2413.91852636771,1734.1543097323,1344.24063658131,1205.9794943416,875.412863257151,2031.76694334109,890.936436975539,1184.18550196408,1914.53281419603,1382.57673782284,1801.18317451516,1319.74309897795,740.21…
44,"GALACTUROCAT-PWY",4692.22880084477,3062.07996079039,3541.15597312561,6937.06842462162,5263.96172788124,4298.03716535313,5254.11956567184,7247.10417904405,3226.99110231425,6606.77718883647,8576.27200078765,6418.80323222553,5570.29906890815,4611.8226880277,3839.55732214338,8233.05506921543,4695.72930394659,5399.28748850425,5962.55037949225,4513.21854655741,5642.70332814176,6553.73071567455,4257…
45,"GALLATE-DEGRADATION-I-PWY",232.020081969086,102.150205520571,0,719.391345170784,496.412137698453,360.829859140681,568.311642541075,695.698645245727,237.225846963333,262.367368992894,838.151807391993,867.098077707935,1089.74534527599,510.434208302584,445.21880055043,1291.07319954351,641.363700198781,815.509947929784,440.344007828036,505.782873591766,485.579723955362,538.552831183565,449.627937…
46,"GALLATE-DEGRADATION-II-PWY",37.2607638544617,0,0,719.391345170784,496.412137698453,360.829859140681,278.587993122631,380.322326797644,205.589589700876,262.367368992894,528.909526530679,322.506204023993,578.193468723921,358.602091414496,387.090116916891,1291.07319954351,641.363700198781,815.509947929784,193.550952725575,297.986172016741,232.020042790266,458.588889723388,427.948134783458,569.29…
47,"GLCMANNANAUT-PWY",1141.96989606105,737.855916223827,723.510221365232,1194.78870983191,728.389320878129,725.557430895042,579.144410224096,993.433164472081,452.655846642025,1350.20903469196,1651.87343015379,1489.58687117796,839.790853623826,645.151997453779,994.589712412138,2036.92134346894,888.247100693737,1081.39874437068,1075.62687453374,1072.80095920782,1242.08566564687,1527.74385912976,903…
48,"GLUCARDEG-PWY",1069.67508641923,625.658737304283,606.440489324608,1967.28140330024,1368.4032624271,988.091306774148,1304.08056826106,2172.74310969718,445.348624214403,2264.78820820088,2742.8173062058,2040.75712113879,1436.21449778441,1394.15394982192,989.678266764945,2384.51739987387,1070.40086689995,1348.38079406561,2190.22908462654,1577.42734112063,2058.09087523443,1427.88669424106,791.9432…
49,"GLUCARGALACTSUPER-PWY",962.201029492537,558.689883195348,565.783226353919,1705.92771059239,1184.54082366988,854.484991187595,1163.18867189469,1868.86396246504,375.788817531529,1882.06624896413,2413.91852636771,1734.1543097323,1344.24063658131,1205.9794943416,875.412863257151,2031.76694334109,890.936436975539,1184.18550196408,1914.53281419603,1382.57673782284,1801.18317451516,1319.74309897795,…
50,"GLUCONEO-PWY",17952.4903406131,11724.3711733791,12713.4868812138,22041.0162015852,15051.3330890321,12671.1915974899,21396.1363425053,27508.2038277274,13154.3203228299,21711.3991191158,27568.2532165297,27706.8722765461,16302.6041829259,12863.4059470481,11485.5860398942,29748.0280006405,15766.9730561996,19484.1940285208,23137.6842523046,17539.9499596065,23209.8626448194,21267.1513806814,13868.7…
51,"GLUCOSE1PMETAB-PWY",1335.4012129307,776.826179448502,1175.99012667612,2065.73265647072,966.039736354383,588.625059039742,1148.14333764769,2088.92768585354,879.614628979159,2341.67613908759,2698.6378371011,1967.66055473897,3134.71022177723,2093.99685987872,1813.81662952568,2828.74875139164,1147.15493481372,1971.25661406128,2024.56920981607,1812.80640372638,2276.03155523869,2307.31157196539,192…
52,"GLUCUROCAT-PWY",3738.09788079481,2553.60962177514,3151.50598885276,4297.64917326278,3479.15805651489,2920.70608968943,3759.04043602057,4888.25558713784,2813.0056670081,4405.62852000988,6398.98171339363,5106.91877635098,3982.75545522447,3173.88433818332,2896.70713349341,6813.98369084154,3354.21554084874,3954.50352965379,4169.61783988362,3025.55267323595,4243.6644172818,3844.00617779475,2573.14…
53,"GLUTORN-PWY",20747.5368701353,13236.7861363944,14193.0389932934,24777.2799826411,16961.6683822857,13971.4722128036,25159.1361137624,32771.5532418943,15417.409334206,25405.4663603018,32070.7688886404,32121.3936881823,19264.0803441649,15540.1892472694,13764.3629630068,28972.4740701833,14843.6840222628,18806.4422093304,27481.339607512,20554.7351351069,27494.6343440966,23811.2721750594,14885.2001…
54,"GLYCOCAT-PWY",14409.6874486218,9486.88104658283,10208.9138491104,18110.7386191718,12453.1593525203,10040.7692464924,17325.9115570034,22385.5037182941,10599.8447072725,18912.8853179304,23802.4300612695,23790.2185802511,14201.4589706737,11798.7827574627,10373.6868106665,19215.3938269141,10423.3188331304,13326.2544791907,19517.7601044671,14522.7013006798,18914.4788137793,16667.1403874305,10427.7…
55,"GLYCOGENSYNTH-PWY",15605.6908726171,10167.4255226921,10844.0222105294,19557.9176808655,13618.3097395758,11129.6929277777,18331.446785704,23932.7277696239,11189.2780485526,20098.2749502879,24850.6695757271,24755.2437344562,15202.4550826631,12317.274382273,11100.7615503908,22695.8715466165,12220.7089665383,15469.8491048444,20088.7486618632,15510.3459515955,19647.6067281145,20080.1803874366,1265…
56,"GLYCOL-GLYOXDEG-PWY",0,0,0,94.6233966462954,58.8825485316628,1.4532645887791,9.80738092754958,0,0,8.88067968657951,0.359505713208615,0,23.6632663253435,30.5717612879291,0,49.583125256426,13.466958551506,11.4847842413316,42.4502693810052,43.0537887669888,29.5171011069618,0,0,0,0,0,0,0,0,0,44.4270344212749,38.6501098561891,0,42.8043212176042,15.900839667249,0,13.5252093576647,0,0,19.48672361133…
57,"GLYCOLYSIS",19826.7806390389,12733.6354917711,13734.2025894355,23889.4540398933,16290.933463598,13652.5520731196,22994.4293558239,29845.0016241039,14449.4633592627,23475.8094182433,29553.8558330174,29848.3668963145,17196.8686258329,13654.8088659871,12133.4067273259,31579.6940532259,16525.2637004246,20531.8916475416,24793.8685404719,19140.6920560025,24934.4261072143,23640.3212575032,15377.7211…
58,"GLYCOLYSIS-E-D",17555.8629928492,10995.5648374849,11838.9601274689,20155.225734392,13727.374763415,11680.6872348402,19758.2560115358,25716.2099010855,12799.4712767561,20753.9834579148,26360.9126402643,26126.3339660435,15591.2756813028,12114.4700422796,10923.1193061538,27727.1436358837,14653.9678543377,18047.6823005642,21482.5621314669,16173.5905061222,21120.8956664347,20553.8974878703,13139.4…
59,"GLYCOLYSIS-TCA-GLYOX-BYPASS",15962.9289262819,10132.5203428194,10957.8839664469,18354.3106122434,12179.7301440489,10612.4028717544,17326.6389812651,21471.4689093588,11074.8477183357,18352.1651968076,23392.7304541042,23376.1467600899,14547.9749696921,11379.8600967125,10100.2491347426,23621.7065753774,11543.1093066115,15385.1779715787,19288.3434095604,14562.3877336474,18966.1996805066,17636.318…
60,"GLYOXYLATE-BYPASS",14252.1075007276,9270.11681483947,10457.5778139665,15700.0089763402,10756.4168348152,9042.9812594059,14166.7270725939,17589.8896672137,9061.46064324507,15730.0144147958,20650.8647258041,20958.2857100622,12128.9341394009,9987.91550465643,8669.9255273504,19116.6519198757,9799.65964648758,12086.5833156,16987.4008161429,13141.3563982978,17423.9785066478,12555.689427057,8523.356…
61,"GOLPDLCAT-PWY",0,0,59.1419692338868,168.174594379006,98.8441629062823,144.847385728651,0,0,53.1159364676401,135.987810986136,136.637630755016,131.110162278672,97.8159768851099,90.7965421832607,65.6385673346181,175.147792520637,116.394688021798,149.723153149929,88.3896950911054,0,73.8948385918597,209.050670379134,0,182.169383951809,0,7.56148306214991,30.6981852611646,29.2707204045989,0,85.3620…
62,"HCAMHPDEG-PWY",636.773694252702,381.804656017449,229.908325731303,1538.32841404691,1077.67075332863,902.244524641444,985.116674843593,964.143885922915,518.822060801299,632.873054620856,1022.15196186631,1095.90985404966,709.940886304301,863.222386880816,864.982732829993,684.65066052721,328.33849170771,595.308965461665,818.892183138271,633.469877212918,879.309988054819,408.907842057386,193.3598…
63,"HEME-BIOSYNTHESIS-II",9317.7388052611,6423.31679941503,7350.13923872963,11811.0691976796,7919.13334595983,6676.43697433283,11199.6945231348,14811.1233732159,7156.62270245859,11604.4527669911,14779.3260629971,15406.9153721344,9475.44007660117,6992.53255313493,6438.29945225928,16850.3032437866,9282.73006827898,11440.8891886067,11702.4680113515,9117.78063461446,11782.3606395617,12654.2086789855,…
64,"HEMESYN2-PWY",17024.4519732077,11085.5712974879,12364.2309237263,20816.2248628774,13927.8090349339,11613.6340816765,19881.9325729387,25656.3913934334,12142.9559118948,20680.91678899,26328.3687066792,26181.7439994016,15405.4376891227,12107.3492925194,10584.7032282121,26200.4712369443,13638.3008034643,17023.0387363158,21245.6597747482,15752.7618418781,21318.0721287388,20231.5308143568,13006.880…
65,"HEXITOLDEGSUPER-PWY",5834.93631867018,3731.74628094591,4270.82558580523,5937.75601720618,4476.25861094201,3811.41960502817,4910.44614981272,5287.32916807012,2743.55681333545,5077.62751055927,5497.49320378884,5848.22813054836,3146.34269588343,2147.68814792214,1750.01830285906,10053.2718332757,5550.8261575489,6682.7388962286,4937.08700252818,3946.74218875495,5128.63930014689,6137.82850706699,42…
66,"HISDEG-PWY",10766.7559964341,6803.2473819154,7979.32690236187,14199.2242178865,9492.32902867804,7974.69308190206,11948.5281549173,15887.2511629165,7652.54783890379,12721.8156027982,16254.666730267,15800.8130370052,9773.40795946241,8064.34735764653,7152.27331611247,19396.9106147066,10544.5645622263,12884.5509183755,12975.1516888307,9570.76616799052,12737.6948040477,14488.3432281782,9666.661943…
67,"HISTSYN-PWY",18537.7818775202,11866.5404437717,12849.0625901237,22507.9069354642,15176.3705792644,12693.2984698176,22615.2511623913,29548.8829926454,13481.4103658078,22412.5226801101,28815.5922726335,28478.8930607091,16828.780219363,13850.1994028412,11746.4209970615,27607.1684439137,14318.7328051568,17880.1337675686,24290.9238475157,17894.3710212844,24426.1041756519,22378.9923680123,14024.412…
68,"HOMOSER-METSYN-PWY",13107.4061974466,8403.07251854491,9599.1903120908,14663.5693826792,9918.14057629674,8279.49103230573,13993.6334598299,18041.4363366024,9106.1741520716,13090.9610545376,17574.3719561851,18264.8893618355,9502.40284898574,8227.39272402165,6810.94127064615,20558.262212072,10869.9060977594,12974.7544794033,14721.957183858,11615.749563309,14368.9366733985,14793.9275540955,9407.0…
69,"HSERMETANA-PWY",17476.2629655736,11323.224702808,12482.0625178935,20343.2588316762,13852.4276088858,11338.3679309199,19965.1782222604,25956.9929801991,12251.2725075401,21518.0606135008,26861.090590655,25910.4057711651,15361.1893365904,12146.5941960749,10801.3839889581,22112.6414590794,11300.6512031727,14699.9738496007,22275.3825353752,16421.9463009565,22021.5417241553,17103.5278139303,10440.0…
70,"ILEUSYN-PWY",35153.373293229,22747.0382359462,24176.4019134913,43992.4184158689,30564.9323951485,24779.2668382451,43530.5629523417,57230.527676465,26924.5053492164,45433.7616996191,57097.6072965328,55351.1582903901,32955.3057988305,27529.3009742994,24279.1483194099,50081.1777913923,25802.0635921208,31110.8600030463,48457.8049297431,36034.77333267,48556.8416555039,38380.7259843057,23833.703407…
71,"KDO-NAGLIPASYN-PWY",0,0,0,275.483812509857,265.517834406816,279.139124765817,0,0,0,661.602217856826,1007.6026286466,0,76.9495367864967,124.042796169461,0,3475.26402467939,1998.85107730575,2441.69690649201,176.697865194601,125.026745916561,194.056075133106,95.4180413675167,110.786507743975,0,752.533063475908,353.015447238645,0,0,0,87.4413741818468,87.6615839368362,23.9601408561936,0,118.845631…
72,"KETOGLUCONMET-PWY",1798.66919210658,1200.92439301921,1295.23343406586,2060.90175596578,1410.62242882045,1232.49979722107,1497.42664504802,1901.53193156345,882.379300378289,1240.29838527582,2027.6958493433,1720.54572201018,2149.08261673607,1315.76254734091,1137.41679073351,2900.86723342341,1702.45663957381,1980.81511309968,1522.15766944919,1382.59240867948,1346.56733236848,1799.51205425425,130…
73,"LACTOSECAT-PWY",13.9593219553506,7.97637522413424,0,0,0,0,0,0,0,0,0,0,0,15.8807357052323,0,0,0,0,0,0,0,0,0,0,0,0,0,0,0,0,0,0,0,0,0,0,0,22.6604992232823,0,7.98831329518854,0,0,0,0,0,0,0,0
74,"LEU-DEG2-PWY",11316.8529136336,7304.44696447762,8034.69945753401,14053.6312338539,9557.54233318823,7481.38838577835,12888.9565953805,17020.2473791337,8032.35368204221,13766.1857134708,18058.3468800397,17149.5033048736,10340.5981399963,8676.68090656706,7303.38109065854,16901.7200561329,8784.78096983928,10561.0062818338,15087.5424499278,11078.8236897463,14943.0963633463,12848.392268889,7642.364…
75,"LIPASYN-PWY",125.233882242307,0,0,243.343741130467,149.215578732168,182.599350120475,205.364731611379,89.4718626608951,210.08516056805,217.314222271077,211.745876307242,220.759526760592,207.332807302878,254.684007213558,277.86085260056,348.563574937372,0,396.552064587813,267.274662463579,323.77693635683,97.2080368749225,486.349232835052,0,541.03924643553,247.1834197939,0,0,328.761821910735,31…
76,"LPSSYN-PWY",0,0,0,0,0,0,0,0,0,0,0,0,0,0,0,0,0,0,0,40.5388320114963,0,0,0,0,0,0,0,0,0,0,0,0,0,0,0,0,0,0,0,0,0,0,0,0,0,0,0,0
77,"MET-SAM-PWY",16142.4353273539,10518.4360024755,11678.622018137,18734.6557984727,12803.5520512718,10657.7172520093,17774.248425648,23018.5749400515,11281.0529896861,17621.8036144111,23157.1096614718,23282.761613252,13001.9441422825,10944.9680718361,9290.3034723575,24182.3371095001,12760.329787116,15452.3003042091,19217.3036639829,14744.359612663,18849.4112633048,18011.9660235027,11436.16492137…
78,"METH-ACETATE-PWY",529.319453636829,14.8226253472201,108.869841547052,527.404026067608,191.901891187257,149.277294190972,172.955666417052,316.313190628891,0,886.363981394095,1517.46704569536,791.213431587918,107.327064958887,232.947427972675,290.330466411616,99.0944625992839,175.26793849561,225.559688407601,225.308301363028,479.593028453185,777.644932032253,310.230539619431,224.999571770978,46…
79,"METHANOGENESIS-PWY",0,1.97567146957243,0,58.853879629593,0,5.94221328652056,72.9173930532082,63.9395651443545,0,0.988214832881527,116.326053061325,0,0,0,0,148.566141769075,0,169.899961494321,0,0,79.1509099477676,39.1327633220799,53.8475256691912,0,79.8314196229111,48.5752769832088,31.517590280153,157.295731654684,49.6669857252121,169.190283981803,300.903087888741,158.320445670637,31.064884311…
80,"METHGLYUT-PWY",53.9149988644832,23.816038402641,61.6455071445406,0,0,0,165.287475860219,171.680272642439,27.4066179146066,86.4980564419746,115.267320743856,174.565384607971,0,0,7.47095370405089,232.184383839658,46.83671195384,78.1113817260421,242.965270418622,227.881701648382,164.613731086284,0,0,17.6173354716775,0,0,0,0,28.7840648763178,0,157.466537763215,64.6791084691378,0,0,0,0,0,0,0,0,0,0…
81,"METHYLGALLATE-DEGRADATION-PWY",288.584099314568,127.279397740168,0,889.468124098644,614.039477391985,446.673991052567,703.766105601421,861.448900984902,294.624782116766,326.484914697047,1036.03774055541,1071.84894308894,1325.49382706726,627.973874798946,547.398535714852,1591.66114749826,791.788993470542,1006.04253198086,546.463749860066,625.869611259914,602.280159733689,667.444280328983,556.2…
82,"NAD-BIOSYNTHESIS-II",710.252898389195,374.95619789114,798.944083368463,1277.57870401136,1005.62841262944,680.480601420575,1387.25404623165,2106.93021265431,1330.01648874851,1668.52482453159,2139.90462783678,1582.51196587104,1851.4768311501,1483.77748466664,987.02260710935,1907.87271678896,658.815656451674,1533.8198572078,611.799028345628,522.593714313485,934.774896134291,1649.52525794157,1370…
83,"NADSYN-PWY",3780.80456329394,2422.59781273955,2777.00639755731,5479.83668317291,3641.40992296301,3486.09634546064,3160.4537234762,4504.18152415167,2447.50057558674,3364.91885144441,4273.82659934327,4494.78890023405,2931.9501543896,2722.1180050431,1971.26373103183,5208.02090385808,2628.80561819154,3509.35138040709,3189.93360210671,2327.02766570844,3255.98805794287,4192.68268178328,3099.5358976…
84,"NAGLIPASYN-PWY",13920.4837246555,8998.771427531,9638.13827326105,16609.502025607,11096.4784268083,8892.47519510369,16497.2323719357,22127.1941961667,10120.7609368487,17662.8237021745,22235.086959645,20645.5926461848,14491.7845998519,12126.3413207891,10932.5021358526,13963.062502477,7421.61902653007,9705.249974925,17372.2660117676,12693.9987908989,16920.1304575399,14295.5149880998,9221.3201466…
85,"NONMEVIPP-PWY",19089.2032139805,12242.9878451414,12902.446170698,22652.6279727825,15601.363421231,12747.8753208109,22916.8308276373,30572.0094474996,14345.0609677764,23612.7693462127,29739.2024438533,29280.4940671916,17277.4447101867,14265.1148642053,12557.6248016051,26981.8056945644,14091.8043039028,17772.2448252691,25254.6775365229,18994.3167079161,25273.8822265673,21597.9320027679,13474.17…
86,"NONOXIPENT-PWY",27310.7760437407,17888.7259038038,19406.1979220566,33006.3297113764,22768.1317906423,18654.5959926827,32557.2710229594,41392.0288058389,19921.358865392,32842.9177769045,42309.3607216654,41074.9003448989,24262.990103276,19837.7439200099,17509.4960118845,39786.3510921251,20831.7741997781,25933.1714693176,34703.5143945773,26042.3891750872,34748.3530112239,30657.6055664579,20006.2…
87,"OANTIGEN-PWY",18615.5379267425,11796.2023613054,12701.6422236422,23099.6878860528,15507.6237737126,12708.3071638376,22904.4710679572,30280.2673411693,14033.2648102137,23087.7952869008,29511.08766681,29437.409101897,17127.1819663738,14088.6079293419,12327.8980409861,27661.5210586189,14427.4493915851,17759.1273874601,25186.672930411,18743.547032355,25179.5386160608,22445.6381891354,13992.541090…
88,"ORNARGDEG-PWY",0,0,0,0,0,0,35.8290061587738,78.9835243220581,0,300.963188801499,406.458421643828,0,0,0,0,1539.66876373533,876.897076864782,1033.71628995906,84.9934829582033,36.0368655618035,88.7418734763794,0,0,0,0,0,0,0,0,0,0,0,0,41.5595273755246,21.0695000783078,0,0,0,0,0,0,0,0,0,0,41.3103691651095,0,0
89,"ORNDEG-PWY",0,0,0,0,0,0,0,0,0,591.795918175029,669.434886548647,0,0,0,0,1991.00206431801,974.48064752325,1124.64492676239,775.021703750427,476.184603972485,555.217527716198,0,0,0,0,0,0,0,0,0,0,0,0,668.470999016916,586.827225083521,0,0,0,0,0,0,0,0,0,0,0,0,0
90,"P101-PWY",2103.99118715678,1381.12853728594,1265.30810773441,2457.41473447384,1408.41494465172,1511.79920755798,1447.87789554152,2022.95766477504,1565.30894499752,2089.07828449835,2422.19163642111,2954.37329996032,1702.2376438041,1631.70937781023,1209.5868748821,3212.66338094833,1025.62323103675,1946.1254845018,1902.4684804221,1829.68048940178,2139.70844410942,1407.92171611586,735.66999997828…
91,"P105-PWY",20848.9592257006,13315.6388054711,14384.4312359015,24933.4239192802,16788.7197045865,14237.0363391528,23897.9896438714,30083.4886050444,14989.8042352993,24771.0149889025,31390.1055784734,31352.6518951648,19274.2952816492,15243.1338416644,13555.8273020476,30703.6100459643,15142.1070422626,19924.5487455613,26397.0619460602,19883.6624906193,26222.9734675297,23381.2546867658,14480.55798…
92,"P108-PWY",19020.2545458092,12162.8487479635,13653.2743489361,25868.1914974249,17604.230193594,14377.9932249807,25094.6845220596,33008.3520604025,15208.0123425693,24554.9801442333,32055.1211258901,31566.9615894996,17126.511233927,14254.2470334963,12599.0131547302,32357.5115579658,17171.1562994699,21101.2648178331,26440.581634631,19565.0140939372,27007.157208827,24581.5892760903,14985.141665618…
93,"P122-PWY",7906.26854354703,4756.9030728107,5215.45368265565,9122.21774779244,6511.26152412599,5500.33781046816,6723.06654960953,7509.93144859083,4974.15417733685,8123.6141773619,9134.03946041571,9547.7347686072,4302.58721254738,2748.50391493979,2965.37235921569,10687.5323467476,5429.11882805949,6558.50297288435,8319.41059826775,6830.11130508967,7440.22046777121,7573.37694370213,4955.413044493…
94,"P124-PWY",12391.2316145166,8067.45287749294,8815.02019656284,14317.5508918526,9587.6607251828,7321.67272628197,11941.3597718005,15598.4320954546,7912.01633715661,14310.8883187419,19357.1316167718,19487.7755629743,10378.2490247034,8853.59818835405,7727.64077124685,14725.1521104225,7423.16827637953,8833.7177166527,15716.9928129779,11982.4804990163,16350.9612003525,8919.19846775004,5612.85171705…
95,"P125-PWY",1732.72546262715,1084.59747283985,1355.87824805053,2942.9166341485,1924.03504440004,1978.38781746474,1983.71193924511,1834.6783964654,1220.71106567783,1630.07509492269,1877.22651991827,2296.83990678923,1740.22551411618,1098.58405488354,1224.22680851876,4039.02026876712,2254.47932479278,3173.68964634278,1534.11284154343,1539.93783677323,1398.31820998396,3253.02212324715,2348.93833636…
96,"P161-PWY",4289.52382583465,2414.22039445983,2674.66658003547,9352.34024341152,6598.63562444551,6308.22298894955,7519.23891967396,9063.0562665598,3481.75950430886,5776.67119899332,7326.25599615226,8383.14796777986,4288.77115253586,3822.31855539622,3415.40781113582,13136.7067541444,7118.27386241693,9099.29177531308,5615.41857440366,5696.50202126767,5865.73438615563,11241.2744253491,7233.4881208…
97,"P162-PWY",0,0,0,0,0,63.1866355062309,0,0,0,0,0,0,0,0,0,91.1621710049808,0,47.6438034352946,45.7453874414573,0,0,200.906522844507,59.2534292486705,0,0,23.8621903447165,0,55.634401429919,71.2518102219628,82.9402794746543,16.9621553759483,0,0,71.1060018482297,63.1376070629262,0,0,45.6615638940611,15.9510020253942,31.8672839704782,0,0,122.212215893521,250.278204157196,49.6446159096854,0,122.09947…
98,"P163-PWY",975.134126933711,626.367494548351,519.282475306015,2622.63810855033,1997.81062629,1281.01803832315,1297.51387004412,2659.68362573056,1607.37344972396,1627.55564854458,2187.97948463401,2455.83996025248,1159.7363824705,948.517088493189,1003.6788377609,4844.34410404098,3019.67364218202,3732.00256399341,1603.36558602705,1503.93114566201,1646.20685524024,3397.9833364462,1760.2620872439,2…
99,"P164-PWY",11002.8593054755,6578.67904316606,8282.26328320574,15092.3025004699,9389.64786902278,8139.2856257039,14797.9954901508,18762.5264053667,8340.21598861339,15172.2923898992,19842.7586568474,18599.3121335305,9479.79676623609,8965.13270051093,7600.77729936525,17176.5097406333,9244.02820034948,11551.1756978394,16364.6043003322,12054.4643801406,15365.7474711074,14958.7421061328,8937.1849415…
100,"P184-PWY",237.207529883871,112.447191272825,0,579.873368723843,295.493756295322,13.728206376884,480.83774115111,724.189722219388,201.509931898844,262.239181437975,919.71855927675,994.280964192689,1078.11597795255,414.434300836556,464.712778981664,1223.74471923371,540.771776459189,559.570289495568,477.484225644148,577.758564580469,562.529040935531,606.159355266118,508.740919626899,748.6872716…
101,"P221-PWY",1070.05014651729,553.793979896547,302.286315376576,1776.22857496574,1277.6355648454,1069.53995171502,2754.84189798904,3955.71281225598,2016.37880827839,2274.5148931173,3742.78913462187,3600.21082830425,1886.86901699992,2609.33727643452,2649.82321442502,6124.72140084288,3050.18132759346,3553.16500761675,2596.54436662188,2324.75161793642,2673.78853719107,3608.90903857274,1394.2202335…
102,"P23-PWY",18955.1141107698,11780.5701422305,13207.8917739274,24192.6017203128,16268.0613605647,13577.7163000429,24440.3408928814,31705.4156317063,15228.0853882129,25092.2003942781,32270.0597640512,32094.5273061301,18164.0718812756,14902.8395898741,13188.0599819034,28724.2295177483,16069.8796320107,19244.6955788325,24575.3088469908,18785.478766371,25032.3130863586,25915.8798998568,16417.749815…
103,"P241-PWY",498.726572780232,339.444939777671,317.22365462356,281.664929944973,130.088893935772,48.0740240807732,390.708950249417,451.62390902906,364.739545605334,657.406106399653,704.700329466508,715.226828460164,187.70048242327,196.903046788935,164.23379591024,523.829028731407,154.205166196529,267.937799276022,713.781814976953,569.662356666526,828.994872579109,415.756164058015,293.0266486032…
104,"P261-PWY",1032.49864054593,717.206412962488,649.183320311447,1327.17830424341,752.533345641306,582.716735081396,1208.32601418661,1479.79574194905,927.982401128962,1540.08988312914,1857.33582379261,1370.57911034866,664.017506875707,598.939548849123,592.438519501829,822.063235737713,264.184959675153,615.200716186316,1341.34531845024,769.890333927006,1252.93279666733,776.765822519837,497.856763…
105,"P281-PWY",3309.75125011624,2399.84836685221,2616.61454563842,3808.04332910553,2776.91489801132,2291.0719692058,3096.8083730081,3789.90802230904,2038.38695388488,3585.95097232384,4508.83866360754,4462.63612646657,3465.90800984016,2681.64189545083,2791.06577380096,3669.36431521378,1628.43279514181,1910.4700929422,3514.85807418548,2835.30356760935,3846.76994772083,2568.13255827617,1831.33529051…
106,"P341-PWY",0,0,0,0,0,0,0,15.620830166553,9.37183991472224,0,0,0,0,0,0,33.1051445251018,0,20.6130418204858,0,0,0,0,0,0,3.74952674839896,7.49744158183665,0,0,0,0,48.3113631396661,0,0,0,0,0,0,0,0,4.99943141515194,0,0,0,0,0,0,0,0
107,"P381-PWY",2355.42184459979,1767.8151442924,2142.71636943528,4131.31927184457,3215.05363705846,2600.35145323447,2360.94841577364,1968.38932607431,265.602371562198,3261.33483090058,4006.70069626975,3392.8328070559,1755.45205838423,1084.78987433255,0,1827.51596789642,728.760909310004,1038.47217013162,3234.48667030865,2864.51458814848,3111.22640634371,1275.95488950822,1310.40692185859,1426.93079…
108,"P4-PWY",17649.2032288575,11429.67464941,12395.5679697957,21027.571094904,14242.5826916549,11820.6235321018,20273.4355103726,26314.111709639,12716.0910701475,20318.9006917269,26249.8240090031,26232.7655201639,15283.9725874147,12513.7573657537,10945.7396577356,26224.5945650296,13741.1708638973,16972.7180276386,21794.2206477425,16519.2036105267,21709.4145578251,19513.1364408916,12369.8914392974…
109,"P42-PWY",16171.9572529726,10146.3279146863,10814.4110290643,20610.7909226168,13594.6555122117,11330.0361017476,23115.6330693626,29278.6617413267,13151.5904742213,22229.9822606039,28868.3790739005,27326.6156125692,16617.6282720671,13740.5025818265,12193.0983083321,23879.8767637877,13930.6753788687,16007.0577911938,21312.9784069411,16437.8856245669,20642.5850710497,24873.5824139688,14802.75467…
110,"P441-PWY",2549.24560845981,1742.47429791045,1731.45363901673,3127.13986957573,1993.36955446841,1919.81536021387,1597.83394517387,2544.15911652248,1203.85872976572,3262.55474928152,3950.21524982784,3565.23079952403,1789.92904548281,1512.0489814936,1494.82935643936,5114.98874500329,2337.03283466447,2870.03539539402,2595.48552888347,2546.56764936077,2892.50232142431,3805.08917759814,2322.540176…
111,"P461-PWY",1935.36120464056,1739.62685605371,1741.22428512382,2559.5404935062,2159.00792743367,2198.45025349665,1703.41636014691,1629.84899009991,884.618667371605,1833.25417183621,1728.49889979071,1826.41557271181,941.741746755259,672.34434291461,569.505124419898,5959.82810141217,3348.83963191611,4024.2263378889,1515.19479986679,1344.30978321007,1629.87973185274,4021.54315541291,2853.60914989…
112,"P562-PWY",2572.82408140318,1510.20832402185,1736.4112205252,4182.83608392645,2793.0991088654,2442.72458707077,3397.99527302455,3765.85870412089,2550.17178986968,3010.93531076324,3719.66057471904,4169.76408947606,3024.43636600446,2478.20365626347,2390.24111401484,6803.17486691739,3335.29217946372,4026.48521082015,3312.98578312072,2699.26349283722,3342.28196486284,3465.66144622938,2364.1654982…
113,"P621-PWY",1199.13786082342,926.74203266046,1051.3258711871,1514.36496350365,1452.44355909695,1092.57048775468,1229.12455516014,1489.36686258463,902.066151311621,1431.72830701308,1886.14106382177,1610.93702698843,1116.5341280523,994.098470363289,865.129334067144,404.646703138497,186.614987080103,253.89199255121,1503.15983056808,1221.70897362929,1510.73463671709,563.7089678511,307.142419601838…
114,"PANTO-PWY",19633.7011886312,12681.3931147237,13665.2304791392,22832.191268522,16054.202307559,13239.9549346368,22721.5771022017,29975.374713761,14431.3911107713,23707.0607891693,30047.278216465,29882.1575725855,17920.9641396093,14371.1335615963,12890.2869031446,26805.0417683655,14079.4112087949,17408.4006018456,25145.118798155,18876.6340016124,25465.2886058823,20745.0467349373,12892.30319854…
115,"PANTOSYN-PWY",19033.0439222321,12565.6216142476,13227.7941282588,23182.2908918987,16101.3200407771,13278.9376540792,22737.327746862,29760.3016025713,14097.0308597386,23470.0035736929,29497.1539705152,28865.7388811953,17523.5771961345,14289.8664242705,12663.2644726598,25736.6639045303,13245.2963285051,16665.2683748443,24933.7284608987,18797.9141477975,24992.8206799592,20314.9627452911,12729.0…
116,"PENTOSE-P-PWY",22889.5584961774,14956.7072356304,15991.6775209474,27136.7033876854,19094.7429022036,15543.4303311334,26261.7294044106,33624.0565820339,16497.5738352242,28003.6149136859,35170.4721644998,34661.6587902867,20930.079940386,17037.9666894085,15128.3022304441,32180.3482069742,17006.1287012245,20830.4587966178,29437.7950393209,22247.2307088692,29289.7173751592,24332.4527683291,15558.…
117,"PEPTIDOGLYCANSYN-PWY",19046.0909483784,12325.9024493989,13256.7386737747,23371.4469566799,15741.3941098619,13161.8657822751,23216.0687395303,30107.2329365383,14140.4352430628,23245.6439220604,29582.8069806288,29660.3425823302,17131.1356753878,13584.3824663892,12093.1342841819,29143.877740853,15219.7061662696,18894.3534920084,24845.911765233,18282.3253053128,24893.6396516227,22984.9310341709,…
118,"PHOSLIPSYN-PWY",25432.3902212474,16232.2043318001,17491.2731416412,30835.344367472,20952.1471198759,17334.404051201,30982.0184706586,40629.7506475805,19089.108003952,31442.5584692728,39836.7927369419,39832.31756838,23224.5425046459,18796.236106842,16769.3918544879,36904.1076257328,19153.7820608717,24042.0086549418,33541.1522268003,25010.1051260993,33493.2097820966,29693.9541232153,18673.4651…
119,"POLYAMINSYN3-PWY",5295.03694508432,3625.64605824017,3961.37243976124,6627.33564734065,4237.95544266849,3932.77668771146,5851.92683229808,7370.83377005173,3207.77940885879,5910.93775797115,7625.88543514203,7057.57747435107,3815.3682209806,3127.9005465723,2217.24612793539,7173.09178207105,3848.22520863124,4773.6212738772,6302.07215256515,4712.08764417303,5840.52308152803,5608.18023833108,3585.…
120,"POLYAMSYN-PWY",5157.71230870083,3551.20773664498,3825.69955276509,6591.13762841865,4200.87967555301,3915.25329232469,5818.04748630438,7270.48323588699,3163.69570030878,5815.26002687181,7484.07759273825,6937.04467649097,3741.35959176025,3050.38003779072,2173.58874329102,7366.35622377832,3988.49105784536,4905.21559732752,6189.88730993443,4618.92424735287,5729.09375910212,5697.83382129156,3595.…
121,"POLYISOPRENSYN-PWY",18867.3955172868,12049.409920632,12679.8504259224,23894.3203045686,16200.7875262298,13173.2354190515,23376.3759013425,30872.3002182382,14665.6932765476,24091.4050986548,30806.3763989374,29973.54736032,18037.6097550545,14906.2004721197,13060.7528317213,27654.2991972184,14410.6627061145,17857.7916610823,25214.6635461047,18576.9214385974,25280.1326966896,21481.8369792974,137…
122,"PPGPPMET-PWY",5689.05196131155,3489.94972415682,3749.34595317218,5291.99371277954,3765.70661184039,3542.55497212715,5032.78500704402,5938.74715468373,2940.14433670481,4218.29604508154,7323.95237635644,5632.99949573981,4771.62890075444,3716.7579268096,3145.80194879735,3434.6741528211,1653.33362328409,2271.36290509769,4930.2335192893,3731.00710050797,5053.48640080303,2609.84485071555,1482.4127…
123,"PROTOCATECHUATE-ORTHO-CLEAVAGE-PWY",8604.37839689695,5998.80044116731,5890.04892331107,11698.0588176448,8322.0797177512,6833.10938443898,10893.1393435525,14370.9110650459,7686.82951692871,12293.8749762299,14841.2154736123,14613.8630305399,9211.47505483175,7993.0796920885,7352.03568063886,13301.0116221932,7009.8315126404,8035.59882247522,13463.2458500078,10195.702635904,14014.2009037347,8091.…
124,"PRPP-PWY",7361.70807891595,5935.91610718806,5888.8918442176,9709.30373973655,5929.25929978351,5357.21083105552,6762.34203653542,9555.80414789336,5143.15701308157,9799.9743939102,13299.7113607313,11907.9606332829,9012.87248857495,7079.15325795048,5938.78966303881,9355.65577164799,4655.43335980987,7057.18796141147,8217.79366679265,6472.68375379944,9638.00297518325,8633.48359584128,6347.5075529…
125,"PWY-1269",12897.7261252235,8372.284569685,9010.6234762529,15350.3492299671,10167.141414034,8279.56074027954,15414.0218351898,19853.4249955595,9163.69996479998,15969.1577300375,20500.2384351579,19132.8702676132,13088.8917907325,10567.9969767194,9563.20208591993,13592.7658189011,7261.64490137184,9524.40446780576,15752.1257658384,11406.9984302841,15242.0615784377,13706.9729159647,8780.702862985…
126,"PWY-1361",0,0,0,129.94401700733,0,0,200.684076451012,417.035536601366,67.2082781287774,307.757632293434,254.472385198277,467.464077960161,673.02816332603,584.997075301092,497.868853074751,0,0,0,252.835229750374,302.530380649844,190.696144215761,0,0,32.3593701300522,0,0,0,326.197891184089,0,0,582.126364109075,385.464321529936,237.460663875263,0,281.572603527995,284.417797672136,336.6735489179…
127,"PWY-1422",0,0,0,0,0,0,7.14506362670802,0,6.39730403409541,0,6.63414265468588,0,0,0,0,5.12674208150926,0,0,0,0,0,18.3287271653891,3.74490589825183,0,3.74251933534507,3.96184777161406,0,1.11275008857747,32.192752336413,0,0,0,0,3.34211742204707,28.7778992539253,13.8176048354779,81.5393781750247,96.5749137781883,35.4728571277172,37.5339355013519,58.8701210465888,19.9528493767987,0,12.27343463256…
128,"PWY-1501",463.726779455553,398.727644834843,282.01599259753,474.339256739481,533.977131047117,301.216059016434,554.301385098024,697.824921751715,121.674887711309,640.729804719131,979.347686731524,807.9668151829,509.237464510402,488.387086737842,132.316217502294,304.128717311219,140.245420094006,146.586555685159,807.505465599864,601.177561413964,682.989431949622,225.140540300848,151.568690421…
129,"PWY-1541",0,0,0,0,0,0,0,0,0,0,0,0,0,0,0,166.515166974467,0,0,0,0,0,140.920117931334,158.750312547664,0,0,0,25.7028561929649,194.184423928459,123.553742995477,330.001260243317,0,0,0,0,0,0,0,0,0,0,0,0,0,0,0,38.6031366041511,0,0
130,"PWY-1622",1870.57424805354,1333.47243533566,994.938703611828,4010.92022237627,1985.62979232175,1643.9702418144,2407.82978883531,4221.13863376792,1109.70662328315,3033.25215640976,2968.75491089775,2666.92554245481,1500.81621319912,857.045347384613,425.220548220918,1760.99256763338,1318.05333647821,1275.76558862167,2037.50079586774,1163.05239479781,2466.10762467702,3068.71836332431,1455.205943…
131,"PWY-181",7108.03138706224,2844.18745142601,4770.81712153346,10982.0009047082,6963.23962473416,5784.54745098827,7773.61933396968,10808.2827822715,5265.128690708,10202.0013705856,11789.2323548984,9504.23838032042,9050.32534382407,6928.78629862309,6540.93260504227,9122.52124770997,4998.73566104635,6098.08369910638,8528.48884377216,6780.8144461929,8981.68276929915,9507.37128479642,5863.213913801…
132,"PWY-1861",3315.02760860274,2784.29600448587,2916.41664098062,5307.30545723028,4313.67604014005,3727.07651380478,3863.10336254702,3498.59967742764,930.754265068571,2295.76024887844,2146.36704346904,2369.48988667908,2463.72004602208,2022.09104005112,1694.40578134328,4074.38035836195,2147.70671640756,3845.58725249158,1903.76037423356,2445.77571465956,2566.18113687245,5088.42741535829,3275.44202…
133,"PWY-1882",654.706165735388,498.947021757118,208.189821442536,1228.94706037128,702.450843740699,579.557553778568,493.255048200176,1388.27802349359,602.892251730078,535.829119613254,481.151919943261,552.105893159851,579.954682563757,137.84002369721,0,297.588535487029,0,40.1687314943426,528.643795074534,326.487811582055,490.139599609628,549.65835998332,279.633586060286,267.188113851932,191.1353…
134,"PWY-2221",0,0,0,58.3811489694242,0,0,53.8852614352821,28.1016416645244,16.8576902761417,0,0,0,0,0,0,59.5055889499933,0,37.0489919043176,40.4447982083963,0,0,0,0,0,6.74692319014086,0,0,0,0,0,957.061296096006,670.609067083853,633.932512856183,0,107.341070658834,0,0,0,0,0,0,0,0,35.9545667010131,67.2357909417645,129.750037147757,0,0
135,"PWY-2941",2411.60591128779,2425.0951259216,2887.84338128573,3095.77005168556,2520.26943945971,2608.10108380884,1548.39748757718,1318.85953737433,502.721179240933,1971.80050920598,1505.54061832026,1933.99673557219,300.818080327411,292.311142534979,0,3449.83840675129,1847.69247915911,2698.98853862192,1499.46889370297,1704.41335429908,1740.60850744967,4437.54314885666,2855.75353502757,4093.3934…
136,"PWY-2942",24130.0940346803,15523.4504523688,16454.8351710559,29675.4324490067,20381.9326610951,16856.0806650883,28453.9129124332,36983.7133266875,17693.5697833671,28834.4248476429,36896.3650151849,36329.8008758024,21963.6214891034,17972.5381332799,15899.3209660724,34721.1876466701,17960.2860665191,22638.0040984296,30533.8170474397,22872.6547274196,30574.1835830188,27142.3862296866,17119.4255…
137,"PWY-3001",24688.978103308,16127.5624533142,17256.6723064581,29793.2597954521,20548.6476146706,16917.4562270398,29149.745370107,37994.4956198671,17824.1739891783,30671.1438047495,39000.0126210245,37751.8553613508,23062.9256541586,18943.1036259839,16672.6122818119,35301.6732756106,18508.1246946946,22982.2640120708,31875.1667582591,23806.6515996577,31839.3691524391,28246.3999880171,17925.213904…
138,"PWY-3661",176.336009701908,141.322643273806,574.262027392861,1096.50129168463,1011.70301299344,489.402466632251,1264.41158233136,1441.78389765771,401.14547882033,1221.60160537567,1302.77178147022,1936.71147510222,2100.8902265222,1648.57637000551,1558.52173706457,1520.57060565112,237.503935999782,297.391005152781,930.552482287155,203.417023100112,740.721389760142,1051.50999937191,634.27920140…
139,"PWY-3781",63529.5046877018,40661.223541377,43477.5298604123,77559.7708127824,53334.0197539614,43325.4888274505,76078.7987301604,99327.1797420252,47502.2323524858,76887.6019988162,98623.743557133,98688.6075327844,57959.2435137988,47796.1394640748,41773.3105570092,95807.8567994456,49532.88014004,60910.7637103541,83055.1920446886,62072.7392680075,83369.385606564,72007.84109924,44912.9416326866,…
140,"PWY-3801",353.637176232139,668.12862011974,421.754028846938,513.391449797658,437.558150294671,683.511911224203,29.9599336422926,0,0,2101.51201372442,1656.35570079146,1194.78479077143,0,0,0,496.787566904609,395.125134398116,0,656.636332295672,251.540855464065,369.253776787666,2318.38829108689,1392.29282214204,1844.90420266415,2051.90548687674,1593.61619247484,0,714.734539668845,781.4095233213…
141,"PWY-3941",65.6073865497236,118.747251535995,188.048525490596,239.685782590576,211.430792360013,140.316863972814,80.906706587118,215.796023970372,0,323.447578245127,451.966757465255,362.242672711674,191.845582762626,171.954276720545,24.2745630325449,0,81.3923456234829,0,353.227986451764,244.97454602347,350.285193973044,0,29.2496627343169,0,0,0,17.7543346732712,0,0,0,370.54537695656,247.765619…
142,"PWY-4361",597.41226901554,417.012907833228,688.273019291606,1078.00942746498,798.784734147579,932.667831395217,721.524171915068,635.734031887307,235.301516969533,704.516504973838,494.517984329317,651.921894283542,0,149.892814252451,0,1671.85424580895,895.84327740648,1159.59176430897,426.370684413539,478.02791867694,590.032916823256,1924.42026915593,1267.41810185719,1772.34344260358,1163.3552…
143,"PWY-4722",0,0,0,291.307235590469,184.380966074144,219.153164520417,0,0,116.290272691044,0,0,0,0,0,0,0,0,0,0,0,0,104.567476113687,0,0,0,0,0,0,0,0,0,0,0,0,0,0,0,74.714059040819,0,0,0,0,0,0,0,0,0,0
144,"PWY-4984",10361.3941490758,6848.48733052391,7878.30708794929,13550.2668223955,9186.93655876932,7742.73391377397,12270.6003192742,15535.0231664244,6606.79999489664,12509.5011464344,16124.6318413979,15767.2687693903,9500.07071366759,8371.07221398217,6819.30142430831,14980.4889286444,7425.67425213931,9670.86556271457,13574.070815401,10020.7426546915,12958.5056670917,12933.8563405568,8391.246667…
145,"PWY-5005",0,0,0,0,0,1.75179217873954,0,0,0,0,0,0,0,0.311993838773703,0,11.9942382465319,0,0,0,0,0,23.9699572149414,0,0,0,0,0,0,0,11.9920208311502,0,0,0,7.19671057030343,38.2963019555998,11.3923942503317,0,0,9.59317694085744,19.1835465643979,0,0,0,84.9495136421761,0,0,74.0420908215239,0
146,"PWY-5022",9265.32790681709,5938.65115382228,6737.01116765748,11548.8019945365,7862.13746592288,6906.23563396848,9891.58576461656,12045.9976174724,6588.67791151706,10154.3857719283,13048.3181839894,14066.1506557808,7840.5262252264,6153.21017616301,5764.61081534397,14724.3463702367,7739.18908352683,9688.60238840197,10845.4859006511,8823.98477320706,11346.0268612531,10584.8671344121,6662.022967…
147,"PWY-5028",4426.30542432201,2792.77066608168,3054.32987178314,4234.74374992764,2518.9604084258,2068.88695357392,3327.99828119491,4654.66826194978,2563.76343302455,4385.42330655846,5307.95966712454,4799.33954137959,3609.1875555075,2914.51747582779,2477.5836021,4282.22784495126,1522.73304346758,2238.19071723423,4784.71578925673,3561.09741829928,4658.91047243109,4083.99554474546,2688.23188333128…
148,"PWY-5088",0,0,0,0,0,3.18055219385868,0,0,0,0,0,0,0,0.584678164749169,0,0,0,0,113.929722305407,0,0,0,0,0,0,0,0,147.972720483696,0,0,0,0,0,0,0,53.1914978539416,53.8660725011117,0,0,0,80.9688655307928,0,247.116540771093,223.080605217863,133.395644270986,0,0,26.3858327740759
149,"PWY-5097",22625.4899102764,14600.4441183377,15572.3717036664,27585.4016147711,18902.4196782193,15694.0680249178,26903.5448654072,35021.5025156533,16586.6215337499,27352.6391696417,34789.2533156717,34151.0385269097,20879.9923134543,16997.0989650831,15116.9932995317,32137.3754570644,16737.6257145073,21135.6103277572,28753.4202523797,21557.8315244759,28696.0884321184,25510.2825866025,16081.8354…
150,"PWY-5100",8915.48144964819,5689.99206761313,6322.77923452133,11979.294462537,8006.79732151654,6689.11820853313,12047.1662809116,15311.1450813141,7111.22275729907,12343.0291811613,15160.5534292329,14831.6173576482,8866.41177046221,7568.94503788159,6647.20790594131,11188.6454359019,5880.79971019163,7644.34722758118,11010.2496712068,8651.67317637688,11283.5995774993,11789.0473425633,7340.797020…
151,"PWY-5101",36144.0352767924,23361.6736304885,24768.8437741748,44594.8479336481,30874.2670118636,25009.980601114,44253.6709225248,57975.1586776069,27150.4000662588,46074.2435588173,58166.5107165297,56357.9002488726,33786.8412574426,28046.7221403467,24688.6523075848,51108.7772109164,26456.8054475026,32012.2205989455,49219.0391244972,36718.9785603633,49345.8110751925,39516.1454654067,24607.53253…
152,"PWY-5103",27157.6835192982,17548.7424730035,18725.4647831284,32816.6995033355,22600.8003599024,18514.4861354976,32518.4872419797,42580.1477147447,20165.6188969463,33538.4955349383,42439.5972822346,41743.4154631239,24873.7933858003,20440.7726704823,18020.8262415487,38568.6483035418,20255.6611294615,24824.9581156279,35774.7287141866,26764.1339125686,35952.3454935564,30637.5457699511,18949.5505…
153,"PWY-5104",14098.7429497212,8651.40270450421,9934.80267345689,19129.5539082082,12349.2986284317,10482.2037956811,22093.2561243466,27693.5930613727,12231.5425963778,21162.250135639,27372.1088739806,25398.401198633,14218.9835608207,13360.0240486498,10995.5647576602,21659.4319557481,12948.8039625225,14443.9500359214,17588.3672851918,13798.8291865502,18259.7246862794,24003.617134642,14142.3997214…
154,"PWY-5121",18603.2687444387,11835.9509653858,12330.242273321,23214.0663184306,15974.5659998517,13037.1221635413,22916.5969108186,30295.0888620992,14555.0342545329,23473.7264240018,29901.6938316692,29754.3981636472,17206.7367858243,14475.5551658494,12589.184911201,28177.5577596859,14754.4446229801,18512.2090391696,25338.4165099056,19042.7509584761,25235.169326939,21453.1463064564,13602.4316004…
155,"PWY-5154",17357.8377087475,11530.6285027431,12594.0875659286,21735.0420145241,14994.0284084005,12208.2632830005,20507.9084933043,27341.3765429724,12380.0879683834,22130.5961557768,28301.7435161484,26900.8047133545,16757.8669151795,14413.8371031252,12633.6882897991,22444.6172354448,11889.7057467155,14530.1170757141,23346.2498072617,16951.435480193,23057.7472194303,19423.7494503469,12235.68422…
156,"PWY-5177",0,0,0,0,0,31.9719639444181,0,0,0,0,0,0,0,0,0,45.9737060344676,0,23.9883327919508,22.9923956018591,0,0,102.828624241785,29.9760432321482,0,0,11.9954402812456,0,27.9899901678057,35.9793444774985,41.9688791509046,8.49926937245393,0,0,35.9745970731674,31.9773274658492,0,0,22.9878222284622,7.99833308141298,15.995764097578,0,0,61.9494825276529,127.836914078736,24.9900958126792,0,61.93181…
157,"PWY-5178",427.013618430725,323.147577618466,252.014174993248,838.648632161916,248.117643829299,226.296126671454,279.247763803912,486.509948315162,75.5287603942377,862.142543279892,935.367877725041,709.640057219592,1045.07836342939,682.570433338589,941.834838763396,1119.40257199012,322.478276152545,454.787740766791,749.907723294762,717.369617114964,753.780878553415,258.062223235703,230.698382…
158,"PWY-5180",2812.02423521296,1648.30938717484,1807.76568920042,5220.24324455349,3647.10350946751,3368.79754039559,3974.08261124963,5195.29510922537,2330.22071568026,3916.27191496982,4942.07700697607,5366.61489579968,2987.32378752348,2566.35230794344,2688.64692775193,6382.96447604293,3624.28757723811,4562.24303165954,3771.60992596861,3720.52860795588,3971.55131337114,5184.98589281258,3457.09279…
159,"PWY-5181",2818.53699904768,2033.46165485501,2091.05078042421,3597.4390653197,2306.78388689105,1928.7665395145,2939.97189515052,4096.91710491587,2240.16820199675,3851.36471312491,4494.32871652226,4044.16026748509,2805.74411647156,2320.48767574907,2099.25087180281,3465.4602983142,1635.60568363184,2195.17305799273,3861.07060063107,2863.18930530138,3847.59180234174,1905.01664137211,1127.24226004…
160,"PWY-5182",2812.02423521296,1648.30938717484,1807.76568920042,5220.24324455349,3647.10350946751,3368.79754039559,3974.08261124963,5195.29510922537,2330.22071568026,3916.27191496982,4942.07700697607,5366.61489579968,2987.32378752348,2566.35230794344,2688.64692775193,6382.96447604293,3624.28757723811,4562.24303165954,3771.60992596861,3720.52860795588,3971.55131337114,5184.98589281258,3457.09279…
161,"PWY-5183",415.424978162334,193.466872499333,0,790.438455670554,223.618158015972,0,381.065779002805,383.856815130369,86.7059145138427,928.093973841107,951.608149833726,649.583859512545,1107.23333665848,916.676383686908,1062.99190657714,794.965489847323,149.616070154665,489.06831078769,494.479328316114,972.824433495349,1008.9353445744,338.673382557345,0,189.07739613457,10.7082124835916,0,0,780…
162,"PWY-5184",0,0,0,0,0,0,0,0,0,0,0,0,0,0,0,0,0,0,0,0,0,50.8082732839587,0,0,0,0,0,0,0,0,0,0,0,0,0,0,0,19.7898023273657,0,0,0,0,0,0,21.4850431109828,0,0,0
163,"PWY-5188",21544.4861696758,13741.0095983866,14852.721911758,25725.5610555293,17639.7912412473,14471.7826249512,25728.4490905285,33644.9209653726,15696.2895963596,26680.3262167399,33607.6299449787,33502.2083108334,19502.6515889517,16076.7361052441,14157.3388403512,30941.1053451,15920.6945544754,20075.1509341865,28624.5582207541,21227.4544182219,28563.4275660399,24658.9352559415,15367.04715697…
164,"PWY-5189",20554.9661791923,13089.3181558737,14149.7496477748,24481.296726408,16717.7754032923,13838.1421695488,24402.0137760377,31835.6175133929,14938.3548068503,25186.8347258048,31576.9250675289,31707.8807717862,18644.9549089688,15252.5834062465,13611.6920106364,29185.7792370702,15150.2421770083,19243.4390032568,26922.7351898037,20103.5650671414,26941.929211774,23479.5491279264,14669.676772…
165,"PWY-5198",47.6853247787678,201.293879915673,15.9394924890937,11.9860797910483,7.99047506975763,5.9937971499915,103.041472829938,313.157319434184,55.5517370035376,184.293824448367,279.446852717645,185.536677696872,274.951622997165,154.128854662902,51.2813993239193,224.747033718996,0,256.467678832648,484.701909700404,331.671544100993,375.074758773324,434.145815735482,557.599247843683,369.22458…
166,"PWY-5265",135.767776982863,145.342736619654,73.9754701512485,0,0,0,0,0,0,0,0,0,0,0,0,388.410889072786,0,0,0,0,0,0,0,0,0,0,0,0,0,0,0,0,0,0,0,0,92.3107121487494,0,0,0,0,0,0,0,0,0,0,0
167,"PWY-5266",0,0,0,3960.62024545747,2822.87401591357,2700.13393945527,2964.20892407336,3904.45802480331,0,0,3531.75826624619,3782.2771220903,0,0,0,0,0,0,0,2679.12148315607,2588.62557577238,0,0,0,0,0,0,0,0,0,4634.8514464279,3256.87573239653,0,0,0,0,3152.85488156339,0,1910.38681789331,0,0,0,0,4493.82971488058,0,0,0,0
168,"PWY-5273",0,0,0,3960.62024545747,2822.87401591357,2700.13393945527,2964.20892407336,3904.45802480331,0,0,3531.75826624619,3782.2771220903,0,0,0,0,0,0,0,2679.12148315607,2588.62557577238,0,0,0,0,0,0,0,0,0,4634.8514464279,3256.87573239653,0,0,0,0,3152.85488156339,0,1910.38681789331,0,0,0,0,4493.82971488058,0,0,0,0
169,"PWY-5304",3213.19,2452,3742.01,5060.68,4187.01,3032.75,2575.27,3074.41,1311.45,3345.69,4630.54,4543.01,2069.5,2057.26,1522.66,7495.74,4496.49,5012.57,3219.36,2959.69,3441.05,5244.34,3766.33,5137.42,3961.08,3100.17,1748.83,5059.58,4783,3850.91,2817.41,2009.17,1416.42,2370.19,2754.18,2809.99,4493.72,3304.67,2419.08,4748.15,7504.99,4501.25,3931.08,5179.05,2949.01,4404.02,3783.83,3040.01
170,"PWY-5345",19324.7669232906,12671.0379531273,13501.9693385068,22761.5995957817,15808.787188518,13064.9833250956,21938.4896208665,29036.9267822761,13812.9492253559,23479.4991369512,29456.7319399662,28301.1682742573,18129.6228419012,14664.7972526231,13003.6363103899,24186.4885354346,12736.7128948912,16079.8809718598,24133.8414008975,18018.9431204692,24081.801049309,19571.8418262186,12291.349906…
171,"PWY-5347",16946.5725707006,10982.6978055568,12217.5433076498,19520.0753174965,13323.7065314036,11092.141838162,18746.1168114151,24295.1462430231,11872.0154658472,18445.8471863258,24271.0460146518,24362.5159904067,13670.6122892278,11586.5031498311,9826.41511339352,25232.1355256256,13397.813081508,16365.452887362,19935.0602650078,15309.1703135181,19519.5610647017,19277.5480160048,12355.6767094…
172,"PWY-5384",1305.21150945301,762.111201278389,1145.50527190642,2001.35285234575,945.531735956219,580.423717133958,1125.27211663909,2025.47340366447,857.394947589925,2247.7334457485,2599.34097202496,1914.92811821318,2935.68927888417,1959.70799665396,1708.15809141262,2754.0828290731,1120.88664690012,1914.41776612604,1955.38928502489,1745.72454028972,2192.15734600764,2233.44760200798,1857.1802041…
173,"PWY-5392",699.301217636729,975.496200995561,194.348562982039,776.797391032678,522.564121547053,530.52008799899,1692.19119291369,2996.06223828965,1265.73706622033,1187.89380652812,1527.65473078132,1111.03419318832,506.111583952265,446.943730996282,422.282808876926,2802.44838285871,1544.43069976838,1738.86839849341,1669.16055826003,541.022828381038,1819.71739705464,1445.8478779538,645.42923748…
174,"PWY-5415",2105.54926474162,1042.61360172109,1107.3616621418,4507.96109905979,3233.54205410516,3073.60371950322,3460.39962479641,4535.3434150344,2196.42967416369,2979.16999567751,4113.42442356567,4353.57003957888,2793.75106519796,2426.80252029403,2348.01189527246,5716.97379264644,3104.68149231647,3789.7765158932,2924.96118135306,3089.25088739187,3044.77826286093,4281.45031155748,2592.28321393…
175,"PWY-5417",1140.73062118739,649.726886103323,904.23237471056,1291.18161633683,970.675097483979,637.788288763715,1205.58307985618,1238.21962078743,1016.14463054205,1629.57795836288,1836.36936925457,1569.90123739532,1714.29976665964,1307.56652733111,1233.20724108857,1753.92073903339,731.571348621564,961.716204811034,1941.01215781787,1628.21680917005,1873.83741581205,1018.29960398413,653.0182911…
176,"PWY-5419",2843.91015060362,1806.87505967789,2129.69984120878,4084.46865977213,3422.77449455772,3122.52918057724,2501.55827615281,3645.0926193966,1781.52051463805,2682.05586926665,3493.17578535559,3814.33409319298,1965.85618632384,1780.62028052619,1587.83915898021,4248.55498031353,2373.41311822621,2989.73172017459,2374.35176806416,2279.35122939817,2339.32471402563,3270.02879415163,2485.594863…
177,"PWY-5420",2241.33891645697,1174.4342016007,1492.13334163223,4117.7725491865,3198.77198886707,2974.24734585617,2731.06129937133,3816.79790661071,1840.4672444717,2715.76158309603,3598.6116560961,3905.09061019136,2163.69787223129,1934.61791876953,1790.94871829619,4631.16515109141,2583.24273913329,3230.32573916767,2493.86871089681,2489.3652072446,2522.12627752643,3565.81501180686,2489.6855646485…
178,"PWY-5427",0,0,0,0,0,0,0,0,0,0,0,0,0,0,0,0,0,0,0,0,0,0,0,0,0,0,0,0,0,0,0,0,0,0,0,0,0,0,0,0,0,2.49818181818182,0,0,0,0,0,0
179,"PWY-5430",534.650733481836,391.004830803075,354.13536675089,1036.97503641653,290.038154010378,265.091300896064,348.542701680541,615.70707145119,86.0411062705805,1057.65555353785,1149.9705608255,843.68942905959,1186.17094266172,775.501884987561,1039.17652393956,1338.75036931264,380.632460712658,532.847226724361,858.857690040319,880.537476248497,869.063886123633,303.455813649149,279.9036174772…
180,"PWY-5431",1140.73062118739,649.726886103323,904.23237471056,1291.18161633683,970.675097483979,637.788288763715,1205.58307985618,1238.21962078743,1016.14463054205,1629.57795836288,1836.36936925457,1569.90123739532,1714.29976665964,1307.56652733111,1233.20724108857,1753.92073903339,731.571348621564,961.716204811034,1941.01215781787,1628.21680917005,1873.83741581205,1018.29960398413,653.0182911…
181,"PWY-5484",17930.7319958747,11600.929373596,12577.8676498683,21315.5391533722,14589.0387522425,12276.4933005207,20140.9078277843,25915.794711023,12769.9654307035,20671.4328293611,25792.1950703784,26397.3663349035,15100.866979939,11847.3908217709,10598.9660638744,29560.6717938206,15725.2895955823,19378.8521174389,21644.0394037646,17228.8439603324,21842.4924887252,21384.9002645907,14221.6334237…
182,"PWY-5499",0,0,35,77.5,77.5,33.5,0,8.87312633832977,35.75,79,77.5,115,58.5,63,45.5,13.25,0,8.25,49,0,41.5,0,0,0,1.5,0,0,0,0,0,0,0,0,0,0,0,0,0,0,53,16.5,46,0,0,0,0,0,0
183,"PWY-5505",11404.9084714744,7218.88126046964,6498.9244882258,12204.3377791241,9145.34681228131,7369.77315387402,13527.536157582,18782.5748703218,9450.24251864772,14428.6651117988,17637.0233044402,17228.603970508,10505.6052270668,8667.57990856148,7933.80819678419,14038.0592639703,7375.48204598393,8904.61463765718,16641.4320044993,12241.0009341696,15700.9021024766,13011.0330367085,7957.60040079…
184,"PWY-5507",0,286.357781378536,46.3983125877079,1885.08241562937,798.150428076596,839.454811850235,921.88572954792,617.195013281284,193.937082133839,1208.70280739116,1355.02990213072,990.703523172741,219.556879448679,414.258581802806,0,650.640915958546,70.7491944726978,582.97527642231,0,149.912785330133,398.352380003936,733.178826399149,881.717674557656,626.164392143482,953.463178810779,528.06…
185,"PWY-5509",4745.96758494292,3066.56180431118,3570.71826923385,7389.39536266726,4769.73681115117,4128.26242852246,6184.04222419853,8535.82882105333,3263.55528742995,7244.01942386591,8580.88384785873,8594.59350686829,5434.12400171151,4132.46068586489,3565.45031394283,8831.25807681575,4412.9854642764,5998.49671402554,7699.704014478,5861.38014484665,8059.12651620801,7074.06354562477,4288.50785990…
186,"PWY-5529",50.7662883476067,160.850136772872,16.7018257081464,36.8031347756011,79.49910632383,0,151.410938036102,676.252556445342,446.807062073131,216.840110132737,856.084648494606,398.834856256223,402.273361966323,302.624691036272,0,1038.84583574889,357.37458448123,624.430847253475,835.372544128966,636.468507207874,864.304517761656,501.545520977667,635.707728481366,719.376734971539,603.23527…
187,"PWY-5531",41.2778994603827,132.583379156981,13.6683263481513,20.8366403413776,146.698366035352,8.99245362410479,87.9555925384856,482.438267716853,340.629202248267,125.898722383201,602.598477993113,243.217196893727,266.327306848381,196.01609487891,0,873.695540354128,329.722714507981,545.921378704981,564.196481524308,421.721387255093,599.91317954704,824.506377518326,576.424957699044,760.293068…
188,"PWY-5532",0,0,0,67.7499910864381,0,49.9510239044191,280.971983001511,254.398459961337,123.442969050982,0,0,0,0,78.7753232481201,0,0,0,0,0,0,0,177.818093506809,138.759565582333,127.14440598323,338.9210149191,193.72089014376,168.327989342643,0,0,0,28.8140393044336,0,0,85.2146856511911,0,60.7590060143295,0,0,0,0,0,0,0,0,0,0,29.5094707861695,0
189,"PWY-5647",1751.58377975241,1061.47147898624,1137.99711110666,2735.00287734497,1981.73328670033,1941.21331970872,1434.20013946377,2021.9819599664,1098.51865158166,1488.65233381869,1895.5505650704,2049.63211782166,1237.2880579569,1175.04691628853,864.367706814724,2321.60157977462,1224.8724188266,1627.69631608401,1255.626108629,1100.15200496236,1325.30822134005,1864.21261849386,1499.91939452627…
190,"PWY-5651",2571.82925676976,1651.53092090049,1902.53026085784,3801.95291409276,2520.33739306893,2459.0323941615,2090.79919965959,2995.36764947573,1647.51137416811,2233.70725773644,2835.12049592223,2992.42861840739,1964.2336064303,1843.30112354458,1317.63928945926,3532.00011476964,1777.5418690738,2384.70197019554,2100.46416370312,1531.12879527293,2146.65813523859,2835.60007147768,2127.50195091…
191,"PWY-5654",1754.45303428181,1068.99698347614,1148.31920744769,2794.05803765678,2086.34281443668,1975.30925866959,1647.73996576018,2251.39844636247,1133.77315120657,1659.6945370586,2055.39234196075,2291.93284041678,1237.77854271086,1169.48592355671,891.410135062573,2451.54835141769,1295.42985412517,1726.43272422582,1299.98072907867,1435.83098752511,1470.47769402372,1975.98721762858,1661.468486…
192,"PWY-5655",2050.81932537467,1163.7985366833,1381.03769059223,3319.03452814943,2312.82683343633,2246.95675730856,1881.77676841207,2699.89861286885,1475.29579872449,2007.69963203663,2597.67557033323,2799.45443896373,1715.844549882,1584.50429681147,1154.11141136653,3046.6423078032,1504.6012580121,2110.61874755294,1782.4923366248,1473.86399363584,1906.7824754579,2539.51115136354,1966.72731935882,…
193,"PWY-5656",0,50.1509454831072,0,101.393538051423,128.271416458833,0,105.427239798078,91.9204106190782,0,40.9863688943951,167.928885070108,40.3220042197914,38.529565949332,42.7046217371968,0,117.975637464851,0,160.874773063976,0,0,64.7458254732357,115.934865803887,0,0,64.6675104007364,0,32.2990815660712,100.686592763301,0,157.099624086224,770.227370801925,347.497262965317,158.838333878803,477.…
194,"PWY-5659",22654.7418076436,14815.1694359809,15667.8927931649,28049.878011054,19297.8668328097,15941.1060789428,27599.9811904275,36225.0561401528,17316.809501928,27947.4375978365,35659.4374167415,35295.7758850958,20723.0223697382,16826.8728599965,14836.3550950418,35292.062365765,17891.6566546509,22362.8323460278,29871.7832332072,22319.4132211361,30390.2622570797,26352.1831496239,16700.1680610…
195,"PWY-5667",24994.8254070191,16052.0271761133,17262.4281251993,30967.4857950823,20799.4531896869,17199.7130164629,30644.5847215514,40457.3031425826,18853.5840812492,30965.6183333907,39358.3876447879,38994.3301261356,23709.9642294909,18998.0746967191,16946.3266136925,36364.0463125091,18853.7222429635,23515.2154278692,32802.5659754198,24447.0514853469,32813.0047639829,29388.1472193537,18617.6415…
196,"PWY-5676",3268.57310472511,2472.83040880092,3089.52407228982,7688.87959288811,5532.75323245668,5018.89828896182,4601.09822946287,5396.71323486298,2304.61367182155,5017.79169608828,5634.19059025281,4848.63372884632,2696.18759194149,2567.42168059222,1982.22825312705,4930.19850232017,2855.70086134511,3763.4973628594,4428.65153309252,3754.92489282286,4705.29174340154,6065.8309054863,3608.2368347…
197,"PWY-5677",0,0,0,109.103536438742,49.2742923148203,14.4584718489813,87.6476066644918,92.7928038339186,0,0,0.539641445512714,0,0,0,0,322.694999294929,53.6977915464115,305.93656141751,0,20.3566948157301,32.3789554168427,159.866199770276,120.787272425334,126.230553391221,127.50711762804,0,0,145.491799505524,49.2425379615401,85.5729382005458,68.7721492016028,58.0561204746899,0,0,0,0,89.9053064168…
198,"PWY-5686",23407.7370534147,15013.7675401392,16108.0282445504,27979.8662319258,18971.5286022836,15698.4768063045,28186.0899244279,36833.1827865482,17205.2764349729,28807.1324086109,36453.0049214523,35952.3673932508,21149.7656587833,17195.3462670499,15229.2350952842,33278.4162884143,17370.3220039109,21660.3112469966,30630.0753448851,22765.3782427711,30717.5489222999,27036.7100928447,17029.6097…
199,"PWY-5695",19840.9415263641,12675.5554677314,13916.5760040159,27718.26544222,18843.2342885345,15709.9764782303,25117.199147932,32033.720314849,16007.5160930083,25185.3868005035,32269.2017339362,31392.5370574009,20391.6751013917,15743.6783343229,14320.9864996646,34397.4699355608,17720.6692046272,22253.6036794454,26915.334030502,20154.4099024148,26731.6099719478,26640.189414712,16289.2054909499…
200,"PWY-5705",1471.37191420251,1079.91379943985,1243.57524170146,2269.76277275762,1634.34395256599,1261.50969658088,1633.89380483556,2311.36572021668,1161.71748246778,2073.90714647066,2609.98740272051,2557.99204106635,1908.55454957328,1408.49337244255,1356.13546388786,3587.19350150123,1928.34239911386,2265.93749395026,2081.75807068748,1665.60971825852,2346.8339960176,2198.10789294364,1414.098513…
201,"PWY-5737",0,0,0,0,0,0,0,0,0,0,0,0,12.887388109699,20.8714446589791,0,0,0,0,0,0,0,0,0,0,0,0,0,0,0,0,0,0,0,0,0,0,0,0,0,0,0,0,0,0,0,0,0,0
202,"PWY-5741",2994.3332427763,2249.03882878365,2081.32714490217,3906.72899614667,2692.03475109189,2186.27317693944,3449.3421016479,4739.05799495391,1998.24619896146,3477.19552270479,4521.09851206609,4034.20330568575,1930.96057032978,1618.9925986386,1621.68664810775,3098.15134083298,1984.15404986899,1627.21769556065,3579.23600423112,2956.99458313387,3887.31069769005,2032.91653039936,1029.12573299…
203,"PWY-5743",0,0,0,0,0,0,0,0,96.3682133912307,0,0,0,0,0,0,24.4630686629947,58.5344916166045,21.5731526135897,0,0,91.8480116975713,0,0,0,0,0,0,0,166.030710156904,107.916399053109,0,0,0,0,0,0,0,0,0,0,0,0,0,0,0,75.2563050948104,0,0
204,"PWY-5744",0,0,0,0,0,0,0,0,107.697527198315,0,0,0,0,0,0,24.4461104858762,59.4188127514951,21.5792953543568,0,0,96.3951754440099,0,0,0,0,0,0,0,166.659589439835,111.815759620683,0,0,0,0,0,0,0,0,0,0,0,0,0,0,0,73.3352434100518,0,0
205,"PWY-5747",3899.25001269606,2485.81027806123,2554.18855907086,3517.57410098296,2074.40310496338,1884.96410812799,3161.61125125233,4132.47408028923,2131.15419657231,3501.21166398163,4291.43473424306,4118.16583771311,3216.41943863327,2284.0485243029,2066.50803896805,4778.66040961278,2194.47402574575,2823.12528744404,3568.89979103248,2472.80300436714,3793.14718772329,3469.80762374224,2264.097911…
206,"PWY-5837",3337.44913136512,2474.63054273718,2532.43533412956,4371.98793929346,2714.51829802066,2810.52109106769,4934.73420183322,6647.75544427496,2950.05093543125,4885.63565173522,5277.43301549547,5047.60769805221,2560.97388798368,2026.4263394018,1476.65039795745,7782.83961149778,3990.88595324522,5001.80249493048,5196.88733714869,3766.88021689939,4965.99459755121,4669.0551261282,2853.1516076…
207,"PWY-5838",6298.39400616647,4399.32880758288,4557.60034609198,8272.90026680082,5358.95511927207,5125.0477368205,8902.63858430604,11960.4822446624,5557.22624321329,8655.98390380225,10054.0690429246,9887.72285925421,5047.62015293155,3999.68848424973,3110.94720853044,13696.798769556,7197.99207757903,8864.28068741549,9405.96674564287,6951.19536811565,9274.5194850092,8646.57963136518,5370.92068733…
208,"PWY-5840",6169.49308307065,4299.24418322035,4468.29855309784,8082.52658563455,5251.41781436719,5027.99215456786,8607.6806593121,11505.8750850739,5361.05837549278,8344.95724360511,9703.82860327878,9632.60386141946,4802.01997511623,3810.58872485939,2957.54783698118,13560.0448733736,7121.51910132794,8757.88329656781,9151.6497607152,6804.14743427187,9053.36952926462,8486.22280424487,5263.9758005…
209,"PWY-5845",5340.92380122755,3598.08156253401,3721.82004880764,5859.46291435332,4113.11862925455,3593.68691258858,5484.16003462773,8654.89600420053,3969.40310556576,5588.7323277375,7816.04551725924,6467.57416053763,3756.52342428915,3013.69379360625,2337.88311088725,10111.2676768877,5384.43732508283,6896.39294057185,5782.39528560657,3589.49481324627,4883.07856429046,5834.33181244587,4158.622800…
210,"PWY-5850",5340.92380122755,3598.08156253401,3721.82004880764,5859.46291435332,4113.11862925455,3593.68691258858,5484.16003462773,8654.89600420053,3969.40310556576,5588.7323277375,7816.04551725924,6467.57416053763,3756.52342428915,3013.69379360625,2337.88311088725,10111.2676768877,5384.43732508283,6896.39294057185,5782.39528560657,3589.49481324627,4883.07856429046,5834.33181244587,4158.622800…
211,"PWY-5855",12113.2149667309,7710.29003614602,8099.70895158698,13225.8222720575,8539.11722805793,7106.21470448676,12013.9171770657,16424.9475900331,7879.00433634054,13757.0820178318,17335.8668151913,16449.8367303527,11091.4451857263,8289.34990631562,7402.2190747416,13334.1901102903,6211.00659660524,8496.7816832494,13811.1292221257,10088.9315345959,14007.3106808901,11083.1797063666,6936.1905219…
212,"PWY-5856",12113.2149667309,7710.29003614602,8099.70895158698,13225.8222720575,8539.11722805793,7106.21470448676,12013.9171770657,16424.9475900331,7879.00433634054,13757.0820178318,17335.8668151913,16449.8367303527,11091.4451857263,8289.34990631562,7402.2190747416,13334.1901102903,6211.00659660524,8496.7816832494,13811.1292221257,10088.9315345959,14007.3106808901,11083.1797063666,6936.1905219…
213,"PWY-5857",12113.2149667309,7710.29003614602,8099.70895158698,13225.8222720575,8539.11722805793,7106.21470448676,12013.9171770657,16424.9475900331,7879.00433634054,13757.0820178318,17335.8668151913,16449.8367303527,11091.4451857263,8289.34990631562,7402.2190747416,13334.1901102903,6211.00659660524,8496.7816832494,13811.1292221257,10088.9315345959,14007.3106808901,11083.1797063666,6936.1905219…
214,"PWY-5860",3898.50189861886,2633.54785912896,2717.61117065051,4239.00681604072,2986.35910125661,2622.52481009219,3941.65980034831,6324.86495252376,2890.6102697176,4021.62963265752,5667.70017013953,4627.08177721137,2683.66848378729,2153.83410965999,1653.4513394277,7629.1034568668,4076.03707523468,5238.04316350142,4149.62576119182,2542.92684350961,3461.24259745066,4242.91547846375,3065.84912923…
215,"PWY-5861",4676.95243752311,3291.76733507237,3400.64141807523,6202.5871932581,3998.80931074558,3897.21485242641,6726.09801539349,9073.84710908816,4202.10497224502,6512.58907269646,7478.37832861451,7358.56813320486,3697.01298370451,2927.49091610956,2245.38597511204,10841.0143959434,5709.48504668967,7011.42058460709,7089.64640816455,5231.44520720941,6970.40107224207,6576.04237940474,4085.646553…
216,"PWY-5862",3898.50189861886,2633.54785912896,2717.61117065051,4239.00681604072,2986.35910125661,2622.52481009219,3941.65980034831,6324.86495252376,2890.6102697176,4021.62963265752,5667.70017013953,4627.08177721137,2683.66848378729,2153.83410965999,1653.4513394277,7629.1034568668,4076.03707523468,5238.04316350142,4149.62576119182,2542.92684350961,3461.24259745066,4242.91547846375,3065.84912923…
217,"PWY-5863",3698.77172537896,2727.19237560331,2789.91141427569,4855.30022018905,3023.31822124628,3108.11672831806,5449.28299146973,7333.13522617857,3267.860632557,5397.65426035372,5864.11063421379,5619.13629388916,2856.35600331542,2266.20297951182,1656.1160595006,8566.95672484617,4398.69181380142,5510.59292909624,5750.53687247899,4173.06643592034,5499.07079575199,5158.2676408976,3161.418671000…
218,"PWY-5896",5340.92380122755,3598.08156253401,3721.82004880764,5859.46291435332,4113.11862925455,3593.68691258858,5484.16003462773,8654.89600420053,3969.40310556576,5588.7323277375,7816.04551725924,6467.57416053763,3756.52342428915,3013.69379360625,2337.88311088725,10111.2676768877,5384.43732508283,6896.39294057185,5782.39528560657,3589.49481324627,4883.07856429046,5834.33181244587,4158.622800…
219,"PWY-5897",5938.56454684845,4171.06027211063,4316.34791026828,7807.66739220763,5037.59461393929,4863.12147872362,8440.36167496004,11340.0421168737,5252.37912999944,8208.16333409978,9469.30069353264,9300.58984311704,4726.26370236213,3743.29604609971,2891.79422496204,13135.9826705002,6893.05499300052,8495.8479536384,8918.39434495038,6584.67750477253,8770.56533818449,8190.24467427484,5079.737963…
220,"PWY-5898",5938.56454684845,4171.06027211063,4316.34791026828,7807.66739220763,5037.59461393929,4863.12147872362,8440.36167496004,11340.0421168737,5252.37912999944,8208.16333409978,9469.30069353264,9300.58984311704,4726.26370236213,3743.29604609971,2891.79422496204,13135.9826705002,6893.05499300052,8495.8479536384,8918.39434495038,6584.67750477253,8770.56533818449,8190.24467427484,5079.737963…
221,"PWY-5899",5938.56454684845,4171.06027211063,4316.34791026828,7807.66739220763,5037.59461393929,4863.12147872362,8440.36167496004,11340.0421168737,5252.37912999944,8208.16333409978,9469.30069353264,9300.58984311704,4726.26370236213,3743.29604609971,2891.79422496204,13135.9826705002,6893.05499300052,8495.8479536384,8918.39434495038,6584.67750477253,8770.56533818449,8190.24467427484,5079.737963…
222,"PWY-5910",1185.61250897784,967.699673120046,1128.2925680301,716.092421798161,682.673588204133,414.898746509821,648.228070214306,601.851649871333,414.139473462281,508.253404425956,620.462560243945,435.545246083376,484.199617589031,189.268436066752,11.5558521386872,499.787767697077,86.9511920519427,68.846339523289,784.193400257941,768.662544284294,660.305354799607,407.799921269561,220.86369862…
223,"PWY-5913",17859.4535123853,11478.9469237396,12478.4716262449,21773.0246063567,14889.8579479019,12216.4690713049,20361.105798949,26475.7980996612,12864.2955000399,20767.9046862865,26063.0268787799,25946.2950989562,16008.5686060782,12741.8183373245,11494.7018506833,23586.5535248459,11714.6316922986,15380.4423478257,22254.1599429957,16733.3533024695,22257.8463673914,18069.7400743155,11782.11664…
224,"PWY-5918",13922.5220192711,9273.65299901887,10368.560645539,17180.9386323054,11624.7884030212,9696.2090427224,16680.5676427679,21954.9130972714,10451.108989454,17272.818230377,21927.9132413767,22430.9783185973,13492.45440983,10435.1787007083,9421.85718594907,22988.385479304,12285.9114627649,15318.519634088,17881.2199967098,13660.4799713745,17887.9789585078,17761.6819528697,11407.3846592003,1…
225,"PWY-5920",11086.8613331948,7266.38577717634,7938.43102365729,13850.4398657532,9292.34122651371,7833.19163719712,13271.1496037704,16705.0861244405,8186.69592044148,13385.804348215,17420.012524338,16843.0659882901,9965.61819144173,8234.00487314801,7005.35912641546,16651.2111090271,8451.86582365142,10795.7094569306,13777.9416631802,10167.2007311849,13851.9378252986,12729.5090140678,8251.8309408…
226,"PWY-5941",4009.84795195068,2899.64577420646,4057.12076568904,3458.88276598529,2298.11830346871,829.889937306957,3670.52002123443,3986.64730991253,2219.26625848234,5694.69195274198,7736.02760103385,7254.52858206033,4170.58017390607,4299.408932154,3714.85573904281,1548.28199380705,948.925951381164,754.755789790478,5803.63094179484,4449.46287017679,5833.49110348547,841.067607573122,154.17230251…
227,"PWY-5971",14881.9036705319,9735.62210639543,10416.3519954128,17853.94781949,11873.9794790225,10136.5445932792,16741.7664941247,20890.5089822156,11870.5856505222,17528.5727075712,23456.496880136,21386.4653224321,16526.8800475523,13577.4204296784,11968.124803472,16456.7062653958,7535.0850444273,9213.1236082746,17140.4047360859,13228.920914808,17454.6807461127,9473.62560889932,6885.58570675102,…
228,"PWY-5973",28439.0298421918,19028.6393237341,20391.4783071465,36542.9764360741,25554.6981432892,20774.7055178769,35328.1783858808,46123.5398794728,22372.2121156309,36114.3070248879,45939.9693440022,43427.4724283848,28357.4330719483,22849.9321059045,20939.4569127715,34546.6596840845,17608.9512552616,22243.4761171743,36435.6286186562,27561.6352230677,35961.3539280726,29677.9384694805,18950.1624…
229,"PWY-5989",14054.9799226665,9273.04408288178,10052.4972867281,19920.5106638178,13213.3883986188,11294.8706602824,16160.0527029015,22125.9969422824,11597.9158276082,15658.1894468618,21200.8113336677,18800.6979137767,16971.0220916889,13558.3973598944,11586.8840692008,15192.450630462,6372.21066155578,7994.0876223925,14409.7684807066,11181.8336929486,14973.516290948,11173.1577313735,7224.77363284…
230,"PWY-6071",2692.53669802752,1786.42324230811,1813.85864992876,3291.2646038951,2094.44882641342,1816.02683191688,2918.89148957489,3514.14140596179,2281.67939050361,3129.46137636628,3958.50857474464,3897.02150141682,2616.89329175429,1955.21421423209,1987.98105042446,4173.11533911923,1971.87597571188,2745.40220948073,3281.48821359512,2505.14366633996,3207.45067651309,2194.66767366911,1337.613281…
231,"PWY-6107",1352.05161903655,1124.1002331911,1248.19368629442,1694.06917113181,1542.27159090909,1182.85411801339,1475.67149541093,1626.55490594543,1007.24498791487,1468.92580223906,1769.81805308275,1485.04359547347,1173.01138759689,1179.1554563065,1085.15545023697,619.9058280856,172.751389352232,389.157486170679,1482.43751956374,1200.67762096006,1501.12034826844,633.58363384401,396.97706255635…
232,"PWY-6121",22970.1785016683,14571.6759099155,15727.6048773361,26937.1604597119,18288.2277561648,15230.4708519059,27288.0792076393,35601.6443179402,16848.8916880965,28042.9229579897,35243.3213634845,35032.9996900482,20935.0160523861,16943.9018468125,15110.2207732646,32388.7959958427,16718.9146674904,21333.147068406,29888.3008052797,22276.0779953415,29943.3335107586,26425.6216305803,16419.00678…
233,"PWY-6122",22954.8246139278,14579.5787597242,15785.9641205784,26986.976998037,18402.0285560794,15267.4009327524,27601.920081217,36028.0058255396,16904.7762841941,28337.3322332138,35608.6815052176,35431.8570380033,20950.9907824323,17040.1134623927,15174.189446539,32506.5316858728,16902.3672594393,21419.1246617151,30197.2959109115,22494.624272931,30215.6894336805,26508.1148504851,16514.62915717…
234,"PWY-6123",19797.2265984988,12604.0343704514,13612.7722672747,23501.1927083064,16014.1066873768,13283.1498660734,23826.1591955356,30961.3778673166,14589.3490406013,24273.598212327,30687.8301594004,30472.0613855448,18002.4136872539,14545.9117385648,12936.5258252922,27882.9040718918,14467.496795531,18225.46565575,25859.113408758,19223.3262890447,25940.8279213378,22663.150203379,14205.7210796974…
235,"PWY-6125",22366.3779065879,14326.7432083758,15347.0179137645,26621.2657764566,18123.4753699313,15019.4802999951,26574.5280014736,34687.7531292042,16564.4009846383,26977.342244873,34212.3511999655,34171.9655787231,19998.8140392037,16128.8621697312,14366.6261280971,32745.8040408837,17002.0629872452,21087.2164106692,28796.655724244,21543.3373738475,29029.3200323405,25638.66805467,16030.71736085…
236,"PWY-6126",23690.9662606185,15136.0974346767,16240.8069473234,28469.5343883949,19270.8754135834,16027.8691717602,28523.373694012,37424.3510408502,17643.8513774536,29030.44799904,36746.8162141791,36416.5260326541,21567.3664261919,17492.5313550688,15492.5625385719,34007.7192936929,17553.2092795669,21958.0193890134,30892.2418486826,23017.5086953037,31109.6770037687,27334.0101951249,17276.9784793…
237,"PWY-6147",17803.5636181937,11466.2054017176,11925.4432142719,21432.9505625994,14489.9625658946,12330.5347036277,20974.1282683754,27656.0368951746,13391.5275266246,20629.5457996476,25600.9872774408,25562.0469477973,16338.8189330091,12577.6860642342,11578.1869110119,25077.8511694336,12831.8940300491,16193.7708005351,22101.5649891365,16880.9008569322,22139.7122374087,19028.6038755315,12041.1056…
238,"PWY-6148",0,0,0,0,0,0,0,0,0,0,0,0,0,0,0,0,0,0,0,0,0,0,0,0,0,7.15278937538805,0,0,0,0,45.8341820176884,0,0,0,0,0,0,0,0,0,0,0,0,0,0,0,0,0
239,"PWY-6151",9668.32052767646,6618.51349617842,7448.1773956883,11668.9502794408,8567.29771252934,6996.20406629948,9359.27595323562,12672.6922179021,5967.5359898057,12358.6356432574,15257.7772581925,14451.9832914554,9488.85703765894,8100.5760166626,7074.53377217467,10354.6322212347,5627.71708447093,7035.53681745435,12567.9657860058,9933.58148433239,12200.3558020351,9339.25495871037,5870.81843891…
240,"PWY-6163",20394.3394156419,13157.7827930563,13981.4085634296,24688.653067974,16721.8667053539,13950.7770280908,24803.3319134453,32156.9432467341,15153.8716893896,24788.040660408,31684.0154492573,31484.1807233632,18935.8657308472,15382.6397064119,13536.3129141652,29835.6955128759,15581.8710230272,19395.1335643078,26485.1349352282,19880.1092529194,26630.3297336053,23699.3230157779,15065.154339…
241,"PWY-6165",0,0,0,0,0,0,0,0,0,0,0,0,0,0,0,0,0,0,0,0,0,0,0,0,0,0,0,0,0,0,73.6142781972924,0,0,0,0,0,0,0,0,0,0,0,0,0,0,0,0,0
242,"PWY-6167",0,86.2537261804923,0,123.179927233274,0,30.7220435212494,243.771447432049,297.746481878179,0,109.031618517513,178.496865171981,0,55.2949031410213,135.627747498809,94.043462637864,202.310886839401,0,286.833724446314,0,0,109.675376131212,0,67.4750821992399,0,318.686822023642,0,291.452630164847,172.521258800272,0,277.236685143388,1245.19354522027,482.455744034408,239.625855238605,1033…
243,"PWY-6174",0,0,0,94.71783545397,37.4247687628381,0,373.806604549152,300.553224414151,140.978917755656,15.8995268625372,218.175069581701,223.329836871684,29.0882920345661,108.198131431549,0,199.991500451082,24.3099766852553,48.1236410297321,16.012671573543,0,0,275.424508246119,64.7418497398756,235.180977947385,449.365308890655,391.45283003013,275.621668075132,393.287011307627,303.957255533466,…
244,"PWY-6182",1280.5116940019,737.774682060348,1018.61320809323,1463.20143540667,1099.34416212743,726.471709888083,1363.08201111876,1403.99655825207,1141.42848046151,1819.92639913625,2059.8650884369,1764.40467739968,1891.93375776834,1450.45693518846,1373.87200177254,1933.71198638571,812.218753295763,1061.43158858971,2144.50201473928,1796.03705526573,2075.19665914,1135.83617355018,732.90976458796…
245,"PWY-6185",714.693199344646,330.350921893629,229.563686851291,850.042585351464,232.672440409953,64.0155664081678,1052.50727142734,825.97738831821,1005.74230470038,947.100587885949,1351.62303946124,1378.57379169309,1453.93504658194,1121.58087719028,1109.16865496369,1890.72693151098,955.7818120452,1241.07317185327,1428.34370929599,1267.11240533396,1282.07028576946,470.740618126882,610.962343246…
246,"PWY-621",4005.71930892658,2899.98684746589,3321.24676911664,4206.70389255687,3210.39129163096,2721.02339076093,3823.81353018794,2881.55577287366,2351.5093646261,3641.47698169402,3714.08369808027,4117.58682544274,3090.18328745401,1959.70799665396,2130.44650946634,9599.06989860035,4891.29995986421,6016.65079345752,2816.43425396611,2587.35459542445,3257.84373296357,5866.74383275705,4054.9181461…
247,"PWY-6210",1174.84653954485,666.194334339263,990.965746400768,1967.43898339943,1335.0053785994,1342.39824733365,958.343512442275,1578.54280854773,918.337801316228,1170.29681153727,1499.72833450519,1670.08751968904,907.046207089882,910.571615467011,506.508362856948,1519.90084188829,703.752359732294,922.004178409115,1042.47268975143,861.369376213257,1123.63912795035,947.931039003924,930.1939214…
248,"PWY-622",0,0,0,0,0,0,0,0,0,0,35.8093032600052,0,0,0,0,0,0,0,0,0,0,0,35.7145826929629,23.880774085735,0,0,23.3825992024589,0,0,0,0,17.9359157597553,0,0,0,0,0,0,0,0,0,0,0,0,0,0,0,0
249,"PWY-6263",10975.737728859,7204.84775850375,7741.86418297566,12217.035479891,8729.87942031649,6852.97701126563,12261.1848133277,16046.4838545507,7091.95815080622,12693.3362276411,16086.637041658,16538.8292890777,8304.95467773238,6946.88511437768,5738.61624267896,13727.406059314,7215.21763060806,9653.26983294075,14368.9697295413,11100.9626541772,14575.6488418098,12931.5621768688,8105.522638781…
250,"PWY-6269",4745.32935854103,3063.37741649287,3572.20466675593,7388.61288275878,4763.42206024995,4127.9052337504,6189.95470417864,8548.77619969476,3256.44274375119,7259.51041258624,8606.82922876824,8599.62152836943,5450.10263492314,4140.32008612302,3571.80026633349,8847.13813308838,4426.75580317083,6023.90223506722,7721.53611423627,5869.33271634387,8080.55074358346,7095.7928924323,4308.5531960…
251,"PWY-6277",22954.8246139278,14579.5787597242,15785.9641205784,26986.976998037,18402.0285560794,15267.4009327524,27601.920081217,36028.0058255396,16904.7762841941,28337.3322332138,35608.6815052176,35431.8570380033,20950.9907824323,17040.1134623927,15174.189446539,32506.5316858728,16902.3672594393,21419.1246617151,30197.2959109115,22494.624272931,30215.6894336805,26508.1148504851,16514.62915717…
252,"PWY-6282",13762.4039802386,9092.22966238341,9828.40828535174,19376.4852677906,12865.7989248805,10984.8451398386,15785.2489797337,21593.1574052252,11307.8856204749,15327.9143027427,20707.6510701502,18352.5229562729,16629.7534149393,13246.836347627,11387.4689821233,14667.1338142107,6187.40918144053,7772.73887251044,14093.7359803091,10929.5977236475,14621.9644041584,10918.3489487318,7058.898922…
253,"PWY-6317",13013.4740053905,7928.32960617179,9158.74029532256,16259.1606205805,11251.8658433958,9319.51922381335,15378.698635755,19917.7924277088,9291.97729328911,16615.2901964911,21247.4440149579,20971.5637112267,11280.3385527213,9888.81554543694,8169.40063978136,22457.4094266845,11891.1409791477,14771.2807566088,18260.097107797,13649.9241721128,18360.056842618,17097.4061119083,11004.4933619…
254,"PWY-6338",62.8943551041155,0,0,337.559748987984,173.974243397127,0,345.229273763817,492.854962445048,135.16929483899,176.651250672474,655.519991479005,480.816744427149,761.585938122987,211.85251287979,302.730361342218,990.323619510478,323.197474824336,349.279959927487,266.073786691048,385.976089561629,321.662697484253,508.202184728513,452.735806347269,633.845598411025,236.302715315884,116.51…
255,"PWY-6339",0,0,0,1070.74491675582,583.824935457837,0,712.766660781008,887.957092859706,402.15324834587,486.604251535549,1042.02187087834,1075.23043642091,1476.87415147019,686.281636790773,731.757990811316,2119.12947418028,986.38632086192,1082.65617214543,514.135846014049,629.657942882921,573.252229244767,891.046333770839,0,0,0,0,0,0,0,0,1013.07920884275,844.236572335103,494.089567789512,0,427…
256,"PWY-6349",0,42.5326225849218,0,56.4532008766885,0,38.7680656523093,182.41320003904,206.788151752743,71.3753246752641,7.21030867200497,83.0356147920851,0,0,49.5703581213573,0,154.544767185687,0,172.233443508242,0,0,51.8015804371411,120.926042210551,97.3315963547844,78.2951360463544,252.135197741287,117.631117633176,184.586974738887,99.3540337865519,0,129.501578681273,323.11121264149,187.63840…
257,"PWY-6350",0,37.7338563829731,0,43.7317488776264,0,32.6418262681838,157.568855191176,173.747271765361,63.4767087185081,8.60471070691312,73.7681342690495,0,0,49.4552267327426,0,124.47663071703,0,148.145474759161,0,0,46.5026511295499,103.172163001411,85.7074245390042,68.2026223183245,236.965626599852,109.570994350643,179.579376179154,84.0465585118791,0,116.843133379309,324.207876557111,174.3950…
258,"PWY-6353",14592.5625942406,9587.55749146713,10819.4719424069,20168.7258792613,13718.053166135,11168.9980851103,17712.7609043065,23210.277618905,11317.2035031163,18647.5278821078,24394.9377699988,24005.5425037434,13677.7617263071,11365.2071048148,9960.8648696432,28025.4805486201,14606.6278514164,18035.4503654574,19631.4903824691,14620.8166088119,19456.0276955605,19507.8108211932,12770.4336703…
259,"PWY-6383",3723.32066315264,2348.12992404017,2491.07504549307,4961.47755141986,3607.14161585703,2950.42652752958,3790.9468981471,4862.54773308997,2889.12367431854,3880.37652455511,5103.39712610573,6193.92818243989,3196.47559529831,2478.4722305242,2183.62267787103,9194.24230562533,4964.49941842433,6050.52543204969,4579.03224673747,3958.75149017543,4770.48029765336,4009.05225070955,2460.2056545…
260,"PWY-6385",18665.1958363492,12068.865408137,13041.1300433007,22579.0998488192,15416.2748685401,12826.3736267952,22423.4676824939,29040.6778802715,13743.8279597716,22530.1509867113,28705.464578079,28900.1147213637,16645.8742034812,13231.7656262053,11719.8444480081,28257.912244822,14838.865663464,18420.0605587643,24262.3906294685,17955.2708115527,24400.7068720753,22253.4649910502,13942.79056291…
261,"PWY-6386",18326.4328980522,11875.3498182759,12876.8222421812,22274.9138817545,15171.5844310352,12641.5615141252,22032.385152904,28470.7915004104,13472.220480945,22094.7067858022,28210.1577275076,28423.2711215651,16258.6514937649,12850.6297088473,11365.0912425446,28247.6354062223,14850.7540597295,18435.4330053895,23760.7358937667,17541.3130074974,23922.2661449134,22181.6972586709,13901.727290…
262,"PWY-6387",18971.8905356337,12289.6687084746,13245.0681733906,23329.5189745609,15670.5862278598,13128.3066439969,23143.9893483579,29934.1626771882,14050.5613820711,23147.314005454,29463.6606256857,29575.8687647591,16998.2296776232,13419.6822582151,11934.3283120252,29303.8451097388,15283.6667911142,18962.7111247556,24732.3742539443,18161.4037416861,24785.1584308232,23047.5984493325,14398.34802…
263,"PWY-6396",985.695709267799,557.900583679854,563.8649900728,1409.8386407958,872.658845442668,917.915953212503,1775.5262955303,2040.38368070344,998.922118205996,1783.71963281598,1987.01741933166,1903.78853356966,1541.5369724513,1015.9033374455,1234.47058500825,3429.07681300349,1187.04384175917,1967.94815472212,1714.03661777869,1515.3807126889,1574.48960846321,1595.12388610271,1108.35579887666,…
264,"PWY-6397",456.114115908089,279.431968786099,94.1920044486944,650.773876109663,456.956447655622,423.86483936989,599.981754715598,599.092430040582,397.748374251221,616.384826592073,887.572041234068,1046.65686415358,431.982593416439,477.393143195534,419.944818220418,436.845332940062,0,390.194227320975,812.389422460932,574.620317368577,603.702269943824,404.00008999363,51.2105147413076,372.041901…
265,"PWY-6404",1574.99096625446,967.443160048277,339.128762890887,2226.90411805187,1561.33775099355,1434.99417857734,2049.51466030361,2083.38928189595,1350.56426123798,2072.99921553038,2942.19883943114,3434.6526241073,1492.64761008688,1584.52250850475,1367.60291167851,1424.51444785703,0,1316.50932053907,2739.95330156839,1947.85787242748,2044.18647048668,1398.48184621894,0,1285.89164465716,708.787…
266,"PWY-6467",12802.11,8321.73,8899.16,15450.57,10321.15,8237.66,15614.27,20720.49,9495.56,16068.5,20132.75,18901.67,13157.68,10954.18,9865.08,13816.26,7402.93,9651.14,15657.65,11489.46,15160.39,14322.57,9346,12835.98,8791.5,7954.92,3238.83,15448.32,13035.96,12295.42,20786.24,13457,6545.83,11706.54,11058.52,12935,10164.99,8388.25,7445.74,14591.84,16253.05,10373.13,11868.17,14841.58,8797.49,6994.…
267,"PWY-6470",789.85005090886,274.718059375968,559.948544565871,9.56187642442151,0,369.936591199604,0,0,0,0,0,0,0,0,0,3164.14299867136,2313.86795643817,2466.87041926225,0,0,0,776.649165266063,617.394773019967,720.84314754945,1104.96322116806,544.549036442947,0,673.471606513661,322.28268736292,365.484077276421,0,0,0,0,0,15.5079622582292,1275.98678982782,0,0,114.676810235963,0,0,1367.76913278223,1…
268,"PWY-6471",2019.80115452451,1548.95974724374,1272.66766937773,9.59587232699002,0,427.019558677515,0,0,0,0,0,0,0,0,0,4257.72456427068,3185.73908992661,4320.9529792045,0,0,0,1457.69550868424,772.802826722076,1046.21782235888,1585.76182763438,1643.25502633672,1018.38239053552,862.356049345212,367.857106215713,913.585112590544,0,0,0,0,0,64.5648796331277,1992.3458591674,0,0,124.061162477013,0,0,17…
269,"PWY-6478",5584.55313639483,4169.9992391034,4192.94286272134,7995.64508449565,5262.98319474617,4255.61846364512,8831.76186252135,12003.9435736588,4333.3624043078,8383.24920858791,11341.5594902228,10836.4821525792,5929.6211818534,5688.79490052567,4431.4884595409,9996.96464338348,5545.87798403494,7301.72767009652,9210.7312192205,6143.11983955455,8668.79024548025,10392.7564809125,6794.1885002708…
270,"PWY-6505",1775.56876805475,1020.37916283344,1228.2714401634,3069.92912271598,2099.07097884582,2036.05936938934,1709.82912602452,2587.26543550742,1425.25986847817,1907.1451004588,2464.04772703634,2675.41410110242,1521.19961150351,1471.23535861621,962.802148524835,2988.95627624212,1722.15843666678,2225.4590478963,1764.41827274564,1466.89148605864,1842.69907806339,2603.36373680691,1824.77149150…
271,"PWY-6507",2283.41798295597,1520.32812365355,1722.13586264728,4122.78095123559,3099.59572910098,2664.18762241519,2445.04284016154,4356.43672181266,1938.52751910299,2986.76772645015,4468.70333884323,2642.49925842502,3763.58786036788,2454.15712876409,2598.07198228229,6557.23157799868,3743.58975867468,4473.5241568216,2499.55729717383,1972.82761307207,2407.66648987125,4278.7145144584,2955.0991730…
272,"PWY-6519",10422.1192961987,6395.21604475372,6824.59252428917,11296.5102337871,6979.46187299103,6193.98976568975,9470.94172222668,11744.4609318408,5747.46943878661,9395.50389333214,12943.4900896861,11141.3051867677,9049.37264612611,6568.38192633664,5535.20171927667,10675.7295662292,5068.76524391799,6566.38084178609,9321.41648649166,6682.86820244809,9220.26034131415,8642.44724437398,5758.96874…
273,"PWY-6545",10385.7998064504,6058.76204591357,6308.40470590452,12878.0882908352,8313.03023327654,6674.23892373076,11559.9145156891,15942.3307556928,7443.08456742227,13774.2947592704,18232.2462756191,19975.5349367758,8962.55109068344,7049.69324623872,4887.30781771072,16120.3516014174,7430.08426575946,9206.82698860638,15912.0000679509,11921.9626320567,16828.199386863,10046.6479239615,6234.065604…
274,"PWY-6562",332.118937279953,270.192279797826,405.340822322469,1042.64653533708,729.294351879777,636.877783494673,961.361260490162,1309.97268318674,442.199044641805,392.551341981549,455.533685538578,407.8964153834,1139.8010840391,964.036196888684,746.64603270449,695.468772759365,297.201584589411,344.563127173459,303.883216034032,420.19245570422,398.162004335605,801.156788398254,608.30781894259…
275,"PWY-6572",62.5933886823206,0,0,1.97533009281551,0,0,0,0,0,0,0,0,0,0,0,0,0,0,0,30.7092651757188,22.7475646237631,0,0,0,0,0,0,0,0,0,0,29.1325824935783,19.4201567787243,0,8.77241145088938,0,68.5209766720562,55.3214588634436,0,0,59.1569144377176,0,0,0,0,29.415829494405,188.098799423148,0
276,"PWY-6581",0,0,0,0,0,0,0,0,0,0,67.973722374374,0,0,0,0,0,0,0,0,0,0,0,65.667580910587,0,0,0,0,0,0,0,0,0,0,0,0,0,0,0,0,0,0,0,0,0,0,0,0,0
277,"PWY-6588",3257.8252079195,3087.64164853334,3096.64187495559,6360.32525950589,4649.62921687889,4364.51314763915,5021.17372618851,5208.73341273376,3849.89352498926,5521.15697290869,6436.10823038768,6183.61335117937,4136.25271323751,3713.73771266242,3522.19852647021,4463.46333023473,2664.37576033712,3566.88765730991,5462.42835797974,4446.95774189529,5782.75628020538,5709.09558336364,3460.922373…
278,"PWY-6590",2025.31843091092,1995.60149852549,2214.00304012891,3182.7319230432,1983.78275659461,1798.51041747536,1460.0121053833,1625.7063634657,541.658965312889,2376.40134560964,2013.49663101761,2109.13786142053,361.125801540433,301.007529151954,0,2413.06482020763,1214.70388264889,1888.22908197457,1292.07741227667,1297.51734070304,1437.90524794466,2908.97010459687,2085.47644995552,2862.065538…
279,"PWY-6608",14280.9508128619,9397.16822608712,10536.026921735,20145.5214636448,13794.1527031267,11603.3753454606,18048.175649374,23773.7175130745,11165.3933675332,18217.9980214533,23651.1732953262,23167.7225093177,12875.1824298877,10771.9706333335,9455.3227130786,27744.8287836599,14592.0738395236,18178.9491406672,19279.8397864669,14158.3238756088,18802.475442768,21831.0658038036,13779.36222587…
280,"PWY-6609",12496.6809664473,8182.15194106534,9133.49293981535,16595.7535050536,11326.005953438,9628.94528437541,15545.8984636543,20802.4037879473,9436.91045031443,15503.7277455466,20417.8841602022,20353.3674266758,10932.2008963697,9460.47763609982,8065.55771039587,23897.680285471,12691.1723265782,15813.4355572212,16315.8109798965,11994.699092703,16097.2210862142,18991.2675986429,12192.1622965…
281,"PWY-6612",15329.2172574038,9841.93115456648,10532.2006149845,17882.8579302568,11937.1505873897,10424.6968007951,16673.4290219602,21562.9931779448,11141.8635085162,16768.2196077231,20283.9575033702,20665.3128604615,14410.9332262872,10637.7944897443,9835.64028818054,21871.9560433641,11188.806624465,14447.9213709716,17277.2133843656,13453.624968228,17245.28088565,16696.2089198381,10672.24850958…
282,"PWY-6628",11478.3500670389,7343.44444179903,7961.90327230136,14150.0200324858,8372.02304302199,6763.5898591036,13643.3143490919,18505.351732979,9320.23997170554,13186.1691081949,17783.4881824828,16989.4825668143,12680.9375911756,9124.30643446499,8461.80273935258,17938.145408076,7615.48325801575,10995.5362082234,14834.3451110478,11024.5755601442,15137.9837527324,13460.1272606172,8471.80576995…
283,"PWY-6629",0,0,0,0,0,0,0,0,0,0,0,0,0,0,0,0,0,0,0,89.6531996911842,0,0,0,0,0,0,0,0,0,0,0,0,0,0,0,0,0,0,0,0,0,0,0,0,0,0,0,0
284,"PWY-6630",11398.6080354242,7281.70857992652,7902.93997311237,14032.9894131485,8311.70036307153,6715.51524388882,13545.9669231844,18358.4416890488,9215.60015514466,13101.5266972657,17661.5264911363,16892.2474362443,12538.7254812342,9051.51940394014,8384.07844984206,17831.3268802659,7587.28834049233,10941.2152167964,14726.7203945295,10949.3835445459,15042.6373274456,13371.5146192299,8400.39722…
285,"PWY-6641",779.349023897638,508.175943690595,390.14290515987,911.72563380474,853.785107087096,446.889526779293,552.687750285604,1001.84739896897,244.856878813539,1190.57600939918,1879.86539849704,1406.54472929062,587.63077110198,612.413627268128,72.0433013868702,463.926188425921,230.755372227937,276.526867959615,1292.84749254003,954.263424044108,1230.07284647402,474.769598053216,248.863119624…
286,"PWY-6654",0,51.888811037305,0,86.8262324588047,0,39.9376839191653,257.385259000627,257.755610714938,87.6961808227506,75.8664764986244,101.807539885404,0,29.9728079415941,97.6471833883469,51.8870393657873,121.668493870102,0,172.892249294292,0,0,65.9048313215619,129.515989029682,115.388720788224,89.7512211004318,376.117332853674,164.572203941633,312.290376095578,103.720376398354,0,167.03179219…
287,"PWY-6690",636.773694252702,381.804656017449,229.908325731303,1538.32841404691,1077.67075332863,902.244524641444,985.116674843593,964.143885922915,518.822060801299,632.873054620856,1022.15196186631,1095.90985404966,709.940886304301,863.222386880816,864.982732829993,684.65066052721,328.33849170771,595.308965461665,818.892183138271,633.469877212918,879.309988054819,408.907842057386,193.35980056…
288,"PWY-6700",16806.5724079824,11045.0396155457,12152.8619064173,20070.16513613,13745.5942788056,11236.893877432,19769.4790622155,25883.8513464686,12105.0802240018,21392.2121886728,26784.3378962466,25259.4973213719,15860.6204772152,13202.1883908166,11871.3336827686,19376.276219927,10142.1177834261,12875.8213190098,21612.2142729201,15783.930094552,21325.3945921073,18596.0693263635,11884.831670593…
289,"PWY-6703",14869.7907345121,9753.55418821273,10711.1536619285,18347.0283321378,12025.6720796927,9790.60357293776,18267.5325485433,23043.2858309043,10305.227346437,18637.437091319,23615.0204134281,22770.3950291898,13526.6471362918,10962.0508795393,9642.53382203853,18031.2394215903,9363.85622574378,12258.307746664,18968.4513621081,13640.9246557045,18651.3794847093,17670.5948586045,11184.1884793…
290,"PWY-6708",12113.2149667309,7710.29003614602,8099.70895158698,13225.8222720575,8539.11722805793,7106.21470448676,12013.9171770657,16424.9475900331,7879.00433634054,13757.0820178318,17335.8668151913,16449.8367303527,11091.4451857263,8289.34990631562,7402.2190747416,13334.1901102903,6211.00659660524,8496.7816832494,13811.1292221257,10088.9315345959,14007.3106808901,11083.1797063666,6936.1905219…
291,"PWY-6713",0,0,0,0,0,0,0,0,0,0,0,0,0,0,0,0,0,0,0,17.6358709902456,0,0,0,0,0,0,0,0,0,0,0,0,0,0,0,0,0,0,0,0,0,0,0,0,0,0,0,0
292,"PWY-6728",147.669321775062,0,252.729791250339,978.133650061701,310.406454186741,242.022887712582,1428.53235050009,2476.85507688138,755.573717304657,2144.58574519598,1721.27464249556,1573.90301659271,1965.34960084754,2126.00848072015,1737.07525710539,1826.81124128823,894.62513491225,1055.57731707261,1469.71468143425,1710.64565461796,1281.43004443886,906.607335469206,1218.15319649143,752.91326…
293,"PWY-6731",0,0,0,0,0,0,2.49773587240645,9.97979675519655,117.959763051984,0,91.159017704082,138.277994630399,393.572964138445,230.598882890233,130.677926691188,25.1020254503829,15.5342603984296,0,124.158556590812,116.661332471202,310.5475713874,67.4583420233045,33.9074897848351,119.829723602876,4.16750356887428,66.4330849201395,33.5671386284911,23.0064115468802,18.6532773914594,24.20642382736…
294,"PWY-6737",13713.762541612,9028.86610586254,9664.62409192873,17239.7167238987,11863.5789333723,9535.64720216269,16344.4119165441,21098.5404297242,9948.19558143924,17930.3481733111,22671.1387568878,22670.8212000479,13571.7441670295,11273.3229601488,9898.24598006347,17899.8900524886,9773.52567275181,12533.0981108466,18522.3668786047,13731.3236056704,17893.1866490394,15764.6121709805,9869.163492…
295,"PWY-6749",1043.27820401551,550.768649714889,472.364358437489,2705.72229367639,1725.95515235233,1630.75011421207,2646.42312340887,2900.94338518557,1085.61848721571,1506.49248827026,1891.45818189301,2313.61292371185,1013.6208467886,1005.83612610804,407.794304432061,3594.3149689332,1725.79343627055,2484.92772664648,1770.49969981219,1172.22568770003,1532.76663531027,3925.30589911513,2653.8850927…
296,"PWY-6830",0,0,0,0,0,0,0,0,0,0,0,0,0,0,0,0,0,0,0,0,0,0,0,0,0,0,0,0,0,0,30.3320334774243,0,0,0,0,0,0,0,0,0,0,0,0,0,0,0,0,0
297,"PWY-6876",3257.8252079195,3087.64164853334,3096.64187495559,5328.31269479771,4564.63882373403,3132.73573462521,5021.17372618851,5208.73341273376,3849.89352498926,5521.15697290869,6436.10823038768,6183.61335117937,4136.25271323751,3713.73771266242,3522.19852647021,2854.32646853161,1582.01195314129,1693.43372236238,5462.42835797974,4446.95774189529,5782.75628020538,1926.31949156675,984.4132432…
298,"PWY-6891",1211.23701166602,1335.69817963957,1639.38337141134,1322.90831399509,1052.57358505301,1050.11189256956,636.99518561746,402.291479599986,304.395325914612,1065.18352760028,729.51231812418,1015.66774423224,181.301461240611,176.32208692941,0,1301.44411141377,759.870100548944,935.732378797235,914.832344417128,1048.8586349982,1064.90516487328,1772.92920981317,1172.22325201633,1582.6112504…
299,"PWY-6892",8114.41100677802,5274.09695220686,5071.1343716244,9114.88154977657,6514.78865540166,5618.5728583157,8292.42110422752,12483.5466968839,5622.97529875574,10116.2010696659,11729.7873791122,10519.9481174615,8928.18309947289,7458.08804310867,6875.90034857154,7491.03562223951,4256.28294525228,5786.06694667005,10025.9930698824,7755.75600221885,9562.10432128148,7064.8290290266,4784.39190999…
300,"PWY-6895",4913.94959153787,4754.12134739447,5613.13562234674,5423.54358692244,4184.89004580585,4002.22587252254,2877.00714027119,1913.24993119493,1405.74167486412,4553.06064225707,3341.73837388696,4496.89536574849,873.01375123881,843.294199905314,0,5470.71132188295,3142.21714280301,3873.29845772066,4023.33919311515,4334.43912723238,4592.81374418546,6776.77902031765,4419.30712938135,6016.9371…
301,"PWY-6897",20855.5431018968,13221.6712069152,14226.7252529103,24063.0718566976,16271.3144211344,13443.7965207877,23783.5035679824,31414.2330066022,14656.2374207994,25012.0557599132,31769.1208809328,31436.9860183312,18690.7132993291,15344.0824969155,13451.3946916355,28238.286270323,14833.2206695993,18423.8797606038,26984.2729877763,20093.0585089425,27026.9147940241,23157.0241117896,14402.98880…
302,"PWY-6901",12018.7262299818,8206.04796059405,8902.49994547917,13945.4944864496,10026.9868782434,8762.00270016572,11371.8467664137,13243.3988791441,8016.13096892735,12877.3802244408,14710.9934384766,14999.90776716,7790.9775401908,5150.37979270475,5329.2127290233,16920.5111640047,8698.61908078459,11026.0120930745,13138.9145571004,10446.8157529647,11945.2366187267,13480.9217441023,8996.386531410…
303,"PWY-6906",0,0,0,0,0,0,0,0,0,11.5293017775106,0,0,5.81388780888518,0,0,27.3009912581747,0,0,0,11.9255205253722,7.37912945494812,0,0,0,0,0,0,0,0,0,0,0,0,0,0,0,0,0,0,0,0,0,0,0,0,0,0,0
304,"PWY-6919",0,0,0,0,0,0,0,0,0,0,0,0,0,0,0,0,0,0,0,0,0,0,0,0,0,0,0,0,0,0,0,0,0,0,47.4213836477987,22.8846153846154,0,0,5.7542662116041,0,0,0,0,0,0,0,0,0
305,"PWY-6944",420.900129523662,0,0,187.929268148075,551.954137990523,0,919.625772744411,1204.90895155482,270.347453901435,34.8177352433276,839.426537540833,1190.38015285455,908.221495278831,730.519495491567,827.523451286309,1051.87889349136,524.698202069318,633.834388133504,0,625.265092899034,584.059906726939,781.021354742811,363.452737417153,768.120331722029,865.785368794394,347.368912115773,15…
306,"PWY-6948",558.457637844293,355.37620319198,97.363319160947,819.959956955569,575.450544635601,540.713006225123,739.544195189267,714.353970615552,448.360842460498,638.829906045597,899.522792736705,1072.01414241339,551.418558963832,529.286967002121,408.577648511726,294.80051802793,0,358.225504849049,1003.19988418355,692.679505008346,618.23294452983,424.650949486384,0,423.975260068355,224.835199…
307,"PWY-6956",0,0,0,0,0,0,0,0,0,0,0,0,0,0,0,0,0,0,0,0,0,0,0,0,0,0,0,0,0,0,0,0,0,0,0,0,0,0,0,0,0,4.98994063476309,0,0,0,0,0,0
308,"PWY-6957",436.136961449308,233.280782461081,0,641.196881127226,246.918705710192,0,421.322950610486,454.909029411124,99.6088446508359,790.436971442407,937.658202417835,685.456236371432,860.548369471915,714.245295945607,392.208407467495,584.77348848213,150.467880357956,310.993981789415,608.768284852368,822.595928512431,856.081688280753,286.031519636448,0,206.587859462935,0,0,0,0,0,0,850.797546…
309,"PWY-6969",25694.5900439465,16343.7034718417,17701.8773014094,31755.4900743881,21823.0320856042,17846.6748040881,31643.4233766671,41424.0986363774,19324.3758916487,31923.2058586545,40663.4228537989,40539.5346430847,23563.3033725361,19285.47907151,16875.8159488464,38390.9056829455,19968.8762583155,24997.8777445564,34237.7570113723,25593.0037323583,34435.8346330104,29990.6400652236,18545.949318…
310,"PWY-6992",153.133970198525,85.0878613657821,192.24588266709,690.35085234329,525.840846329102,263.139463601646,352.150193998628,364.506819033692,244.837853301369,194.06728014572,203.13974669767,445.690806356432,451.799693615925,365.058803427009,316.805170284023,867.260439440103,170.51543292329,184.619415801424,212.926505351194,17.464970247793,107.56402804528,352.656568421857,51.5239514280391,…
311,"PWY-6993",0,0,0,0,0,0,0,0,0,0,0,0,0,0,0,0,0,0,0,0,0,0,0,0,0,0,0,0,0,0,0,0,0,0,0,0,0,0,0,0,7.12463117153887,0,0,0,0,0,0,0
312,"PWY-7002",0,0,0,0,0,0,0,0,0,0,0,0,0,0,0,0,0,0,0,0,61.8532929094834,0,0,0,0,0,0,0,0,0,0,0,0,0,0,0,0,0,0,80.1160242361738,65.7515675858085,46.2234995517589,0,0,0,0,0,0
313,"PWY-7003",826.471334565633,811.953238312128,558.762781296573,1504.287760544,912.145839310269,1144.99640346966,394.91319563747,526.230174569273,452.627419431257,1421.14388628391,1457.12589002355,1000.43740236092,842.453770883584,471.885607995262,339.858745671829,2163.96516698901,1000.11515172791,1223.36898711086,1271.32475437192,956.348507144162,978.929626235174,2057.42089401291,1555.01912896…
314,"PWY-7007",4547.46855191468,2887.50428842351,3023.97652931774,5364.6679511492,3811.15634075273,3326.35515603763,4195.18423079222,5713.42479281561,3688.05902472247,4632.54759135808,5175.67687314896,6748.91545275609,3793.02196325153,2851.67799447115,2678.44583709668,9489.57167632776,5055.17802799831,5929.03270804753,5103.42902434345,4877.4776825439,5222.71170134114,4329.60266454116,2630.8043221…
315,"PWY-7013",207.508102707209,0,139.670263153556,602.665029010132,437.520514032277,582.928651875945,856.792554809221,151.826548473786,700.335009670233,719.263533793279,678.714551265189,1181.93209715145,923.429798276355,1470.71320386855,1981.55392540884,718.000040003838,47.1252616327926,1555.36277935855,676.154327886462,746.649206555438,1054.6889647599,1275.81139965353,0,936.589325994916,484.118…
316,"PWY-7024",0,0,0,0,0,0,0,0,133.893105027123,0,0,0,0,0,0,35.3262019198818,81.1468572693591,31.0265806616901,0,0,130.333533959991,0,0,0,0,0,0,0,226.021211781974,146.986766189725,0,0,0,0,0,0,0,0,0,0,0,0,0,0,0,105.371164368181,0,0
317,"PWY-7046",646.252430275439,424.186762358639,439.098044404791,321.118892105478,240.618666780459,81.0861059843415,346.329240578911,521.217854022033,262.180822480947,784.94498071918,909.015671782837,785.757272994128,368.209673096104,295.634546139654,354.499967665924,161.219304879923,143.400368282736,124.62886131366,863.670415542725,663.347587049771,864.545687174088,129.002637923889,51.057029856…
318,"PWY-7084",47.4526267767033,102.782487652128,56.8258559156678,0,0,8.5108099117854,0,0,0,277.025494843387,243.589934764453,157.544649621537,0,0,0,86.250565669721,52.1149752988858,22.9284212217069,87.0464229266903,33.3675361567579,63.3992494332912,335.452907604035,193.766110263327,387.38337122246,152.499796725604,143.846262327148,20.0804501198178,152.537899461769,145.498985209944,66.78082979912…
319,"PWY-7090",1097.52415853235,520.151573385309,745.098909670293,1031.6146872567,546.806352669852,520.833070671564,1028.65612245054,1788.51266219668,679.810992432139,971.849682340977,1168.42851291973,749.071600580066,668.790700011728,406.68113182709,424.381731759472,1332.40204398704,481.862366031177,848.3064468868,1067.16269523703,640.636544178358,1116.88168329128,892.112170021012,755.1324783225…
320,"PWY-7094",22364.1069196728,14859.4108739024,15257.0418424203,29453.7325394101,19923.3515926854,16575.6047015661,29784.4073563734,39532.6495865408,17997.7210948477,28971.6492897745,37407.8893729869,36779.3887101798,20634.1573693076,16946.9272547131,15159.054388562,37831.1563941511,19037.8400834764,23395.1377883235,32958.145112119,23815.7265783194,32309.4266124685,27637.0999560971,16136.712183…
321,"PWY-7097",62.8943551041155,0,0,337.559748987984,173.974243397127,0,345.229273763817,492.854962445048,135.16929483899,176.651250672474,655.519991479005,480.816744427149,761.585938122987,211.85251287979,302.730361342218,990.323619510478,323.197474824336,349.279959927487,266.073786691048,385.976089561629,321.662697484253,508.202184728513,452.735806347269,633.845598411025,236.302715315884,116.51…
322,"PWY-7098",70.5932049054717,0,0,376.794214390306,194.772702052096,0,385.215061084547,549.732332590542,151.341276726406,197.752413531894,727.608932829403,535.303061903559,842.962146938458,236.743123255171,337.316718068485,1093.87791775062,358.883669997412,388.620759835589,297.392005884402,429.62385451808,359.100570987406,562.068998222383,496.263211462279,696.750129628198,261.360861143675,130.2…
323,"PWY-7111",38291.9776492256,25455.4300011941,26823.8147068589,47491.4462278383,33226.319944519,26897.8144181039,46467.4451727716,60116.8249200707,28736.9397765668,49009.5417278963,61979.4270174336,60221.2623494479,36972.7255510446,30997.6955361452,27490.4256265714,52948.3898311386,27019.9018299877,32555.713657041,52844.0431985502,39890.6104936274,53066.4577037916,39627.1182892344,24467.244298…
324,"PWY-7159",41.2778994603827,132.583379156981,13.6683263481513,20.8366403413776,146.698366035352,8.99245362410479,87.9555925384856,482.438267716853,340.629202248267,125.898722383201,602.598477993113,243.217196893727,266.327306848381,196.01609487891,0,873.695540354128,329.722714507981,545.921378704981,564.196481524308,421.721387255093,599.91317954704,824.506377518326,576.424957699044,760.293068…
325,"PWY-7184",18560.4478014966,11809.9655240387,12639.1064378726,21909.7370913887,14901.1550843151,12576.2208243097,21516.426170639,28072.5040094124,13733.8695097529,22093.6897620994,27505.879448449,27129.6562490043,17073.6787341206,13580.8834214621,12362.0786348274,25501.2060274785,13239.1898391676,16742.8101917056,23025.3276123718,17417.4575607565,22850.6346890962,20252.609562054,12809.7455913…
326,"PWY-7187",6021.70365602858,5065.97230374753,4887.75078933301,8028.02315741484,4482.08196168816,4132.94575377717,4988.46919464244,7197.77848650911,4327.15826641781,8028.15521643836,10860.5576778339,9901.66727781756,7706.06943084044,5910.91888386589,4890.9623373997,7141.97071913087,3669.97605217149,6007.12697700897,6208.03096576954,4963.30556958246,7721.51188417251,7201.71677178166,5242.990758…
327,"PWY-7196",12924.8399261168,8592.59825552444,9964.42550968635,17617.8707174649,12385.0518205021,10347.0059325339,15960.8777762527,20498.3606773175,9494.04037129453,16690.2379141413,21498.3506920964,20767.431513757,11561.1818105993,10041.3753009749,8740.39656075023,22728.1331285657,11967.4704473105,15015.4894769995,17323.6333004297,13193.8179162659,17249.2833611453,18225.0726729509,11663.61875…
328,"PWY-7197",19966.0130179634,12753.5360803746,13658.0520500304,23779.117899502,16049.4575487505,13320.1426743453,24191.0890826635,31734.0664508459,15055.394817004,24543.9093879263,30981.8437315584,30810.0905762908,18045.6844629696,14806.984194141,13265.4147987357,28319.2585698223,14705.2563322539,18234.0577907923,26368.3372840649,19712.9233194881,26576.7655900832,22790.6590363114,14258.8424350…
329,"PWY-7198",649.152093893062,128.544263461722,622.337281104301,97.7025636813481,120.68023315594,125.151095427426,805.018431882899,920.653278253376,269.405589075235,671.878423272381,1049.96443918239,973.146539904161,389.35975573727,252.306965878369,0,260.651909594126,0,190.9837581747,866.342283485071,621.671016740203,1402.2180553372,426.031524973738,245.254222206324,565.336590940245,729.0617864…
330,"PWY-7199",10926.9876078594,7134.01723430069,8224.74119746586,13616.933765866,9344.75785176515,7746.94104079843,11992.0809170227,15624.1376249758,7802.74519306176,12544.8890666816,15758.119121078,15645.0651919004,9425.88362690218,7244.43761043607,6499.73125198657,17795.3224281981,9468.55293220942,12444.6853790222,12728.586689598,9801.85492712926,12659.8975460448,13817.9329839507,8954.23487238…
331,"PWY-7200",14233.6665118776,9150.20198981172,10346.6817534872,17346.9831913558,11791.1274987096,9802.83177520792,16206.5526001325,21204.6406473812,10396.7693232249,16555.1017693828,20936.74661555,20702.041122902,12456.3518186328,9810.91516019472,8797.76688653719,22233.7312475603,11735.8366970634,14983.4846758686,17211.0223847062,13108.1183731788,17182.5966209092,17516.1366134436,11173.2262991…
332,"PWY-7208",23931.4913704829,15319.6307377867,16449.1379441113,29025.762779542,19692.2959266416,16472.6106818594,28958.67591488,37983.465600306,17889.8094612341,29093.0825523369,36897.0535777832,36695.6246224152,21854.50781036,17715.6082734233,15669.6918688042,35487.4391670585,18399.8361779533,23260.3478764817,31168.1707202384,23246.0597425314,31091.5459316539,28508.7333019194,17945.3966369069…
333,"PWY-7209",0,0,0,47.332185037949,32.3874328021377,0,0,0,9.9848794878042,0,0,0,0,0,0,119.089857095196,47.2180876268719,74.4573749143706,0,0,0,113.9445395629,71.9199484497908,128.66013481472,49.6657353705076,0,27.2393902964713,0,0,0,0,0,0,0,0,0,0,0,22.4275279494274,0,0,0,0,0,0,0,0,0
334,"PWY-7210",919.145266312001,183.123642408344,877.980645556081,139.422054679976,172.050438795284,178.308619456537,1140.46529682587,1305.84119015962,382.963253009333,953.206263144375,1487.80397322488,1379.88636631939,552.81059990719,358.774725167365,0,371.569712408739,0,272.133032344653,1228.21586997731,881.268863997095,1979.95678824509,605.944351300536,348.923210194626,801.806401431985,1030.36…
335,"PWY-7211",19855.9756025254,12626.447851296,13312.8312026998,23601.1265472439,16157.7450316874,13499.6833418416,23159.3119786579,30530.4940883923,14634.0328608526,23728.5237468219,29784.926104087,29250.7371588445,18298.6895489913,14686.686462929,13202.4653752224,27951.3401834017,14588.657233236,18244.9562881467,25060.4139919498,18787.6729835566,24999.424623593,22231.7743438716,14088.346856328…
336,"PWY-7219",24215.0821261874,15430.903304628,16583.7452636752,29535.1075806022,19882.071512538,16673.2381820894,29528.452019572,38946.4991498088,18342.2059215616,29957.4329015536,37837.5110594087,37641.2632236154,22435.1490107431,18338.3786544527,16102.1496067515,34764.0057984919,17883.0475631687,22460.7681259998,31674.5593056371,23699.8165999406,31929.440151112,28221.9312956665,17951.34259595…
337,"PWY-722",529.093701684685,367.613920077141,247.382198711241,605.128595489233,424.398249279258,306.743423744176,398.625560155652,348.884486951104,232.893946481489,474.541809984618,531.644660655403,513.15356252482,450.223665247085,368.047613981514,190.098927536532,270.761749390983,30.3800525191047,36.3912864869889,713.80691194198,599.793605177746,661.658999537223,2.96702021392883,137.610996123…
338,"PWY-7220",23132.7497403793,14780.3679953448,15866.2481717363,27604.7968361477,18767.4896460954,15515.125986245,27502.3290958907,35953.7188562389,17009.7981197368,28119.6516362292,35592.6338481507,35232.1080847474,20702.9537136234,16775.0151579886,14945.8539214184,33447.732439632,17286.5226183241,21504.1050743974,29981.6098225042,22235.3517320929,30197.4676040555,26572.3328560822,16712.247379…
339,"PWY-7221",21893.1593505484,14039.6651290781,14993.2359895895,26071.8793823725,17866.3895496487,14829.3789570026,25988.2222273891,33932.6175332896,16256.5975197729,26258.3371571443,33331.5043697698,33488.2056000915,19581.3279584668,15718.7358347164,13983.0117786734,32604.3323482384,17004.9466053572,21031.5738052925,27997.5641547511,21095.1264179192,28214.3191438985,25343.8260109306,15818.9693…
340,"PWY-7222",23132.7497403793,14780.3679953448,15866.2481717363,27604.7968361477,18767.4896460954,15515.125986245,27502.3290958907,35953.7188562389,17009.7981197368,28119.6516362292,35592.6338481507,35232.1080847474,20702.9537136234,16775.0151579886,14945.8539214184,33447.732439632,17286.5226183241,21504.1050743974,29981.6098225042,22235.3517320929,30197.4676040555,26572.3328560822,16712.247379…
341,"PWY-7228",22921.0661517726,14699.1812518132,15711.2601602984,27272.8247561275,18604.6034931156,15415.983854344,27162.1876536362,35475.6501494758,16960.4160152979,27599.5545602809,34997.464846055,35000.6281638437,20486.5014257129,16502.7826562547,14686.4754803376,33742.2090189692,17539.2540065856,21741.6941689148,29439.1520813665,22056.7045253276,29677.6904662396,26274.217246953,16434.7274073…
342,"PWY-7229",24563.0399327761,15704.3454760916,16816.609801849,29567.0779232271,20033.1287627897,16672.0246022367,29571.5168226104,38866.710182402,18297.6658247192,30144.0961234974,38136.5920811892,37783.4615492918,22436.6626397407,18196.0852246408,16060.6933721843,35317.6765218311,18228.0767769016,22830.7965893574,32030.6565446258,23883.8285109109,32249.9284249894,28378.6070895817,17986.563257…
343,"PWY-7234",18239.7996618288,11754.9144399498,12785.6292828096,21518.9819321677,14626.7892231118,12118.5336764135,21300.0286700758,27875.4397455673,13353.78691361,22231.5566139558,27701.4727245919,27429.486249584,16720.3326597158,13403.3366708316,12062.4808933204,25044.3453168355,13015.9645865513,16531.2407992721,23099.994623117,17519.3309498425,23160.3380542098,19807.2916347635,12399.24766046…
344,"PWY-7237",4160.05,2431.39,2635.67,5641.51,3861.77,3407.31,5325.96,5494.25,3921.88,4193.2,5078.6,5977.52,4950.17,4065.95,4276.33,9628.4,4304.55,5659.96,4707.13,4196.36,4515.17,4978.97,3285.33,5002.08,2492.43,1584.5,1046.33,5819.57,4700.41,4201.32,7325.25,5185.17,3632.92,3225.86,2755.95,2892.83,4267.08,3867.73,3327.85,4297.15,5954.08,4391.87,5311.74,6606.21,4042.01,10201.66,9108.13,5681.07
345,"PWY-7242",8388.13497914627,5255.92425595159,6250.44891026543,11291.3745959951,8729.49331860458,6869.47052658156,8738.07219130143,11153.9569595387,5033.6207968841,10192.2177546972,14112.7401848428,11613.2062929106,9157.25116055821,7467.71688257017,6365.47227703868,12871.3086634954,7273.98359292847,8187.75701656766,10340.7225483183,7995.27276928124,10020.9466581387,9854.67849814983,6466.889552…
346,"PWY-7254",7977.32740305019,5529.09954007839,5988.59355248333,9829.84311749212,7201.06091015262,6508.61742964714,7088.15339102803,9701.78495602573,5347.87308059989,7658.32275502743,9161.63830113095,8993.66718026563,9098.19323541394,6911.26873223261,6443.8765671854,14306.3811335136,7013.47126947323,10382.9110044271,7586.33307489871,5609.27025505314,7043.92012689471,10225.3272309488,6766.102116…
347,"PWY-7255",2575.88136363238,1369.26274290299,1245.62000334673,4005.81882110204,2806.22565142698,2589.52353988099,3501.88780853238,4546.66357743673,2404.01572295079,3279.50190666137,4091.39859361539,4861.83006878309,2063.0653582908,2042.77281359213,1885.85079192493,5723.99571091154,2803.44156964646,3204.09727385617,4122.96847239122,3059.92889755157,4030.13204498043,2338.57569826602,1301.273750…
348,"PWY-7274",0,0,0,0,0,0,0,0,0,0,0,0,0,0,0,0,0,2.28567221452436,0,0,0,0,0,0,0,0,0,0,0,0,0,0,0,0,0,0,0,0,0,0,0,0,0,0,0,0,0,68.5266083055968
349,"PWY-7286",0,0,0,36.3675572007221,0,23.8487870065734,146.135472991666,133.438498450626,58.607879553221,0,0,0,0,42.3047510435399,0,0,0,0,0,0,0,86.5835787377105,71.7182313546708,59.9545911157013,220.735956657236,110.405617873108,179.799913433371,0,0,0,19.0844755020688,0,0,57.3074443040174,0,40.152780888273,0,0,0,0,0,0,0,0,0,0,18.480463522426,0
350,"PWY-7295",1919.94704451401,1113.74271335886,1458.14009943909,317.359610719537,220.477995729035,210.631263525914,156.585704858135,254.61470565365,0,557.876933232383,744.956008049534,493.93722989765,689.379658588408,396.65151952425,428.949203955824,783.514528285124,0,1045.96919933974,750.871844296481,679.924228474371,927.577516749201,1043.9814951695,962.883205071337,895.224075474188,269.254603…
351,"PWY-7315",1109.83716600491,904.255298310894,979.627811831866,1232.39142105429,854.597329776203,686.762867035488,626.862308842487,1103.74730573502,617.001457457902,1111.11572510131,1282.27636993213,1036.62648533686,1115.38287854641,863.870318552842,751.980825204062,1599.2715294651,662.924426356309,856.29854444342,833.893298040129,673.438931534949,963.584483496543,301.690020514597,493.05267578…
352,"PWY-7316",0,0,0,0,0,0,0,0,0,0,0,0,0,0,251.937402601713,0,0,0,0,0,0,0,0,0,0,0,0,0,0,0,0,0,0,0,0,0,0,0,0,0,0,0,0,0,0,0,0,0
353,"PWY-7323",18105.9817181993,11522.3575554819,12258.8570528617,22375.6437106771,15572.6857182144,12548.8348468951,22247.5086242139,29797.4708322541,13627.6053445391,23151.6849930606,29348.6419055237,28445.530828666,17069.5817721944,13834.8754007674,12198.9106499618,26489.5441233087,13760.3626709263,16926.4864899663,24521.4328930571,18359.827363122,24177.7863417984,21133.3742723089,13238.874781…
354,"PWY-7328",8285.2937826156,5405.82089296496,5590.19557844182,11355.769622238,7681.92645754541,6390.55297861202,11335.3491283351,14252.2244929438,7926.45175251602,10995.0869105986,14021.7278500208,13080.3673240138,8416.61528248104,6077.46627132256,6374.03363882036,15128.4654755244,7890.75367905165,9643.28313886897,11414.6068205319,8841.06815022922,11039.5546499622,11810.2929898554,7358.3777825…
355,"PWY-7332",2070.94986824742,2236.43645012079,691.044232670335,3687.30191209649,1932.87613381026,1874.5304694801,3928.0520929184,6784.27189137689,2502.34886791601,3264.70235065487,4125.821842131,2363.19226381446,1646.64691987214,1472.49903241954,1835.83865385228,5594.72650093926,2705.066055834,3770.48278784085,4074.74269849046,2232.11001544015,4205.84613144561,3009.24758653919,1689.74780185781…
356,"PWY-7347",141.255236952371,70.82625211833,52.0730791099897,314.900188681922,261.245389823276,222.702883325251,100.423739283245,81.1753114265348,63.6630093872831,321.551798802761,331.30632823223,184.337682149271,61.2567164420906,13.4829611707839,54.4289218939688,197.371797429763,44.6790475559765,81.8513198846256,80.4099460883985,52.2176161115489,121.778505236768,395.906074519678,242.944130816…
357,"PWY-7354",0,0,0,0,0,0,0,37.8218181818182,0,0,0,0,0,0,0,0,0,0,0,0,0,0,0,0,0,0,0,0,0,0,0,0,0,0,0,0,0,0,0,0,0,0,0,0,0,0,0,0
358,"PWY-7371",6995.47008176557,4658.471439465,4927.29461995306,7211.44518643235,5308.48635981439,3946.76263279096,7685.51930490296,10595.4828303244,4128.40258522356,8969.62737207407,11615.5352377388,11216.1294966442,6979.40458403649,6261.17718266569,5249.57746656726,7326.01981317915,3881.3308868218,5443.23711449523,9743.87871739004,7335.17107870971,9546.84054431077,7898.38717622284,5033.54342526…
359,"PWY-7373",542.498417730301,563.729558482695,652.133304088222,428.055767709238,597.005821452212,392.384641395209,0,0,0,341.935916162152,294.299244194227,317.12932103411,294.383223365382,11.9827756063579,0,0,0,0,664.212256263418,817.445371652876,645.516008882513,67.5637399559084,55.5366013443426,0,0,0,0,0,98.9275407542419,63.5409714332675,103.204444897779,0,0,0,11.9829715079859,0,621.390518793…
360,"PWY-7374",4043.33356137357,2562.18472363856,3271.86101263475,4907.98869203875,3465.69821333899,2473.1082739008,4106.96660463192,5020.71021962569,2384.78987194576,5159.18705015861,7788.3288543413,7761.96713690899,4129.04577717195,3882.8991200307,3132.52988018437,5926.27389059523,3461.12461942288,4146.16537106955,6002.37719858261,4691.78326413601,6340.36095941308,3459.12799695737,2562.56338833…
361,"PWY-7376",4338.10004754729,2936.57861089618,3129.91134868208,6963.27750385572,4649.84054704408,3866.75665860142,5613.07875061657,7302.54633612684,3528.47172549988,5794.55721439216,7227.83877716271,7689.35945358779,4921.68649951278,3795.92209148371,3576.35430508937,6877.91698057046,3486.16709260528,4334.01081047389,5964.80620492721,4968.30262998447,6290.8146992593,4445.36576983401,2651.257248…
362,"PWY-7377",148.451179972746,391.536287532899,27.731409459712,1955.99476626544,1015.63094121787,964.16256532048,884.648244664108,837.83343129694,356.820473206319,1126.19868087666,1312.29893880789,990.015287129448,565.628374765986,515.274810150003,172.657176007827,683.352960621022,53.597041181376,591.891467566017,758.108721442964,583.145565687203,699.800823414339,731.194249349385,901.2514014244…
363,"PWY-7385",0,0,95.8854622414946,117.714292679626,125.705519351968,0,0,0,105.824752059385,260.222933702107,255.938657797646,265.671220384874,152.173541429256,167.557398000748,126.519806266368,313.871884599067,105.796099236379,85.7465309610182,165.318127347559,0,140.199344424224,0,0,0,0,0,0,0,0,0,0,0,0,0,0,0,0,0,0,205.580767473632,60.9238890791946,176.644809477929,0,0,0,0,0,0
364,"PWY-7391",0,0,0,109.652347951662,72.7682309197025,0,171.49241527893,292.392923950828,147.8606999234,18.1539647696336,259.709710093242,237.034470747913,37.6383027501459,38.7527752286916,0,187.786328297504,23.8768159670869,0,18.3244261994262,0,0,37.248938471814,63.5725095367333,25.3336233282977,109.866834544919,38.1089722302627,0,23.269880370576,27.9455464263196,86.4775965203596,37.60671329709…
365,"PWY-7392",11403.3612207385,7447.00222554522,7883.06857628799,15538.6970312554,10953.5322178729,9174.55305782906,12989.2257159403,17262.6284789539,9080.06380673507,13662.4555786464,16715.2961893073,16766.4122373596,10042.4095026708,8507.25835726444,7209.31931145122,20381.7830128238,10350.410236867,13568.0928276157,14221.2317603928,10499.9879389728,13837.6595151092,14038.8786410253,8279.801818…
366,"PWY-7398",0,0,0,0,0,0,0,0,0,0,43.2440087767724,0,0,0,44.6050628825596,279.496755177508,314.928480729745,274.381411404601,0,0,0,0,0,0,61.8835035241177,0,0,0,0,0,250.09104124078,150.159873954185,0,0,0,0,0,0,0,0,0,0,0,0,0,0,0,0
367,"PWY-7400",19520.7074904866,12581.7306180579,13407.5403386857,23795.8275831657,16241.6975386965,13398.0338319108,23756.4757689103,31069.7265067072,14977.4943977619,24156.4588867283,30529.0408636939,30586.1646704695,17843.9553539261,14591.5949487901,12920.6673891797,28408.1990328149,14785.2865319073,18430.27258616,26182.5907913598,19665.9382950204,26314.3704403014,22417.2337401552,13886.204483…
368,"PWY-7401",0,0,0,0,0,0,0,0,0,0,0,0,0,0,0,0,0,0,40.3786574408496,0,0,43.9686963913654,0,0,0,0,0,0,0,0,16.6043773830939,0,0,0,0,0,0,11.5,0,0,0,0,0,0,44.9878125212878,0,0,0
369,"PWY-7413",0,0,0,0,0,0,0,0,0,0,0,0,0,0,0,0,0,0,0,0,0,0,0,0,0,0,0,0,0,0,0,0,0,0,0,0,0,0,0,0,0,0,0,209.436407173475,0,0,0,0
370,"PWY-7415",0,0,0,0,0,0,0,0,0,0,0,0,0,0,0,0,0,0,0,0,0,0,0,0,0,0,0,0,0,0,0,0,0,0,0,0,0,0,0,0,0,0,0,105,0,0,0,0
371,"PWY-7431",7127.32688806767,5501.28151007314,4845.94738676927,12305.0642481909,8725.69850915911,7164.45037950602,9273.5124067389,13098.3246495076,7786.92579524316,11355.9097222458,14035.590661496,13838.3510387638,8593.60310375124,7094.10181478601,6293.74114806116,11917.9352586353,5844.8756620758,7358.8076816704,12245.9880522046,9040.40865136586,12450.4710291322,7075.76044919827,4186.320223886…
372,"PWY-7446",761.645772343723,455.173376774494,592.65788330679,426.081151079137,305.360269360269,357.719021310182,638.490956144201,600.661809707043,489.869158878505,596.532595811932,639.05063388398,726.575205786979,446.487873732837,309.189777411377,321.560869565217,1855.11258894047,1162.58780201491,1261.0105420831,607.923238600018,432.569361702128,577.510876612787,915.181486361962,841.043450931…
373,"PWY-7456",0,80.5714611536131,0,1329.14981988416,1176.87289586449,1151.29978963624,980.514161244262,1109.4040650844,617.322319063786,27.7753068272828,993.925021471138,554.844562286603,1012.19066169419,496.996648613301,376.261741209587,1318.1891876948,474.011564872462,445.79086292232,0,212.587918423432,17.7824387680995,526.509088717992,935.866442870499,647.240891671654,485.496816851327,361.302…
374,"PWY-7527",945.862986333022,658.38212502409,1058.64390615337,1671.88064085702,1226.30807557468,1398.93080023367,1139.93328822506,1020.07582663123,379.613896156942,1113.96121546449,800.806490923114,1044.20794685839,0,244.579501933348,0,2530.79507792597,1354.84044519594,1746.83907111508,689.761802867109,761.549920211324,941.435082243857,2862.42785023724,1890.53226832197,2627.18098026796,1747.70…
375,"PWY-7539",17959.4029179986,11594.3388166803,12138.9830455724,21776.4478704593,14843.1516973569,12573.9088389364,21393.2625865373,28175.0606497152,13686.595756238,21260.8146381721,26321.1862187667,26282.1377733217,16756.1586913134,12929.0044819623,11943.4532264434,25839.8429032778,13270.0527443426,16651.749293694,22664.3529256498,17346.4070545665,22717.4875420634,19574.5551318548,12382.551009…
376,"PWY-7560",19089.2032139805,12242.9878451414,12902.446170698,22652.6279727825,15601.363421231,12747.8753208109,22916.8308276373,30572.0094474996,14345.0609677764,23612.7693462127,29739.2024438533,29280.4940671916,17277.4447101867,14265.1148642053,12557.6248016051,26981.8056945644,14091.8043039028,17772.2448252691,25254.6775365229,18994.3167079161,25273.8822265673,21597.9320027679,13474.174787…
377,"PWY-7616",3201.5966336831,1870.30181527129,1963.15610446833,3798.28217605599,2812.48525503906,2173.4713971737,2899.29408785724,3616.98327765726,2157.02584017799,3407.21965536363,4087.04123372893,4340.55680048748,2775.4796780153,2217.75988519261,2162.30789139086,6168.58396642676,3386.04106773123,3876.3288804489,3825.16062529413,3132.55478102399,3863.34140916051,3255.62573353161,2213.150587414…
378,"PWY-7644",0,0,0,1.98547229077855,0,0,32.1776450830379,0,23.7009786909141,0,0,0,359.920725555766,0,170.231303326079,9.61496465720361,0,0,0,0,0,41.3492754421731,0,0,0,0,0,0,0,0,398.802498536251,179.876028055109,80.5,0,0,0,0,0,0,0,0,0,0,0,0,0,0,0
379,"PWY-7663",28191.062996657,19013.51450395,20218.0343409014,36106.0384760276,25252.4392449193,20612.6399275133,35042.3828311972,45615.9824577066,22016.2149348696,35880.3271626862,45291.5105905936,42585.7410672101,28175.6718361997,22617.9619544944,20887.7451568184,32511.9164554367,16594.2307388848,21089.1355906628,35713.4960266987,27152.5217597541,35288.0634116362,28668.0412900229,18155.6715563…
380,"PWY-7664",14729.0446677687,9748.52072617783,10526.7592832455,20581.629360836,13731.4190989845,11678.1163758103,17016.3519309109,23179.2201233836,12062.4638683794,16582.4447476655,22291.6508273923,19834.7868188831,17527.9790779649,13972.4602254632,12102.7518165698,15767.6833980841,6742.82012997218,8478.59764841566,15322.927885155,11868.6672156866,15836.6621251892,11900.1529488621,7687.7070191…
381,"PWY-841",22501.9853570717,14359.818335017,15439.7917677226,26801.1320004313,18236.6171176798,15146.5727832705,26934.4371010959,35184.8340220292,16653.0797404242,27435.1146830104,34687.9721185058,34513.313682304,20426.5793389381,16513.7292613586,14659.1458613538,32333.1791478287,16729.3807956691,21006.7133395686,29212.3394772417,21785.815508974,29364.4459488171,25922.0462174581,16247.28789031…
382,"PWY-922",845.887273683167,694.383598321883,812.375627668383,505.519900320013,483.541417740249,292.990814064949,457.465898371072,423.748969347497,292.227748590502,358.011962538972,436.88989305336,306.131218015654,341.697713185778,132.974696140348,8.09121162482569,351.452303317835,60.9579105551863,48.2389614230554,553.831485700232,544.355334741057,465.711055413571,287.042817019287,155.30938647…
383,"PWY0-1061",10547.4338117837,6756.40397082089,6930.92896349227,11455.5822956738,7388.31896509068,6332.81293317638,10382.3052721661,12563.2350879485,7090.69688505721,9714.62976673391,12957.0411082553,12859.3251407265,9174.31980481767,6812.44985298265,6408.13966314595,19141.9816737991,9663.11697052398,12868.6712374263,10319.3331204162,8284.81686100286,10301.7384032174,12626.1897740257,8518.7674…
384,"PWY0-1241",9952.65268204273,6688.89947804334,6962.49514842893,12327.548975894,8519.41178183596,6361.00523693512,12361.7106258425,17074.7487797152,7582.01391727447,14449.0714068186,17452.6965554926,16697.9419061433,9950.45611025492,8766.03987350724,7737.10983300848,10915.7559691754,6042.70365731356,7299.90187549725,14725.8998195417,10789.847041393,14049.3553003151,10850.1627232796,6923.902035…
385,"PWY0-1261",17431.3610989409,11522.8031504493,13279.7358943125,22240.3459027032,15109.8152125187,12674.7900851743,19601.1847280246,25510.9167785771,12258.2051643348,21603.7106785073,26953.6205959379,25839.5636469232,15904.7105753738,13306.9079637446,11788.3721075177,24530.5726951104,12828.0692642616,16279.5855055824,21656.578147139,16417.5195414613,21694.5053216523,20420.6975260464,13271.3897…
386,"PWY0-1277",1276.32027058897,704.755354570823,554.259257002662,2918.24912970601,2053.78408334693,1834.1297911371,2021.00735475301,2255.01788217688,1147.59439505945,1500.23535679315,2249.17115023081,2414.96310619628,1533.13490401483,1580.82313042571,1571.40757329693,1969.86016338379,982.78328899091,1594.35506417391,1706.93936389166,1517.63286477841,1815.87385951504,1255.73180011613,627.5461607…
387,"PWY0-1296",7264.47027070103,4678.31634400587,5187.52885373546,9436.20670913027,6688.24245527742,5895.90319753994,9395.30663840775,12295.986748259,4705.83192905584,8962.49207874711,11300.1751008177,10335.3472302076,5071.95560891258,4506.75183277454,3601.47328486545,13980.1215723445,7176.96463485159,8905.05959955347,10236.9154636169,7089.6749117119,9883.48747444963,12157.317645754,7836.1547927…
388,"PWY0-1297",6922.67052267726,4418.49583991901,4890.14576295567,9278.62059769048,6484.03219911412,5849.48040369998,8953.90823526859,11707.3376859536,4395.74452113915,8545.51850558795,10686.5524645008,9681.31988182681,4801.33919149455,4274.40447766646,3710.40462950715,13200.5355850361,7124.54696366846,9038.12846956108,9918.13582749566,6841.94845002504,9565.57030921318,11439.4038894443,7379.3365…
389,"PWY0-1298",5753.53901483921,3681.17021470593,4102.93469944969,7732.16833855168,5474.30891455875,4954.54512459497,7360.43568977448,9661.37467538875,3579.82512799546,7217.47202414943,8951.05145330813,7984.10415050498,4003.35578176881,3545.76102910957,3038.40754822958,10298.2927407677,5628.60734165798,7272.01725694113,8255.96578520398,5625.6938361152,7888.87504363193,9915.2038818837,6334.735720…
390,"PWY0-1319",24994.8254070191,16052.0271761133,17262.4281251993,30967.4857950823,20799.4531896869,17199.7130164629,30644.5847215514,40457.3031425826,18853.5840812492,30965.6183333907,39358.3876447879,38994.3301261356,23709.9642294909,18998.0746967191,16946.3266136925,36364.0463125091,18853.7222429635,23515.2154278693,32802.5659754198,24447.0514853469,32813.0047639829,29388.1472193537,18617.641…
391,"PWY0-1338",35.9668631681387,0,0,377.499871576642,88.8565730043511,102.260329662207,5.51526263155388,103.398595023323,199.371113537641,157.111441356254,255.095199706852,64.031993227809,260.055155597817,174.088492098671,138.493820691754,778.106962994454,392.983799254805,525.224880649926,178.846054897291,162.123018384843,129.31165692093,136.0777056847,174.907104460995,49.7199118253974,167.68374…
392,"PWY0-1415",9742.81804849177,6415.86240341731,7021.45221561219,12359.8592948865,8244.41322039243,6985.25848221539,11713.9889548243,14688.5845550221,7260.15052181459,11764.8245760529,15405.5635634822,14779.075124981,8786.39366988035,7268.86218918532,6129.15555799323,14807.7813151911,7467.66566729551,9555.50277977781,12010.9904968206,8835.68155801919,12080.1016847204,11239.4842449542,7352.72651…
393,"PWY0-1479",7446.72756323186,4244.05805677852,4873.04915893474,9170.13223904635,4834.59037827621,3131.585526924,8623.52307485358,11188.4589026421,3689.94199181553,10527.1001824929,13113.0158520387,12121.7753538171,7036.57140385044,5088.87150931742,4721.27656652122,12531.9113301961,5856.09032580564,8104.38773526837,10448.8806732192,7833.18143269533,10186.5749800912,9593.84926695246,6175.162867…
394,"PWY0-1533",5539.75693270849,4475.9951425837,4618.7290041135,7135.48465566053,5665.71323245976,4430.88728627234,6624.31574102855,7909.69874178502,4335.06325819507,7281.99688167963,9110.37442069927,8515.97406658686,5490.10212614817,4495.4228008184,4468.90613969379,4466.5817698535,2274.67798109488,2275.20231730657,7674.57950345778,5744.29213097177,7964.27554280347,2722.80785593406,1305.58339454…
395,"PWY0-1586",14501.0714895573,9514.391089368,10953.130949402,18611.7842731652,12180.1735634994,11219.3099115223,16400.4843083376,20581.1313630431,9630.14659553476,16189.0603677946,20717.1082628546,21952.6212335711,11501.0201302794,8998.78932509369,7729.12251719175,27945.4223373596,15131.4987790458,18184.966016629,18118.5289276012,13508.9028508386,18113.5908617104,20905.611088126,13246.19067267…
396,"PWY0-162",23411.0296719865,14980.2486459777,16116.463820279,27961.6462589939,18929.1754423065,15690.7229168665,28196.1275069706,36804.9224347961,17275.5157078597,28701.5764684818,36345.1321840557,35919.6012869221,21088.314623773,17137.8141146942,15249.0115212659,33310.1369569556,17338.436969853,21608.6578520398,30605.0678527263,22731.7834812669,30753.3373663141,26996.1932378545,16947.3713198…
397,"PWY0-166",17429.3394001624,11031.1950374779,11861.3252882946,20594.8016006894,13892.4033930602,11694.9429620635,20454.4697086964,26657.0232926333,12904.2119672848,20886.1882710011,26173.0896860886,25873.9578988736,16051.4151803678,12785.9590371254,11626.2889468836,24233.2784457147,12587.7210716385,15867.1672213401,21958.8688973655,16563.9113598775,21848.4267700349,19225.2626181162,12100.8749…
398,"PWY0-321",3228.156796206,2234.879607968,2382.64132643321,4162.57719099029,2581.51987980015,2276.60323292383,3574.67127789243,5242.57983769553,2667.5894468305,4644.50103398627,5307.1485948109,4977.91011666247,3115.90199890167,2461.66219712172,2301.26189828242,4268.76184932169,2016.68751021693,2814.58355621783,4471.47087350303,3345.80119871296,4503.74522173755,2328.50198942697,1411.81638839842…
399,"PWY0-41",0,114.639244510146,0,1387.26474217252,1180.87565060198,1186.53119323496,811.993175041034,1039.25353190092,0,0,14.9329164659444,0,0,0.389908944231867,0,2434.75805647971,1657.16619185833,1927.38484177902,56.9848363484273,43.9029254090071,0,2094.70832531303,1228.39003845495,2048.77656883778,1049.06037481029,920.638041467108,652.052038495506,1572.18737617147,1483.02405925626,1516.081579…
400,"PWY0-42",4101.21144887138,2639.46227324379,2751.71536666439,3451.98487302001,2112.61669001085,1863.61391307208,3168.10323738173,3992.63855686722,2092.31664779251,3543.42984333979,4481.78479820818,4288.24268034389,3132.50860554291,2352.67915022309,2131.80689239528,4236.32716346595,2124.36294282373,2574.30846416211,3672.60003489319,2563.19715868703,3881.80255862881,3146.25106450579,1992.227855…
401,"PWY0-781",16991.2735284766,11159.1160013607,12037.0235773347,20710.8592426437,14047.4905063323,11650.0146073568,19758.2649285454,25741.9095867166,12294.6238120069,20064.9674501244,25906.7292440022,25602.0651081972,15102.740403116,12345.81678717,10796.7968953945,24803.841813698,12936.9912551004,16063.6204537598,21459.2953269153,16085.7490680363,21373.0866360213,18974.6417702038,12063.55745943…
402,"PWY0-845",395.393417622123,392.481642696989,82.9051397034265,4374.41707321313,2040.84907812326,1972.79339739305,3111.04402148578,4484.64044504033,3036.33222695246,2962.02732884083,4492.25383722911,1897.19607637952,4230.21313453346,3003.03864563393,3095.22747982749,6609.91061174825,3581.48720125608,4317.51214124237,2675.77486086994,2407.95003045523,3131.33874222745,3500.788108206,2504.9935337…
403,"PWY0-862",13297.6992293335,8795.82838066956,9514.46095188458,18709.6181399754,12456.9055410429,10620.0316997544,15344.2940881331,20928.3429879186,10953.7687045015,14898.5810583665,20099.4953802529,17807.2444844513,16082.2440899599,12812.9452684612,11073.0079590575,14100.4426697657,5985.73044961231,7528.45962884662,13693.5841227552,10620.7338943284,14161.904961327,10623.2347708839,6881.611926…
404,"PWY1G-0",3721.27909280369,2180.0752090893,2506.46485699291,4447.97238307164,2891.59601938709,2492.53670679963,4536.95342858576,5742.20103448944,3059.89878488251,4164.92998322001,5472.90342966926,6704.73739240804,2701.19910920552,2046.89343311824,1768.66494173942,9273.46616908305,5105.18936662574,6075.33523300728,4946.25480247473,4301.89047065323,5212.5371953165,4033.02336759162,2540.15977356…
405,"PWY490-3",2585.47744783283,2167.13777005618,2317.63064425132,4256.10053051451,3076.16430631281,2568.2588158174,3051.84733630674,4212.83364120969,2211.59501313993,3491.83962663754,4361.44773329476,4041.43570868954,2474.55203348016,1795.15927551626,1836.17290495077,1802.34968803624,1086.78289591406,1502.57397837938,3668.96471224845,3001.30676536158,3894.66992850595,1335.49551198286,1004.969755…
406,"PWY4FS-7",24312.2639990447,15492.3103376691,16697.6197047959,29317.1657583279,19997.6385050107,16558.6333663675,29523.2057722795,38619.1081418721,18161.662385715,29970.0237616126,37990.583023732,37964.8984238613,22224.8459370408,17976.9372919969,16045.0863162108,34989.4717213913,18122.8664883762,22823.2065824455,32007.9744836857,23820.4089389466,31943.9198201171,28223.8928321469,17724.857936…
407,"PWY4FS-8",24312.2639990447,15492.3103376691,16697.6197047959,29317.1657583279,19997.6385050107,16558.6333663675,29523.2057722795,38619.1081418721,18161.662385715,29970.0237616126,37990.5830237319,37964.8984238613,22224.8459370408,17976.937291997,16045.0863162108,34989.4717213913,18122.8664883762,22823.2065824455,32007.9744836857,23820.4089389466,31943.9198201171,28223.8928321469,17724.857936…
408,"PWY5F9-12",0,0,0,0,0,0,0,0,0,62.5309661436829,72.1558666474239,0,0,0,0,13.9419087136929,0,0,0,0,0,0,0,0,0,0,0,80.2453406338844,0,45.9139197984464,0,0,0,0,0,0,0,0,0,2.65168539325843,0,0,0,0,0,0,0,0
409,"PWYG-321",15433.5236260266,10206.7753155174,11033.9018689363,21606.9816933537,14408.4535648412,12258.3661551403,17828.6615006971,24287.3515944437,12666.5905414465,17359.4744563888,23360.858064356,20792.5459770268,18396.4622436248,14679.2769719151,12706.4130825733,16550.5041130028,7064.71296864101,8880.22357420604,16041.5594774631,12435.8571313585,16582.1017588534,12460.819762625,8056.1134018…
410,"PYRIDNUCSAL-PWY",13145.5283620199,8669.40954149783,9493.82174950645,15007.0480651622,10562.8391070459,8352.83633461854,14404.2722759114,18105.5542110489,9192.94115224867,15432.0397547938,20397.2777735145,20444.4677139012,12174.1856571945,9806.26220196903,8757.33208302126,19233.0238265971,10051.1566979568,12393.1598004145,16623.854445217,12797.0179854195,16999.1951168227,13346.9494967866,8505…
411,"PYRIDNUCSYN-PWY",17925.3506804035,11277.4018329929,12187.5391984077,21357.6894667157,14514.8918211565,11869.1184985915,22078.2669784763,28872.7980591857,13318.1488893369,22264.0308494718,28321.0404136264,28161.9260133121,16575.5021424056,13468.4042002118,11681.9582990531,25549.6494527484,13291.8872801168,16736.7918976539,24101.9514992291,17884.3645764557,24077.834324906,20981.2435326788,1307…
412,"PYRIDOXSYN-PWY",175.650127119507,176.657941944473,35.8676442782347,2921.63222666044,1140.47069985041,1138.94604057093,1929.39713939245,2899.43826504376,2215.56028153947,1700.7030583312,2860.36107462398,944.190360679394,3814.6068077809,2419.67833041031,2482.82520231107,4729.5751267473,2499.0563597647,3072.05496961344,1510.49888141123,1402.46784336777,1842.39185637874,2289.68608578552,1787.372…
413,"REDCITCYC",22478.6996819873,14831.3586888839,16523.2898329247,27758.4465932399,19168.4738842291,15554.0004997979,26210.8337582671,33279.8430265318,17033.9827835287,27032.0292916943,35203.8184790194,34743.9774608267,21311.9961489451,17160.5203194591,15379.6548064887,35563.7091471259,18986.3920564129,23944.1452161456,28131.298133875,21751.4206087172,28165.8308659176,26695.6171548176,16956.4045…
414,"RHAMCAT-PWY",2744.5107840862,1551.31384596194,1880.52935586165,4039.05685338285,2828.7055278891,2367.17929443875,3255.69031810408,4279.48381640718,2368.00399422198,3669.08330959063,4707.84879845718,4412.9485409431,2587.0927344376,2085.74496946869,1747.64648526198,8126.16180561203,4465.28882951188,5065.06265288399,3616.95758738,2733.95881003493,3537.20448428201,3563.1648319835,2690.2766580326…
415,"RIBOSYN2-PWY",19992.1466384302,12772.1614675278,13751.9536410531,24141.0015049849,16463.7348920627,13610.9448562986,24165.9406302215,31612.2620309107,14898.3476487278,24537.2738978529,31183.5218370878,30906.7948939398,18355.7046136733,14801.8787636545,13172.9442113826,28637.0486245712,15009.7149465092,18660.2739192548,26162.7985183675,19482.867080623,26233.4874367157,23167.8510946493,14571.9…
416,"RUMP-PWY",2532.17468625866,2138.4730003483,2235.03765458986,4066.8956898086,3322.1278426485,2871.71194586493,2939.15382568965,2651.89446178148,702.549432771268,1741.94124902296,1621.73891933266,1793.73853513944,1878.38395674137,1543.25078155609,1293.19703359136,3090.60656363699,1630.24926943853,2926.68429788051,1440.57336586874,1862.3734535398,1948.30561521734,3869.74321809132,2484.673692182…
417,"SALVADEHYPOX-PWY",15034.7536133664,9903.4309804636,11248.0629913733,21756.0208376476,14880.7055914286,12443.0547594437,19000.4584043143,24781.4686003138,11829.8834113094,19480.1514333472,25935.521169202,24892.4868906364,16321.7353770801,13571.5238353582,11985.0875930635,28376.2355431749,14821.6492695362,18556.3762906506,20837.8000518394,15677.4350409973,20769.6630837039,22595.4084258544,1412…
418,"SER-GLYSYN-PWY",24219.2077273914,15820.7630738742,17282.8197222415,29881.784543097,20474.1788630774,16859.9817559646,28787.662523484,36317.0092025882,17799.8066318539,29532.1431535418,37964.6960483385,37868.3887133554,22585.9855720285,18341.6994403252,16227.3215563725,35325.2769142704,18321.2058231635,22849.6276293012,31324.8948029523,23275.2113900812,31381.2152294317,26592.6906099351,17147.…
419,"SO4ASSIM-PWY",19137.1295240271,12580.884376576,13318.7493428681,22111.0829937655,15697.3979898513,13027.4016147056,21091.6641329586,28318.4144121961,13904.7410212899,22888.7451200379,28185.2131065296,26820.3313395309,19295.9998794212,15719.4954532012,14193.9952075324,21807.2749862602,11731.088932592,14164.4176578068,23385.7893139473,17721.6419746429,23643.2270679359,18065.0268796581,11496.37…
420,"SUCSYN-PWY",441.748331329245,223.649936833659,168.682890191003,953.665497386914,747.638494808554,609.011837669783,318.289408571185,264.134496926103,203.189931071778,979.942152119765,1020.9771155635,580.636771956964,200.948336058698,44.7213589493918,177.360982015982,627.988597516982,145.294038661513,265.18513107357,261.29098675712,170.724313731304,391.92180496595,1181.16398292106,740.54651547…
421,"SULFATE-CYS-PWY",20741.0001553896,13734.6806564245,14309.2939263099,24881.8306125876,17484.3331140692,14325.5374417238,23705.2714888505,31751.9222957168,15275.6833991591,25412.2072411403,31807.578575585,30652.287764795,20208.7307551983,16490.2642664564,14568.7310952544,25831.847556178,13598.2536283624,16750.4636028486,26438.1598259452,19982.9977949635,26855.5862766848,20677.5178390119,13161.…
422,"TCA",26118.9746984776,16726.7213271788,18012.5917108116,31904.6123354019,21859.8396021533,17901.2351137081,31738.1823085631,41621.9730777761,19471.0992572845,32261.1101148886,40837.9678276804,40676.3812712407,24137.397155245,19578.6939147719,17260.744690761,38332.3302252665,19955.5653809443,25083.9443837294,34315.007928439,25728.7959796744,34422.5032040418,30005.5088577526,18669.7939194192,2…
423,"TCA-GLYOX-BYPASS",13632.0274118393,8744.55302357136,9488.63285395697,15467.7408336378,10163.7172138707,8990.20558468344,14072.6588222773,16957.0494671623,9035.60217070341,15250.2112733448,19380.590307427,19409.2303794226,12606.1982790625,9754.68793061333,8650.68114129304,18867.2233114936,8869.16897131817,12301.5562220373,16096.2545721155,12246.2626173464,15782.2941813308,14064.352829858,9054…
424,"TEICHOICACID-PWY",1912.32802256026,1192.79255143261,1259.60377960341,3727.25965109055,3095.54570124098,2731.686401493,1314.22008513109,2838.86535037641,1647.09354253842,1510.57826189159,2066.78476405807,2330.52159424585,1017.84362443823,527.514815336107,706.741005089012,6059.76984173596,3276.55723357627,3959.17789487702,1630.38416328344,1338.71678783285,1846.73023213413,3509.85406042989,1658…
425,"THISYN-PWY",15865.624973566,10149.1345763591,10460.7586200811,18135.2010993815,12555.9020237998,10526.172458192,17322.7005620683,24073.1889734849,11123.9284234011,19364.2048996525,23730.252396778,22485.8793999653,15450.4021487475,12762.515916485,11377.824907065,17916.420101322,9800.74107512229,12657.049755908,20048.6708368556,15194.2916036259,19670.6357341375,15856.8283202994,10259.941067850…
426,"THREOCAT-PWY",0,0,0,0,0,0,0,0,0,380.381418389098,516.671089592248,0,0,0,0,405.922081502548,49.9813477858204,113.319950744435,0,38.6772073843067,0,0,0,0,0,0,0,0,0,0,0,0,0,0,0,0,0,0,0,0,0,0,0,0,0,0,0,0
427,"THRESYN-PWY",22035.0083004083,14451.6483312547,15495.0687551372,26438.4555780176,18228.6556273889,15062.0130091045,25725.1160994512,33421.6634799914,15626.2120126601,27395.429248872,35011.0964102509,33494.6896635995,21050.9249825588,17327.6591154952,15228.1863937266,31480.3081458024,16523.5187094995,20695.2391911553,28009.3781690001,20904.4574491254,27908.9438035319,25414.292876113,16531.514…
428,"TRNA-CHARGING-PWY",18807.5978438775,11990.3567164279,12691.7813242447,23001.5885208216,15704.6455694525,13138.0812871227,22825.6403655529,29919.4886680675,14079.2197754905,23022.8393361654,29067.3436476889,28378.9721604337,17332.8360555344,14128.6630907227,12507.7622768399,25753.6804649352,13379.6937961358,17050.0659358983,24277.4564842952,18120.9943185082,23927.3060453637,21881.3829528083,1…
429,"TRPSYN-PWY",21925.1120971749,14035.3770842494,15129.7019661324,25770.3177298036,17535.6603582298,14651.3346442527,26138.2073913577,34101.6155939048,16050.0275005396,26729.8525109892,33672.4111373344,33428.1431953659,19799.2280392463,16101.9305577315,14233.5656370412,31228.5622203796,16432.6909930254,20478.273078062,28434.8035228535,21177.2985165955,28503.9559748861,25422.3630566542,15940.217…
430,"TYRFUMCAT-PWY",4172.63020467704,2892.75745183122,3009.65874415842,5268.11815734548,2947.42182733053,2324.41382328683,4826.00616052636,6747.04757428122,3573.24524374965,4664.88760656659,6502.30230213352,6071.06893183585,5105.39303513808,3417.61716879415,3317.94663695164,6765.33202617013,2640.0409207816,4066.3099196542,5302.89805066487,3957.73808236391,5494.0361649638,4871.58974979096,3026.415…
431,"UBISYN-PWY",11811.6109683146,7526.16469605838,7894.77019956891,12940.5005901382,8333.21057981319,6945.49313350781,11760.9890489624,16075.9996688749,7758.59303809659,13376.0211822752,16878.1551780259,15997.4033570306,10792.199879321,8046.73597076313,7186.68702861213,13004.6767346533,6053.56306414608,8267.14084591091,13414.1156920916,9774.22113440488,13598.9466232913,10816.6659853254,6768.9528…
432,"UDPNAGSYN-PWY",19144.9554404141,12322.5811250234,13344.8954144187,23165.1802757082,15514.586396331,12787.93286746,23096.4016857609,29995.381505673,14054.0321072573,23181.6948813425,29791.9293136861,29957.9308369772,16751.8569371668,13719.2043338062,12056.6918054071,28622.8136338409,14814.0465453634,18035.5052284234,25228.5355592219,18749.3872897449,25719.0073951626,22362.0698172979,13904.405…
433,"VALDEG-PWY",372.137385209778,287.574444215238,308.243838938951,356.800954321599,601.07655019914,225.744013395701,232.578959492675,375.07184740049,0,564.368961835583,880.011865695806,668.444515469948,346.786182923857,252.099825318146,29.9562830853363,0,116.452733421666,0,591.239710212793,417.301662457031,541.819363970451,0,35.9383379501276,0,0,0,23.9099260665026,0,0,0,487.406842818941,335.663…
434,"VALSYN-PWY",35153.373293229,22747.0382359462,24176.4019134913,43992.4184158689,30564.9323951485,24779.2668382451,43530.5629523417,57230.527676465,26924.5053492164,45433.7616996191,57097.6072965328,55351.1582903901,32955.3057988305,27529.3009742994,24279.1483194099,50081.1777913923,25802.0635921208,31110.8600030463,48457.8049297431,36034.77333267,48556.8416555039,38380.7259843057,23833.703407…
